# Supplementary material for: Structural brain abnormalities in the common epilepsies assessed in a worldwide ENIGMA study
Source: PubMed Central journal article supplement (PMC5837616; doi:10.1093/brain/awx341), 2018-01-30
Supplement: brain-2017-01077-file006_awx341.pdf [file brain-2017-01077-file006_awx341.pdf]

## Supplementary Information

### **Structural brain abnormalities in the common epilepsies assessed in 3,876 individuals worldwide**

**Supplementary Note 1.** Additional details of recruitment, standardized image inspection and quality control.

**Supplementary Note 2.** Description of the coordinated ENIGMA meta-analysis framework.

**Supplementary Note 3.** Supplementary analysis of ‘all-non-lesional’ epilepsies versus controls

**Supplementary Note 4.** Analysis of data acquired at 3T field strength only.

**Supplementary Note 5.** ENIGMA results viewer: Instructions for use

**Supplementary Note 6.** Additional supplementary materials.

**Supplementary Table 1.** Locations, dates and periods of participant recruitment, including research ethics committee (REC) details, listed by site.

**Supplementary Table 2.** Breakdown of syndromic diagnoses in the ‘all-epilepsies’ aggregate phenotype group.

**Supplementary Table 3.** Image acquisition and processing details by site.

**Supplementary Table 4.** Full list of cortical regions of interest, as extracted using FreeSurfer v5.3.0.

**Supplementary Table 5.** Results of t-tests for age differences and chi-squared tests for sex differences at each research centre.

**Supplementary Table 6.** Effect sizes for volume differences (Cohen’s *d*) between healthy controls and a subgroup of the ‘all-epilepsies’ phenotype, without evidence of hippocampal sclerosis or other lesions on MRI, controlling for age, sex, and intracranial volume.

**Supplementary Table 7.** Effect sizes for cortical thickness differences (Cohen’s *d*) between healthy controls and a subgroup of the ‘all-epilepsies’ phenotype, without evidence of hippocampal sclerosis or other lesions on MRI, controlling for age, sex, and intracranial volume.

**Supplementary Table 8.** Beta coefficients, standard errors and p-values for the meta-regression of duration of illness in epilepsy against subcortical volume and cortical thickness, controlling for sex and intracranial volume.

**Supplementary Table 9.** Beta coefficients, standard errors and p-values for the meta-regression of age at onset of epilepsy against subcortical volume and cortical thickness, controlling for sex and intracranial volume.

**Supplementary Table 10.** Effect sizes for volume differences (Cohen’s *d*) between healthy controls and the ‘all-epilepsies’ phenotype; 3T field strength only.

**Supplementary Table 11.** Effect sizes for volume differences (Cohen's *d*) between healthy controls and the 'MTLE-L' phenotype; 3T field strength only.

**Supplementary Table 12.** Effect sizes for volume differences (Cohen's *d*) between healthy controls and the 'MTLE-R' phenotype; 3T field strength only.

**Supplementary Table 13.** Effect sizes for volume differences (Cohen's *d*) between healthy controls and the 'IGE' phenotype; 3T field strength only.

**Supplementary Table 14.** Effect sizes for volume differences (Cohen's *d*) between healthy controls and the 'all-other-epilepsies' phenotype; 3T field strength only.

**Supplementary Table 15.** Effect sizes for cortical thickness differences (Cohen's *d*) between healthy controls and the 'all-epilepsies' phenotype; 3T field strength only.

**Supplementary Table 16.** Effect sizes for cortical thickness differences (Cohen's *d*) between healthy controls and the 'MTLE-L' phenotype; 3T field strength only.

**Supplementary Table 17.** Effect sizes for cortical thickness differences (Cohen's *d*) between healthy controls and the 'MTLE-R' phenotype; 3T field strength only.

**Supplementary Table 18.** Effect sizes for cortical thickness differences (Cohen's *d*) between healthy controls and the 'IGE' phenotype; 3T field strength only.

**Supplementary Table 19.** Effect sizes for cortical thickness differences (Cohen's *d*) between healthy controls and the 'all-other-epilepsies' phenotype; 3T field strength only.

**Supplementary Table 20.** Average ages at onset of epilepsy per research centre.

**Supplementary Table 21.** Full meta-analytical results of the age-by-diagnosis interaction test, controlling for sex and ICV | 'All epilepsies' phenotype

**Supplementary Table 22.** Full meta-analytical results of the age-by-diagnosis interaction test, controlling for sex and ICV | 'MTLE-L' phenotype

**Supplementary Table 23.** Full meta-analytical results of the age-by-diagnosis interaction test, controlling for sex and ICV | 'MTLE-R' phenotype

**Supplementary Table 24.** Full meta-analytical results of the age-by-diagnosis interaction test, controlling for sex and ICV | 'IGE' phenotype

**Supplementary Table 25.** Full meta-analytical results of the age-by-diagnosis interaction test, controlling for sex and ICV | 'All other epilepsies' phenotype

**Supplementary Table 26.** Full list of case-versus-control effect sizes for volume differences, including non-significant findings | 'All epilepsies' phenotype

**Supplementary Table 27.** Full list of case-versus-control effect sizes for volume differences, including non-significant findings | 'MTLE-L' phenotype

**Supplementary Table 28.** Full list of case-versus-control effect sizes for volume differences, including non-significant findings | 'MTLE-R' phenotype

**Supplementary Table 29.** Full list of case-versus-control effect sizes for volume differences, including non-significant findings | 'IGE' phenotype

**Supplementary Table 30.** Full list of case-versus-control effect sizes for volume differences, including non-significant findings | 'All other epilepsies' phenotype

**Supplementary Table 31.** Full list of case-versus-control effect sizes for cortical thickness differences, including non-significant findings | 'All epilepsies' phenotype

**Supplementary Table 32.** Full list of case-versus-control effect sizes for cortical thickness differences, including non-significant findings | 'MTLE-L' phenotype

**Supplementary Table 33.** Full list of case-versus-control effect sizes for cortical thickness differences, including non-significant findings | 'MTLE-R' phenotype

**Supplementary Table 34.** Full list of case-versus-control effect sizes for cortical thickness differences, including non-significant findings | 'IGE' phenotype

**Supplementary Table 35.** Full list of case-versus-control effect sizes for cortical thickness differences, including non-significant findings | 'All other epilepsies' phenotype

**Supplementary Figure 1.** ENIGMA-Epilepsy worldwide map.

**Supplementary Figure 2.** Illustration of the coordinated ENIGMA meta-analysis framework.

**Supplementary Figures 3-12.** Forest plots (included in a separate document; see Supplementary Note 6)

## Supplementary Note 1: Additional details of recruitment, standardized image inspection, and quality control

Data were collected at 21 unique research institutions worldwide. Scans were acquired at two separate research centres in Dublin, Ireland (see: EPIGEN\_1.5T and EPIGEN\_3.0T), Tübingen, Germany (see: EKUT\_A and EKUT\_B), and King's College London (see: KCL\_CNS and KCL\_CRF). We set an arbitrary minimum sample size of  $n=5$  for all epilepsy groups. Research centers containing epilepsy groups with less than 5 participants were omitted from that analysis. For example, the Brussels center, which consisted of  $N=4$  individuals with MTLE-R, was omitted from all MTLE-R regressions. Similarly, the IDIBAPS group, which contained  $N=3$  IGE cases, was not included in any IGE regressions. In Table 1, sites with less than 5 participants are marked as '0' for that phenotype, with the original sample size noted in brackets '()'. Age at onset and duration of illness information were not available for the **Bern** and **EPICZ** sites.

We did not harmonize image acquisition parameters across research centres, as the vast majority of T1-weighted MRI scans were collected before this study commenced (see Table 1). However, all other aspects of the study, from image processing, to quality inspection, to statistical analysis, were conducted in a coordinated manner across centres, using standardized, well-published protocols, freely available at <http://enigma.usc.edu>. Analysts at each research centre were blinded to the participant's diagnosis. All analysts conducted image processing using the latest version (v5.3.0) of FreeSurfer – an automated suite of brain MRI reconstruction tools (Fischl et al., 2012). Analysts examined each image individually for improper segmentation. An online ENIGMA support group provided neuroanatomical expertise in cases of uncertain segmentation. Quality assurance guidelines and videos were also made available on the ENIGMA website. Further, each analyst was instructed to execute an automated ENIGMA script, which provided a list of cortical thickness values that deviated from their centre's mean at  $> 3$  deviations. Any segmentation identified as an outlier via this script was re-assessed via visual inspection. Structures that the analyst judged as poorly segmented were omitted from the analysis (the full brain scan was not typically omitted, unless segmentation errors were markedly widespread). Structures identified as statistical outliers, which the analyst judged as correctly segmented, were kept in the analysis. Histogram plots were generated for each cortical thickness measure: these showed an approximately normal distribution of brain measures, at each research centre. Histogram plots for each research centre are available to download and view at <http://enigma.ini.usc.edu/ongoing/enigma-epilepsy/enigma-epilepsy-gm/>.

## Supplementary Note 2: Description of the coordinated ENIGMA meta-analysis framework

All statistical analyses were conducted separately at each research centre, using ENIGMA's standardized statistical analysis scripts (see Supplementary Figure 2). These open-source scripts connect the user to an online Google Spreadsheet listing a series of R commands for linear regression and partial correlation. The main study PI can manipulate this list of commands to include new tests, without the need to re-configure scripts to each user. The user simply specifies their research centre ID (e.g. "EPIGEN"), and the paths to their local data and script directories (e.g. `"/users/christopherwhelan/ENIGMA-Epilepsy_data/"` and `"/users/christopherwhelan/ENIGMA-Epilepsy_scripts/"`), executes the script in a bash terminal, and receives a collection of output files containing Cohen's  $d$

effect size estimates (for case-control linear regressions), *beta* coefficients (for partial correlations), standard errors, p-values, and several other statistical measures. No MRI data or participant information are exchanged between centres, and all output statistics are completely anonymised.

All statistical output files are then uploaded to a central ENIGMA server, and pooled using an inverse variance-weighted random-effects meta-analysis, via the R package, *metafor* (version 1.9-8)<sup>1</sup>. We chose to meta-analyse data using a random-effects model to adjust for the large number of case-control cohorts included in the study (N=24, from 21 research centres), with heterogeneous ethnicities, diagnoses, seizure types, and age ranges. We employed the restricted maximum likelihood method (REML)<sup>2</sup> in all random-effects meta-analyses.

1. Viechtbauer W (2010) Conducting Meta-Analyses in R with the metafor Package. J Stat Softw 36(3):1-48.
2. Harville DA (1977) Maximum Likelihood Approaches to Variance Component Estimation and to Related Problems. J Am Stat Assoc 72(358):320-338.

### **Supplementary Note 3: Supplementary analysis of non-lesional epilepsies versus controls**

To test for a possible confounding effect of known hippocampal sclerosis in the aggregated all-epilepsies phenotype group, we conducted a supplementary case-control regression using a smaller sub-sample of the all-epilepsies aggregate ('all non-lesional epilepsies'). This 'all-non-lesional epilepsies' subgroup overlapped with the aggregated group of syndromic diagnoses listed in Supplementary Table 2; however, patients were excluded from the non-lesional group if they presented with any evidence of abnormalities on clinical MRI, including focal cortical dysplasia, tumours, hippocampal sclerosis or other lesions. The aggregated total number of cases in this group was N=939, and the total number of controls was 1,379.

Each research centre tested for case-versus-control differences using the same coordinated statistical analysis protocols detailed in the Methods. Sex, age and ICV were again included as covariates. *P*-values were compared to an adjusted significance threshold of  $P_{\text{thresh}} < 1.49 \times 10^{-4}$ , as in the main analysis.

Compared to healthy controls, the all-non-lesional epilepsies group revealed patterns of subcortical volume reduction in the right thalamus and right pallidum, in addition to enlargements of the right lateral ventricle (with nominally enlarged left lateral ventricle), largely supporting findings from the aggregate all-epilepsies analysis (see Results). Contrasting with the all-epilepsies analysis, the all-non-lesional epilepsies group did not exhibit volume differences in the hippocampus. The all-non-lesional epilepsies group also showed enlargements of the left amygdala, a finding that was not observed in the full all-epilepsies analysis (see Supplementary Table 6 for a full list of *p*-values and effect sizes).

The all-epilepsies group and its smaller, all-non-lesional epilepsies subgroup showed similar patterns of cortical thinning compared to controls, with both epilepsy groups showing lower thickness estimates in the precentral gyrus (bilaterally), paracentral gyrus (bilaterally), caudal middle frontal gyrus (bilaterally), superior frontal gyrus (bilaterally), right cuneus, precuneus (bilaterally in all-epilepsies; right hemisphere only in non-lesional epilepsies), *pars triangularis* (bilaterally in all-epilepsies; right hemisphere only in non-lesional epilepsies), supramarginal gyrus (bilaterally in all-epilepsies; right hemisphere only in non-lesional epilepsies) and transverse temporal gyrus (bilaterally in all-epilepsies; right hemisphere only in non-lesional epilepsies) compared to controls. In the non-lesional subgroup, additional cortical thinning was detected in the right lingual gyrus, the superior parietal cortex bilaterally, and the right lateral occipital cortex. Contrasting with the main all-epilepsies group, the ‘all-non-lesional epilepsies’ subgroup did not show significant thickness differences in the left entorhinal gyrus (see Supplementary Table 7 for a full list of *p*-values and effect sizes).

#### **Supplementary Note 4: Analysis of data acquired at 3T field strength only**

In our main case-control meta-analysis, we tested for volume and thickness differences across 24 research centres, using data extracted at both 1.5T (2 centers; a combined total of 78 people with epilepsy and 68 healthy controls) and 3T field strengths (22 centers; a combined total of 2,071 people with epilepsy and 1,659 healthy controls; see Supplementary Table 3 for a full list of field strengths at each centre).

To test for a possible confounding effect of combined magnetic field strengths, we conducted a second meta-analysis, using data extracted at 3T only. Statistical methods were identical to those detailed in the Methods.

Meta-analytical results obtained using the full sample (1.5T and 3T) and the 3T sample were highly comparable, with similar patterns of cortical thinning reported across all four subgroups and the aggregate ‘all-epilepsies’ group (see Tables 2-3 and Supplementary Tables 10-19). Differences between the ‘3T-only’ analysis and the full analysis included the following:

- (i) In the full analysis of ‘all-epilepsies’ versus controls, volume differences were reported in the left putamen. These differences were nominally significant in the 3T sample, after Bonferroni correction for multiple comparisons,
- (ii) In the full analysis of MTLE versus controls, volume differences were reported in the right thalamus. These differences did not survive Bonferroni correction in the 3T-only analysis,
- (iii) In the 3T analysis of individuals with IGE versus controls, volume differences were reported in the right pallidum. These differences did not survive Bonferroni correction in the full analysis,
- (iv) In the full ‘all other epilepsies’ analysis, significant enlargement of the right amygdala was reported. This enlargement did not survive Bonferroni correction in the 3T-only analysis,

- (v) In the 3T only analysis of 'MTLE-L' versus controls, thickness differences were reported in the right supramarginal gyrus and right rostral middle frontal gyrus; these differences did not survive Bonferroni correction in the full analysis,
- (vi) In the 3T only analysis of 'MTLE-R' versus controls, thickness differences were reported in the left supramarginal, right caudal middle frontal, and right transverse temporal gyri; these differences did not survive Bonferroni correction in the full analysis,
- (vii) In the full analysis of 'MTLE-R' versus controls, thickness differences were reported in the right pars opercularis; these differences did not survive Bonferroni correction in the 3T only analysis (see Supplementary Tables 10-19), and
- (viii) In the 3T-only analysis of 'all other epilepsies', thickness differences were reported in the right rostral middle frontal gyrus; these did not survive Bonferroni correction for multiple comparisons in the full analysis.

All results that were reported as significant in the full analysis, but did not survive Bonferroni correction in the 3T analysis, fell only slightly below the Bonferroni significance threshold in the 3T analysis ( $6 \times 10^{-4} < p < 1.49 \times 10^{-4}$ ). Thus, the marginally different findings observed at 3T field strength can likely be attributed to the lower sample size of the 3T meta-analysis, compared with the full (3T + 1.5T) meta-analysis.

### **Supplementary Note 5. ENIGMA results viewer: Instructions for use**

All regional effect sizes were visualized in a web-based ENIGMA-Viewer (<http://enigma-viewer.org>). The interactive viewer can be loaded in a WebGL-based browser, e.g., Google Chrome ([google.com/chrome](http://google.com/chrome)). The viewer contains a three-dimensional (3D) spatial view and two-dimensional (2D) multiple bar chart views. The bar chart view displays the tables of regional effect sizes. The bars are color coded using a cold-warm color scale to indicate the effect size values. The shared ROI bars across neighboring charts are connected through curves between each bar, which allows users to quickly identify shared ROIs being analyzed. Clicking an ROI in the bar chart view will toggle its 3D representation in the 3D view coded with the same color, allowing users to investigate the spatial relationship among ROIs and their effect sizes. Moving one's mouse over a bar or a 3D region will display the full ROI name and other statistics, such as  $p$  value, on the tooltip.

Users can access the online user guide (<http://enigma-viewer.org/UserGuide.pdf>) for further information on the interactive ENIGMA results viewer.

### **Supplementary Note 6. Additional supplementary materials**

To preserve space, additional supplementary materials (including Forest plots, and the full, FDR-corrected results for the secondary regressions of age at onset and duration of illness) are provided via the ENIGMA-Epilepsy website, at: <http://enigma.ini.usc.edu/ongoing/enigma-epilepsy/enigma-epilepsy-gm/>

**Supplementary Table 1.** Locations/periods of participant recruitment, and details of research ethics committee approval, at each centre.

| Research centre    | Location of recruitment                                                                                                                     | Period of recruitment           | Instrument(s) for diagnosis of epilepsy                                                                          | Research ethics committee (REC) number, if available                                      |
|--------------------|---------------------------------------------------------------------------------------------------------------------------------------------|---------------------------------|------------------------------------------------------------------------------------------------------------------|-------------------------------------------------------------------------------------------|
| <b>Bern</b>        | Inselspital Universitätsspital <b>Bern</b> , Switzerland                                                                                    | 2009 – 2015                     | Review of seizure semiology; ictal/inter-ictal EEG, video-telemetry recordings (where available) and routine MRI | Signed consent forms were acquired to use images for research; no REC number is available |
| <b>Bonn</b>        | University Hospital <b>Bonn</b> , Germany                                                                                                   | July 2006 - December 2011       | Review of seizure semiology; ictal/inter-ictal EEG, video-telemetry recordings (where available) and routine MRI | Signed consent forms were acquired to use images for research; no REC number is available |
| <b>BRI</b>         | Brain Research Institute ( <b>BRI</b> ), Austin Hospital, Melbourne, Australia                                                              | Nov 2007 - Jul 2015             | Review of seizure semiology; ictal/inter-ictal EEG, video-telemetry recordings (where available) and routine MRI | H2008/03296, H2012/04475                                                                  |
| <b>Brussels</b>    | Hospital Erasme, Université libre de Bruxelles, <b>Brussels</b> , Belgium                                                                   | Aug 2005 - Sept 2015            | Review of seizure semiology; ictal/inter-ictal EEG, video-telemetry recordings (where available) and routine MRI | Consent forms were acquired to use images for research; no REC number is available        |
| <b>CUBRIC</b>      | Cardiff University Brain Research Imaging Centre ( <b>CUBRIC</b> ), Cardiff, United Kingdom                                                 | Jun 2009 - May 2015             | Review of seizure semiology; ictal/inter-ictal EEG, video-telemetry recordings (where available) and routine MRI | Southmead Research Ethics Committee, Bristol, UK, Rec Ref : 08/H0102/12                   |
| <b>EKUT_A</b>      | Scanning site "A", Eberhard Karls Universität Tübingen ( <b>EKUT_A</b> ), Germany                                                           | Feb 2011 – Jan 2016             | Review of seizure semiology; ictal/inter-ictal EEG, video-telemetry recordings (where available) and routine MRI | 255/2015A                                                                                 |
| <b>EKUT_B</b>      | Scanning site "B", Eberhard Karls Universität Tübingen ( <b>EKUT_B</b> ), Germany                                                           | Feb 2012 – Nov 2014             | Review of seizure semiology; ictal/inter-ictal EEG, video-telemetry recordings (where available) and routine MRI | 646/2011B01                                                                               |
| <b>EPICZ</b>       | Epilepsy Centre Cantazaro ( <b>EPICZ</b> ), Italy                                                                                           | June 2010 - March 2015          | Seizure semiology; interictal and ictal video-EEG monitoring; MRI                                                | 2010/03/31                                                                                |
| <b>EPIGEN_3.0</b>  | Epilepsy Genetics ( <b>EPIGEN</b> ) Dublin, St. James's Hospital, Dublin, Ireland                                                           | September 2010 – September 2014 | Review of seizure semiology; ictal/inter-ictal EEG, video-telemetry recordings (where available) and routine MRI | 2011/10/01                                                                                |
| <b>EPIGEN_1.5</b>  | Epilepsy Genetics ( <b>EPIGEN</b> ) Dublin, Beaumont Hospital, Dublin, Ireland                                                              | September 2008 – September 2012 | Review of seizure semiology; ictal/inter-ictal EEG, video-telemetry recordings (where available) and routine MRI | 11/97                                                                                     |
| <b>Florence</b>    | University of <b>Florence</b> , Italy                                                                                                       | June 2008 - September 2015      | Review of seizure semiology; ictal/inter-ictal EEG, video-telemetry recordings (where available) and routine MRI | 2013/5/6                                                                                  |
| <b>Greifswald</b>  | Department of Neurology, University Medicine <b>Greifswald</b> , Germany                                                                    | June 2010 - June 2015           | Review of seizure semiology; ictal/inter-ictal EEG, video-telemetry recordings (where available) and routine MRI | Signed consent forms were acquired to use images for research; no REC number is available |
| <b>IDIBAPS-HCB</b> | Institut D'Investigacions Biomèdiques August Pi I Sunyer research center, Hospital Clínic Barcelona ( <b>IDIBAPS-HCB</b> ), Cataluña, Spain | January-2007- July 2015         | Review of seizure semiology; ictal/inter-ictal EEG, video-telemetry recordings (where available) and routine MRI | Consent forms were acquired to use images for research; no REC number is available        |
| <b>KCL_CNS</b>     | King's College London Centre for Neuroimaging sciences ( <b>KCL_CNS</b> ), London, United Kingdom                                           | February 2007 - September 2012  | Review of seizure semiology; ictal/inter-ictal EEG, video-telemetry recordings (where available) and routine MRI | 08/H0808/157                                                                              |
| <b>KCL_CRF</b>     | King's College London Clinical Research Facility ( <b>KCL_CRF</b> ), London,                                                                | July 2013 - May 2015            | Review of seizure semiology; ictal/inter-ictal EEG, video-telemetry recordings (where available) and routine MRI | 12/LO/2006, 14/LO/0193                                                                    |



|                | United Kingdom                                                                                |                             |                                                                                                                                         |                                                                                           |
|----------------|-----------------------------------------------------------------------------------------------|-----------------------------|-----------------------------------------------------------------------------------------------------------------------------------------|-------------------------------------------------------------------------------------------|
| <b>Kuopio</b>  | <b>Kuopio</b> University Hospital, Finland                                                    | April 2010- August 2015     | Review of seizure semiology; ictal/inter-ictal EEG, video-telemetry recordings (where available) and routine MRI                        | 128/13.02.00/2015                                                                         |
| <b>MNI</b>     | Montreal Neurological Institute ( <b>MNI</b> ), McGill University, Montreal, Canada           | August 2008 - April 2015    | Review of seizure semiology; ictal/inter-ictal EEG, video-telemetry recordings, MRI                                                     | NEU-08-001; BERA 2002/1                                                                   |
| <b>NYU</b>     | <b>New York University</b> , New York, USA                                                    | November 2006-June 2015     | Seizure semiology; interictal and ictal video-EEG monitoring; MRI; PET                                                                  | s12-02038; 11224                                                                          |
| <b>RMH</b>     | Royal Melbourne Hospital ( <b>RMH</b> ), Melbourne, Australia                                 | Jan 2008 -Dec 2013          | Review of seizure semiology; ictal/inter-ictal EEG, video-telemetry recordings (where available) and routine MRI, PET (where available) | QA2012044                                                                                 |
| <b>UCSD</b>    | University California San Diego ( <b>UCSD</b> ), California, USA                              | June 2010-September 2015    | Seizure semiology; video-EEG telemetry (scalp and FOs; occasional depths) and routine MRI                                               | 120297                                                                                    |
| <b>UNAM</b>    | Universidad Nacional Autónoma de México ( <b>UNAM</b> ), Campus Juriquilla, Querétaro, México | April 2013-July 2015        | Seizure semiology; interictal scalp EEG; routine MRI                                                                                    | 019.H-RM                                                                                  |
| <b>UNICAMP</b> | Universidade Estadual de Campinas ( <b>UNICAMP</b> ), Brazil                                  | October 2010 - January 2015 | Review of seizure semiology; ictal/inter-ictal EEG, video-telemetry recordings (where available) and routine MRI                        | CEP1158/2009                                                                              |
| <b>UNIMORE</b> | Università degli Studi di Modena ( <b>UNIMORE</b> ), Modena, Italy                            | July 2010-June 2015         | Seizure semiology; ictal/inter-ictal EEG, video-telemetry recordings and routine MRI                                                    | n. 80/10, n. 155/14                                                                       |
| <b>XMU</b>     | Xiamen University ( <b>XMU</b> ), Xiamen, China                                               | November 2012-December 2015 | Seizure semeiology; interictal and ictal video-EEG monitoring; MRI; PET                                                                 | Signed consent forms were acquired to use images for research; no REC number is available |

**Supplementary Table 2.** Breakdown of syndromic diagnoses in the ‘all-epilepsies’ aggregate phenotype group.

| Syndromic diagnosis                                                                                | %           |
|----------------------------------------------------------------------------------------------------|-------------|
| <b>A. Generalised epilepsies</b>                                                                   | <b>17.1</b> |
| Idiopathic / genetic generalised epilepsy, not otherwise specified                                 | 10.8        |
| Absence epilepsy                                                                                   | 2.4         |
| Juvenile myoclonic epilepsy                                                                        | 3.9         |
| <b>B. Focal – temporal lobe epilepsies</b>                                                         | <b>55.8</b> |
| MTLE-HS-L (mesial temporal lobe epilepsy, MTLE, with left hippocampal sclerosis, HS)               | 19.3        |
| MTLE-HS-R (MTLE with right HS)                                                                     | 15.8        |
| MTLE without HS, left-sided seizure onset                                                          | 6.5         |
| MTLE without HS, right-sided seizure onset                                                         | 4.4         |
| MTLE without HS, bilateral seizure onset                                                           | 1.0         |
| MTLE without HS, seizure onset side not established                                                | 8.8         |
| <b>C. Focal – occipital, frontal, or parietal lobe epilepsies, or unspecified focal epilepsies</b> | <b>23.1</b> |
| Occipital lobe epilepsy                                                                            | 0.8         |
| Frontal lobe epilepsy                                                                              | 4.2         |
| Parietal lobe epilepsy                                                                             | 0.4         |
| Unspecified focal epilepsy (Diagnosis of TLE, FLE, OLE or PLE is unclear)                          | 17.7        |
| <b>D. Unclassified or 'other' epilepsies</b>                                                       | <b>4.0</b>  |

**Legend:** (A) 19% of individuals in the aggregated ‘all-epilepsies’ phenotype group were diagnosed with a **generalised epilepsy syndrome**. This generalised group consisted of idiopathic generalised epilepsies (IGE) not otherwise specified (13% of the total all-epilepsies sample), childhood absence epilepsies (CAEs, 2%), and juvenile myoclonic epilepsies (JMEs, 4%). (B) 55% of individuals in the ‘all-epilepsies’ group had a syndromic diagnosis of **mesial temporal lobe epilepsy (MTLE)**. This MTLE sub-group consisted of MTLEs with left hippocampal sclerosis (HS, 19% of the total sample), MTLEs with right HS (16%), MTLEs without HS and without a specified side of seizure onset (8.8%), MTLEs without HS with left-sided onset (7%), MTLEs without HS with right-sided onset (4%), and MTLEs without HS with bilateral seizure onsets (1%). (C) 23% of individuals in the ‘all-epilepsies’ group had a diagnosis of **focal epilepsy other than MTLE**. This included individuals with unspecified forms of focal epilepsy (18% of the total sample), individuals with a diagnosis of frontal lobe epilepsy (FLE, 4%), individuals with a diagnosis of occipital lobe epilepsy (OLE, 0.8%) and individuals with a diagnosis of parietal lobe epilepsy (PLE, 0.4%). (D) 2.2% of the ‘all-epilepsies’ group had an unclassified or ‘other’ diagnosis; this included epilepsies whose syndromic diagnoses could not be classified at the time of analysis (3.5% of the total sample), cases of uncertain diagnosis (four cases of tentative IGE versus JME, one case of IGE versus FLE, and one case of FLE versus MTLE), and other syndromes including childhood absence epilepsy with focal cryptogenic epilepsy (one case), unclassified IGE with focal cryptogenic epilepsy of unknown focus (one case), left HS with focal idiopathic epilepsy of unknown focus (one case), left HS with a frontal posttraumatic lesion (one case), and cryptogenic Lennox-Gastaut syndrome with startle epilepsy (one case).

**Supplementary Table 3.** Image acquisition and processing details by research centre.

| Centre            | Sequence                                                           | Field Strength               | Acquisition Direction | # of Slices | Spacing between slices | Voxel Size (mm <sup>3</sup> )   | TI          | TE         | TR         | Flip Angle | Relevant Citation                                                                                                                                                                                                   |
|-------------------|--------------------------------------------------------------------|------------------------------|-----------------------|-------------|------------------------|---------------------------------|-------------|------------|------------|------------|---------------------------------------------------------------------------------------------------------------------------------------------------------------------------------------------------------------------|
| <b>Bern</b>       | 3D T1-weighted MP-Rage                                             | 3 T Siemens Trio             | Sagittal              | 176         | 0mm                    | 1x1x1mm                         | 900ms       | 2.01ms     | 1500ms     | 9          | Held, Felner et al. (1995). Three-dimensional MP-RAGE – an alternative to conventional three-dimensional FLASH sequences for the diagnosis of viscerocranial tumours? <i>Br. J. Radiol.</i> 68: 1316-1324.          |
| <b>Bonn</b>       | 3D T1-weighted magnetization prepared rapid gradient echo (MPRAGE) | 3T Trio, Siemens             | Coronal               | 160         | 0mm                    | 1x1x1mm                         | 650         | 3.97       | 1300       | 10         | Keller, S.S. et al. (2015). Morphometric MRI Alterations and Postoperative Seizure Control in Refractory Temporal Lobe Epilepsy. <i>Human Brain Mapping</i> , 36:1637-1647.                                         |
| <b>BRI</b>        | 3D T1-weighted magnetization prepared rapid gradient echo (MPRAGE) | 3T TrioTim Siemens           | Sagittal              | 192         | 0mm                    | 0.9mm, iso                      | 900         | 2.6        | 1900       | 9          | Tsai M-H, Pardoe HR, Perchyonok Y, Fitt GJ, Scheffer IE, Jackson GD, Berkovic SF (2013). Etiology of hippocampal sclerosis: evidence for a predisposing familial morphologic anomaly. <i>Neurology</i> 81(2),144-9. |
| <b>Brussels</b>   | sense 3DT1TFE<br>s3DT1TFE                                          | 1.5T Siemens<br>3.0T Siemens | Sagittal<br>Sagittal  | 130<br>160  | 0mm<br>0mm             | 0.87x1.25x1.2mm<br>0.88x1.2x1mm | 880<br>1040 | 4.2<br>4.6 | 8.8<br>9.8 | 8<br>8     |                                                                                                                                                                                                                     |
| <b>CUBRIC</b>     | 3D fast spoiled gradient-recalled (FSPGR)                          | 3T GE HDx                    | Axial                 | 176         | 0mm                    | 1x1x1mm                         | 450         | 3          | 7.9        | 20         |                                                                                                                                                                                                                     |
| <b>EKUT_A</b>     | 3D T1-weighted magnetization prepared rapid gradient echo (MPRAGE) | 3T Siemens Skyra             | Sagittal              | 192         | 0mm                    | 0,9 iso                         | 900         | 2,32       | 2300       | 8          |                                                                                                                                                                                                                     |
| <b>EKUT_B</b>     | 3D T1-weighted magnetization prepared rapid gradient echo (MPRAGE) | 3T Siemens TrioTim           | Sagittal              | 176-<br>192 | 0mm                    | 1 iso                           | 1100        | 3,03       | 2300       | 8          |                                                                                                                                                                                                                     |
| <b>EPICZ</b>      | 3D IR-prepared FSPGR T1-weighted sequence                          | 3 T Discovery MR750 GE       | Sagittal              | 184         | 0mm                    | 1x1x1mm                         | 650ms       | 3.7ms      | 9.2ms      | 12         | Labate, Cherubini, et al. (2015) White matter abnormalities differentiate severe from benign temporal lobe epilepsy. <i>Epilepsia</i> . 2015 Jul;56(7):1109-16                                                      |
| <b>EPIGEN_3.0</b> | 3D T1-weighted turbo field echo sequence                           | 3 T Philips Achieva          | Sagittal              | 160         | 0mm                    | 1x1x1mm                         | -           | 3.9ms      | 8.5ms      | 8          | Alhusaini, Whelan, et al. (2016). Temporal cortex morphology in mesial temporal lobe epilepsy patients and their asymptomatic siblings. <i>Cerebral Cortex</i> , 26(3): 1234-1241.                                  |
| <b>EPIGEN_1.5</b> | 3D T1-weighted spoiled gradient recalled sequence                  | 1.5T GE Signa                | Sagittal              | 124         | 0mm                    | -                               | 450ms       | 4.2ms      | 10.1ms     | 20         | Alhusaini, Scanlon, et al. (2013). Heritability of subcortical volumetric traits in mesial temporal lobe epilepsy. <i>PLoS One</i> , 8(4): e61880.                                                                  |
| <b>Florence</b>   | 3D T1-weighted turbo field echo sequence                           | 3 T Philips Achieva          | Sagittal              | 191         | 1mm                    | 1x1x1mm                         | -           | 3.7ms      | 8.1ms      | 8          |                                                                                                                                                                                                                     |
|                   | 3D T1-weighted turbo field echo sequence                           | 1.5 T Philips                | Sagittal              | 175         | 1mm                    | 1x1x1mm                         | -           | 4.6ms      | 25ms       | 30         |                                                                                                                                                                                                                     |
| <b>Greifswald</b> | 3D T1-weighted magnetization prepared rapid gradient echo          | 3T Verio Siemens             | Sagittal              | 174         | 0mm                    | 0.9                             | 900         | 2.58       | 1900       | 9          |                                                                                                                                                                                                                     |

|                    |                                                                    |                        |          |     |        |               |        |         |         |    |  |                                                                                                                                                                                                  |
|--------------------|--------------------------------------------------------------------|------------------------|----------|-----|--------|---------------|--------|---------|---------|----|--|--------------------------------------------------------------------------------------------------------------------------------------------------------------------------------------------------|
|                    | (MPRAGE)                                                           |                        |          |     |        |               |        |         |         |    |  |                                                                                                                                                                                                  |
| <b>IDIBAPS-HCB</b> | 3D T1-weighted magnetization prepared rapid gradient echo (MPRAGE) | 3T Trio, Siemens       | Coronal  | 192 | 0mm    | 0.9           | 900    | 3.05    | 2000    | 9  |  |                                                                                                                                                                                                  |
| <b>KCL_CNS</b>     | 3D T1-weighted magnetization prepared rapid gradient echo (MPRAGE) | 3T Signa HDx, GE       | Coronal  | 196 | 0mm    | 1.1           | 450    | 2.84    | 7.18    | 20 |  |                                                                                                                                                                                                  |
| <b>KCL_CRF</b>     | 3D T1-weighted magnetization prepared rapid gradient echo (MPRAGE) | 3T MR750, GE           | Sagittal | 196 | 0mm    | 1.05x1.05x1.2 | 400    | 3.016   | 7.312   | 11 |  |                                                                                                                                                                                                  |
| <b>Kuopio</b>      | 3D T1-weighted turbo field echo sequence                           | 3 T Philips Achieva    | Sagittal | 190 | 0mm    | 1x1x1mm       | -      | 3.7ms   | 8.2ms   | 8  |  |                                                                                                                                                                                                  |
| <b>MNI</b>         | 3D T1-weighted magnetization prepared rapid gradient echo (MPRAGE) | 3T Trio, Siemens       | Sagittal | 176 | 0      | 1x1x1mm       | 900    | 2.98    | 2300    | 9  |  | Hong SJ, Bernhardt BC, Schrader DS, Bernasconi N1, Bernasconi A. Whole-brain MRI phenotyping in dysplasia-related frontal lobe epilepsy; <i>Neurology</i> 2016; doi 10.1212/WNL.0000000000002374 |
| <b>NYU</b>         | 3D T1-weighted magnetization prepared rapid gradient echo (MPRAGE) | 3T Allegra, Siemens    | Sagittal | 128 | 1.3 mm | 1x1x1.3mm     | 1.1 ms | 3.25ms  | 2530 ms | 7  |  | Reyes A, et al. Resting stats fMRI distinguishes temporal lobe epilepsy subtypes. <i>Epilepsia</i> . 2016 doi: 10.1111/epi.13456.                                                                |
| <b>RMH</b>         | 3D T1-weighted magnetization prepared rapid gradient echo (MPRAGE) | 3T Trio, Siemens       | Coronal  | 192 | 0mm    | 0.9           | 900    | 2.21    | 1900    | 9  |  |                                                                                                                                                                                                  |
| <b>UCSD</b>        | 3D T1-weighted IR-FSPGR sequence                                   | 3 T Discovery MR750 GE | Sagittal | 172 | 0mm    | 1x1x1mm       | 600ms  | 3.16ms  | 8.08    | 8  |  | Kemmotsu, Kucukboyaci et al. (2014). Frontolimbic brain networks predict depressive symptoms in temporal lobe epilepsy. <i>Epilepsy Research</i> , 108(9), 1554-1563.                            |
| <b>UNAM</b>        | 3D T1-weighted turbo field echo sequence                           | 3 T Philips Achieva    | Sagittal | 186 | 0 mm   | 1x1x1mm       |        | 3.69 ms | 8.06 ms | 8  |  |                                                                                                                                                                                                  |
| <b>UNICAMP</b>     | 3D T1-weighted turbo field echo sequence                           | 3 T Philips Achieva    | Sagittal | 180 | 0mm    | 1x1x1mm       | -      | 3.2     | 7       | 8  |  | de Campos BM, Coan AC, Lin Yasuda C, Casseb RF, Cendes F. Large-scale brain networks are distinctly affected in right and left mesial temporal lobe epilepsy <i>Hum Brain Mapp</i> . 2016 May 2. |
| <b>UNIMORE</b>     | 3D T1-weighted turbo field echo sequence                           | 3 T Philips Achieva    | Sagittal | 170 | 0 mm   | 1x1x1mm       | -      | 4.6 ms  | 9.9 ms  | 8  |  | Vaudano, Ruggieri, Tondelli, et al (2014). The visual system in eyelid myoclonia with absences. <i>Ann Neurol</i> . 2014 Sep;76(3):412-27                                                        |
| <b>XMU</b>         | 3D IR-prepared FSPGR T1-weighted sequence                          | 3 T GE                 | Axial    | 156 | 1.2mm  | 1.2x1.2x1.2mm | 450ms  | 3.2ms   | 8.2ms   | 12 |  |                                                                                                                                                                                                  |

**Supplementary Table 4.** Full list of cortical regions of interest, as extracted using FreeSurfer v5.3.0, with abbreviations.

| <b>Structure</b>                      | <b>Hemisphere</b> | <b>FreeSurfer abbreviation</b> | <b>Hemisphere</b> | <b>FreeSurfer abbreviation</b> |
|---------------------------------------|-------------------|--------------------------------|-------------------|--------------------------------|
| Banks of the superior temporal sulcus | Left              | L_bankssts                     | Right             | R_bankssts                     |
| Caudal anterior cingulate             | Left              | L_caudalanteriorcingulate      | Right             | R_caudalanteriorcingulate      |
| Caudal middle frontal gyrus           | Left              | L_caudalmiddlefrontal          | Right             | R_caudalmiddlefrontal          |
| Cuneus                                | Left              | L_cuneus                       | Right             | R_cuneus                       |
| Entorhinal gyrus                      | Left              | L_entorhinal                   | Right             | R_entorhinal                   |
| Fusiform gyrus                        | Left              | L_fusiform                     | Right             | R_fusiform                     |
| Inferior parietal gyrus               | Left              | L_inferiorparietal             | Right             | R_inferiorparietal             |
| Inferior temporal gyrus               | Left              | L_inferiortemporal             | Right             | R_inferiortemporal             |
| Isthmus cingulate                     | Left              | L_isthmuscingulate             | Right             | R_isthmuscingulate             |
| Lateral occipital gyrus               | Left              | L_lateraloccipital             | Right             | R_lateraloccipital             |
| Lateral orbitofrontal gyrus           | Left              | L_lateralorbitofrontal         | Right             | R_lateralorbitofrontal         |
| Lingual gyrus                         | Left              | L_lingual                      | Right             | R_lingual                      |
| Medial orbitofrontal gyrus            | Left              | L_medialorbitofrontal          | Right             | R_medialorbitofrontal          |
| Middle temporal gyrus                 | Left              | L_middletemporal               | Right             | R_middletemporal               |
| Parahippocampal gyrus                 | Left              | L parahippocampal              | Right             | R parahippocampal              |
| Paracentral gyrus                     | Left              | L_paracentral                  | Right             | R_paracentral                  |
| <i>Pars opercularis</i>               | Left              | L_parsopercularis              | Right             | R_parsopercularis              |
| <i>Pars orbitalis</i>                 | Left              | L_parsorbitalis                | Right             | R_parsorbitalis                |
| <i>Pars triangularis</i>              | Left              | L_parstriangularis             | Right             | R_parstriangularis             |
| Pericalcarine gyrus                   | Left              | L_pericalcarine                | Right             | R_pericalcarine                |
| Postcentral gyrus                     | Left              | L_postcentral                  | Right             | R_postcentral                  |
| Posterior cingulate gyrus             | Left              | L_posteriorcingulate           | Right             | R_posteriorcingulate           |
| Precentral gyrus                      | Left              | L_precentral                   | Right             | R_precentral                   |
| Precuneus                             | Left              | L_precuneus                    | Right             | R_precuneus                    |
| Rostral anterior cingulate            | Left              | L_rostralanteriorcingulate     | Right             | R_rostralanteriorcingulate     |
| Rostral middle frontal gyrus          | Left              | L_rostralmiddlefrontal         | Right             | R_rostralmiddlefrontal         |
| Superior frontal gyrus                | Left              | L_superiorfrontal              | Right             | R_superiorfrontal              |
| Superior parietal gyrus               | Left              | L_superiorparietal             | Right             | R_superiorparietal             |
| Superior temporal gyrus               | Left              | L_superiortemporal             | Right             | R_superiortemporal             |
| Supramarginal gyrus                   | Left              | L_supramarginal                | Right             | R_supramarginal                |
| Frontal pole                          | Left              | L_frontalpole                  | Right             | R_frontalpole                  |
| Temporal pole                         | Left              | L_temporalpole                 | Right             | R_temporalpole                 |
| Transverse temporal gyrus             | Left              | L_transversetemporal           | Right             | R_transversetemporal           |
| Insula                                | Left              | L_insula                       | Right             | R_insula                       |

**Supplementary Table 5.** Results of t-test for age differences, and chi-squared test for sex differences at each research centre.

| Research centre | <i>T-test for age differences</i> |                |             |                              | <i>Chi squared test for sex differences</i> |              |
|-----------------|-----------------------------------|----------------|-------------|------------------------------|---------------------------------------------|--------------|
|                 | Difference of means               | Standard error | T-statistic | P-value                      | Pearson $\chi(1)$ chi-square value          | P-value      |
| Bern            | -2.0179                           | 1.7209         | 1.1725      | 0.2434                       | <b>0.086</b>                                | <b>0.77</b>  |
| Bonn            | -0.4410                           | 1.9861         | -0.2220     | 0.8246                       | <b>0.969</b>                                | <b>0.325</b> |
| BRI             | -1.4505                           | 1.5569         | -0.9316     | 0.3529                       | <b>3.844</b>                                | <b>0.049</b> |
| Brussels        | 7.1588                            | 1.2681         | 5.6453      | <b>1.10x10<sup>-7</sup></b>  | <b>2.643</b>                                | <b>0.104</b> |
| CUBRIC          | 0.3750                            | 1.6558         | 0.2265      | 0.8213                       | <b>0.000</b>                                | <b>1</b>     |
| EKUT_A          | -1.2419                           | 2.2919         | -0.5418     | 0.5892                       | <b>0.275</b>                                | <b>0.6</b>   |
| EKUT_B          | -4.2083                           | 3.6302         | -1.1593     | 0.2545                       | <b>1.418</b>                                | <b>0.234</b> |
| EPICZ           | -0.6238                           | 1.3679         | -0.4560     | 0.6488                       | <b>3.342</b>                                | <b>0.068</b> |
| EPIGEN_3.0      | 1.4550                            | 1.6612         | 0.8759      | 0.3828                       | <b>3.149</b>                                | <b>0.076</b> |
| EPIGEN_1.5      | 5.4940                            | 2.0075         | 2.7367      | <b>0.0074</b>                | <b>4.576</b>                                | <b>0.032</b> |
| Florence        | -7.2857                           | 2.6622         | -2.7368     | <b>0.0117</b>                | <b>1.327</b>                                | <b>0.204</b> |
| Greifswald      | 16.0241                           | 2.5122         | 6.3786      | <b>8.04x10<sup>-8</sup></b>  | <b>0.527</b>                                | <b>0.468</b> |
| IDIBAPS-HCP     | 3.6393                            | 1.2159         | 2.9930      | <b>0.0032</b>                | <b>0.091</b>                                | <b>0.763</b> |
| KCL_CNS         | 1.5147                            | 1.2347         | 1.2268      | 0.2214                       | <b>0.052</b>                                | <b>0.82</b>  |
| KCL_CRF         | 2.7359                            | 3.3470         | 0.8174      | 0.4222                       | <b>1.139</b>                                | <b>0.286</b> |
| Kuopio          | 8.1876                            | 0.7482         | 10.9429     | <b>2.75x10<sup>-23</sup></b> | <b>1.035</b>                                | <b>0.309</b> |
| MNI             | 1.9223                            | 1.3958         | 1.3772      | 0.1714                       | <b>1.214</b>                                | <b>0.271</b> |
| NYU             | 3.1310                            | 1.2236         | 2.5588      | <b>0.0111</b>                | <b>0.972</b>                                | <b>0.324</b> |
| RMH             | -0.7326                           | 4.1484         | -0.1766     | 0.8609                       | <b>0.508</b>                                | <b>0.476</b> |
| UCSD            | 0.7825                            | 3.0656         | 0.2553      | 0.7993                       | <b>0.500</b>                                | <b>0.479</b> |
| UNAM            | -1.7278                           | 2.8626         | -0.6036     | 0.5481                       | <b>0.188</b>                                | <b>0.664</b> |
| UNICAMP         | 5.5959                            | 0.7979         | 7.0137      | <b>5.98x10<sup>-12</sup></b> | <b>0.000</b>                                | <b>0.995</b> |
| UNIMORE         | -0.1047                           | 1.4477         | -0.0723     | 0.9425                       | <b>0.022</b>                                | <b>0.881</b> |
| XMU             | -2.7454                           | 2.2762         | -1.2061     | 0.2405                       | <b>0.515</b>                                | <b>0.473</b> |

**Supplementary Table 6.** Effect sizes for volume differences (Cohen's *d*) between healthy controls and a subgroup of the 'all-epilepsies' phenotype, without evidence of hippocampal sclerosis or other lesions on MRI, controlling for age, sex, and intracranial volume.

| Structure                      | Cohen's <i>d</i> | SE          | Z score      | 95% CI               | <i>P</i> value              | FDR-adjusted <i>P</i> value | <i>I</i> <sup>2</sup> | Number of controls | Number of cases |
|--------------------------------|------------------|-------------|--------------|----------------------|-----------------------------|-----------------------------|-----------------------|--------------------|-----------------|
| <b>Thalamus (RH)</b>           | <b>-0.29</b>     | <b>0.05</b> | <b>-5.88</b> | <b>-0.39 - -0.19</b> | <b>3.98x10<sup>-9</sup></b> | <b>6.69X10<sup>-8</sup></b> | <b>6.28</b>           | <b>1367</b>        | <b>938</b>      |
| Pallidum (RH)                  | -0.22            | 0.06        | -3.42        | -0.35 - -0.09        | 6.33x10 <sup>-4</sup>       | 2.13X10 <sup>-3</sup>       | 40.52                 | 1361               | 916             |
| Pallidum (LH)                  | -0.19            | 0.10        | -1.98        | -0.38 - -0.002       | 4.82x10 <sup>-2</sup>       | <b>8.43X10<sup>-2</sup></b> | 71.94                 | 1260               | 843             |
| Putamen (LH)                   | -0.17            | 0.09        | -1.89        | -0.34 - 0.006        | 5.85x10 <sup>-2</sup>       | <b>9.83X10<sup>-2</sup></b> | 67.19                 | 1287               | 895             |
| Thalamus (LH)                  | -0.16            | 0.08        | -2.09        | -0.31 - -0.010       | 3.64x10 <sup>-2</sup>       | <b>6.79X10<sup>-2</sup></b> | 57.99                 | 1338               | 933             |
| Putamen (RH)                   | -0.14            | 0.09        | -1.58        | -0.32 - 0.034        | 1.14x10 <sup>-1</sup>       | 1.65X10 <sup>-1</sup>       | 69.77                 | 1341               | 933             |
| Caudate (LH)                   | -0.07            | 0.06        | -1.11        | -0.19- 0.0537        | 2.68x10 <sup>-1</sup>       | 3.31X10 <sup>-1</sup>       | 38.24                 | 1374               | 935             |
| Hippocampus (RH)               | -0.05            | 0.05        | -1.00        | -0.15 - 0.05         | 3.18x10 <sup>-1</sup>       | 3.87X10 <sup>-1</sup>       | 14.84                 | 1369               | 931             |
| Hippocampus (LH)               | -0.02            | 0.06        | -0.32        | -0.14 - 0.1          | 7.49x10 <sup>-1</sup>       | 8.17X10 <sup>-1</sup>       | 34.01                 | 1358               | 928             |
| Accumbens (LH)                 | 0.00             | 0.11        | 0.01         | -0.2 - 0.2           | 9.90x10 <sup>-1</sup>       | 9.90X10 <sup>-1</sup>       | 77.27                 | 1358               | 936             |
| Caudate (RH)                   | 0.01             | 0.07        | 0.16         | -0.12 - 0.14         | 8.74x10 <sup>-1</sup>       | 9.18X10 <sup>-1</sup>       | 45.19                 | 1375               | 937             |
| Accumbens (RH)                 | 0.06             | 0.12        | 0.48         | -0.17 - 0.28         | 6.34x10 <sup>-1</sup>       | 7.50X10 <sup>-1</sup>       | 81.55                 | 1352               | 937             |
| Lateral ventricle (LH)         | 0.19             | 0.05        | 4.02         | 0.01 - 0.29          | 5.70x10 <sup>-5</sup>       | 2.52X10 <sup>-4</sup>       | 1.68                  | 1373               | 936             |
| <b>Lateral ventricle (RH)*</b> | <b>0.22</b>      | <b>0.05</b> | <b>4.33</b>  | <b>0.12 - 0.32</b>   | <b>1.48x10<sup>-5</sup></b> | <b>8.29X10<sup>-5</sup></b> | <b>8.72</b>           | <b>1374</b>        | <b>936</b>      |
| Amygdala (RH)*                 | 0.24             | 0.06        | 3.75         | 0.11 - 0.37          | 1.78x10 <sup>-4</sup>       | 6.80X10 <sup>-4</sup>       | 38.90                 | 1343               | 929             |
| <b>Amygdala (LH)*</b>          | <b>0.33</b>      | <b>0.07</b> | <b>4.62</b>  | <b>0.19 - 0.47</b>   | <b>3.85x10<sup>-6</sup></b> | <b>2.94X10<sup>-5</sup></b> | <b>51.24</b>          | <b>1367</b>        | <b>938</b>      |

**Abbreviations:** RH, right hemisphere, LH, left hemisphere, SE, standard error; CI, confidence interval; *I*<sup>2</sup>, heterogeneity index. Uncorrected *p*-values are reported. Brain regions are ranked according to effect size (negative to positive). *P*-values were compared to an adjusted alpha level of  $p < 1.49 \times 10^{-4}$ . Significant brain regions are **highlighted in red with an asterisk (\*)**.

**Supplementary Table 7.** Effect sizes for cortical thickness differences (Cohen's *d*) between healthy controls and a subgroup of the 'all-epilepsies' phenotype, without evidence of hippocampal sclerosis or other lesions on MRI, controlling for age, sex, and intracranial volume.

| Structure                    | Cohen's <i>d</i> | SE          | Z score      | 95% CI               | <i>P</i> value               | FDR-adjusted<br><i>P</i> value | <i>f</i> <sup>2</sup> | Number of<br>controls | Number of<br>cases |
|------------------------------|------------------|-------------|--------------|----------------------|------------------------------|--------------------------------|-----------------------|-----------------------|--------------------|
| <b>L_precentral</b>          | <b>-0.37</b>     | <b>0.05</b> | <b>-7.79</b> | <b>-0.46 - -0.28</b> | <b>6.47x10<sup>-15</sup></b> | <b>5.43X10<sup>-13</sup></b>   | <b>0.00</b>           | <b>1370</b>           | <b>936</b>         |
| <b>R_paracental</b>          | <b>-0.35</b>     | <b>0.05</b> | <b>-7.41</b> | <b>-0.44 - -0.26</b> | <b>1.27x10<sup>-13</sup></b> | <b>5.33X10<sup>-12</sup></b>   | <b>0.00</b>           | <b>1379</b>           | <b>937</b>         |
| <b>R_precentral</b>          | <b>-0.34</b>     | <b>0.05</b> | <b>-7.21</b> | <b>-0.43 - -0.25</b> | <b>5.48x10<sup>-13</sup></b> | <b>1.53X10<sup>-11</sup></b>   | <b>0.00</b>           | <b>1374</b>           | <b>935</b>         |
| <b>L_caudalmiddlefrontal</b> | <b>-0.29</b>     | <b>0.05</b> | <b>-6.13</b> | <b>-0.38 - -0.2</b>  | <b>8.65x10<sup>-10</sup></b> | <b>1.82X10<sup>-8</sup></b>    | <b>0.00</b>           | <b>1375</b>           | <b>939</b>         |
| <b>L_paracental</b>          | <b>-0.26</b>     | <b>0.05</b> | <b>-5.42</b> | <b>-0.35 - -0.16</b> | <b>5.85x10<sup>-8</sup></b>  | <b>8.19X10<sup>-7</sup></b>    | <b>0.00</b>           | <b>1375</b>           | <b>939</b>         |
| <b>R_superiorfrontal</b>     | <b>-0.24</b>     | <b>0.06</b> | <b>-4.38</b> | <b>-0.35 - -0.14</b> | <b>1.19x10<sup>-5</sup></b>  | <b>7.38X10<sup>-5</sup></b>    | <b>23.10</b>          | <b>1375</b>           | <b>936</b>         |
| <b>L_superiorfrontal</b>     | <b>-0.24</b>     | <b>0.06</b> | <b>-3.97</b> | <b>-0.36 - -0.12</b> | <b>7.34x10<sup>-5</sup></b>  | <b>3.08X10<sup>-4</sup></b>    | <b>34.93</b>          | <b>1374</b>           | <b>938</b>         |
| <b>R_precuneus</b>           | <b>-0.23</b>     | <b>0.06</b> | <b>-4.08</b> | <b>-0.34 - -0.12</b> | <b>4.46x10<sup>-5</sup></b>  | <b>2.34X10<sup>-4</sup></b>    | <b>25.71</b>          | <b>1379</b>           | <b>933</b>         |
| <b>R_caudalmiddlefrontal</b> | <b>-0.23</b>     | <b>0.05</b> | <b>-4.88</b> | <b>-0.32 - -0.14</b> | <b>1.04x10<sup>-6</sup></b>  | <b>1.25X10<sup>-5</sup></b>    | <b>0.00</b>           | <b>1378</b>           | <b>937</b>         |
| <b>R_parstriangularis</b>    | <b>-0.23</b>     | <b>0.05</b> | <b>-4.37</b> | <b>-0.33 - -0.13</b> | <b>1.23x10<sup>-5</sup></b>  | <b>7.38X10<sup>-5</sup></b>    | <b>13.47</b>          | <b>1377</b>           | <b>937</b>         |
| <b>R_cuneus</b>              | <b>-0.22</b>     | <b>0.05</b> | <b>-4.73</b> | <b>-0.31 - -0.13</b> | <b>2.29x10<sup>-6</sup></b>  | <b>2.40X10<sup>-5</sup></b>    | <b>0.00</b>           | <b>1377</b>           | <b>935</b>         |
| L_transversetemporal         | -0.22            | 0.06        | -3.59        | -0.34 - -0.1         | 3.33x10 <sup>-4</sup>        | <b>1.22X10<sup>-3</sup></b>    | 35.24                 | 1372                  | 939                |
| <b>L_superiorparietal</b>    | <b>-0.22</b>     | <b>0.05</b> | <b>-4.69</b> | <b>-0.31 - -0.13</b> | <b>2.68x10<sup>-6</sup></b>  | <b>2.50X10<sup>-5</sup></b>    | <b>0.01</b>           | <b>1374</b>           | <b>936</b>         |
| <b>R_lateraloccipital</b>    | <b>-0.22</b>     | <b>0.05</b> | <b>-4.66</b> | <b>-0.31 - -0.13</b> | <b>3.22x10<sup>-6</sup></b>  | <b>2.70X10<sup>-5</sup></b>    | <b>0.00</b>           | <b>1378</b>           | <b>936</b>         |
| R_entorhinal                 | -0.22            | 0.06        | -3.39        | -0.34 - -0.09        | 6.90x10 <sup>-4</sup>        | <b>2.15X10<sup>-3</sup></b>    | 28.82                 | 1110                  | 840                |
| <b>R_superiorparietal</b>    | <b>-0.22</b>     | <b>0.05</b> | <b>-4.40</b> | <b>-0.31 - -0.12</b> | <b>1.09x10<sup>-5</sup></b>  | <b>7.38X10<sup>-5</sup></b>    | <b>5.32</b>           | <b>1378</b>           | <b>936</b>         |
| R_lateralorbitofrontal       | -0.21            | 0.07        | -3.16        | -0.34 - -0.08        | 1.55x10 <sup>-3</sup>        | <b>4.34X10<sup>-3</sup></b>    | 43.69                 | 1376                  | 935                |
| R_rostralmiddlefrontal       | -0.20            | 0.06        | -3.40        | -0.32 - -0.09        | 6.70x10 <sup>-4</sup>        | <b>2.15X10<sup>-3</sup></b>    | 32.06                 | 1379                  | 936                |
| L_precuneus                  | -0.20            | 0.05        | -3.57        | -0.3 - -0.09         | 3.55x10 <sup>-4</sup>        | <b>1.24X10<sup>-3</sup></b>    | 20.91                 | 1374                  | 937                |
| <b>R_supramarginal</b>       | <b>-0.20</b>     | <b>0.05</b> | <b>-4.03</b> | <b>-0.29 - -0.1</b>  | <b>5.59x10<sup>-5</sup></b>  | <b>2.52X10<sup>-4</sup></b>    | <b>0.00</b>           | <b>1322</b>           | <b>900</b>         |



|                             |              |             |              |                      |                             |                             |             |             |            |
|-----------------------------|--------------|-------------|--------------|----------------------|-----------------------------|-----------------------------|-------------|-------------|------------|
| <b>R_lingual</b>            | <b>-0.19</b> | <b>0.05</b> | <b>-4.05</b> | <b>-0.28 - -0.1</b>  | <b>5.09x10<sup>-5</sup></b> | <b>2.52X10<sup>-4</sup></b> | <b>0.00</b> | <b>1378</b> | <b>935</b> |
| <b>R_transversetemporal</b> | <b>-0.19</b> | <b>0.05</b> | <b>-3.95</b> | <b>-0.28 - -0.09</b> | <b>7.71x10<sup>-5</sup></b> | <b>3.08X10<sup>-4</sup></b> | <b>0.01</b> | <b>1379</b> | <b>937</b> |
| R_parsorbitalis             | -0.18        | 0.06        | -3.21        | -0.29 - -0.07        | 1.34x10 <sup>-3</sup>       | <b>3.88X10<sup>-3</sup></b> | 25.94       | 1379        | 935        |
| R_pericalcarine             | -0.17        | 0.05        | -3.27        | -0.27 - -0.07        | 1.09x10 <sup>-3</sup>       | <b>3.27X10<sup>-3</sup></b> | 11.71       | 1379        | 936        |
| L_lateraloccipital          | -0.15        | 0.05        | -3.06        | -0.25 - -0.06        | 2.18x10 <sup>-3</sup>       | <b>5.91X10<sup>-3</sup></b> | 8.76        | 1375        | 939        |
| L_pericalcarine             | -0.15        | 0.06        | -2.51        | -0.27 - -0.03        | 1.22x10 <sup>-2</sup>       | <b>2.77X10<sup>-2</sup></b> | 31.78       | 1375        | 938        |
| R_superiortemporal          | -0.15        | 0.07        | -2.25        | -0.28 - -0.02        | 2.44x10 <sup>-2</sup>       | <b>4.79X10<sup>-2</sup></b> | 39.82       | 1282        | 898        |
| L_cuneus                    | -0.15        | 0.05        | -2.81        | -0.25 - -0.04        | 4.88x10 <sup>-3</sup>       | <b>1.21X10<sup>-2</sup></b> | 15.45       | 1373        | 939        |
| R_temporalpole              | -0.15        | 0.05        | -2.95        | -0.24 - -0.05        | 3.19x10 <sup>-3</sup>       | <b>8.32X10<sup>-3</sup></b> | 6.72        | 1375        | 934        |
| L_entorhinal                | -0.14        | 0.09        | -1.60        | -0.32 - 0.03         | 1.09x10 <sup>-1</sup>       | 1.61X10 <sup>-1</sup>       | 63.11       | 1132        | 852        |
| L_parstriangularis          | -0.14        | 0.05        | -2.94        | -0.23 - -0.05        | 3.27x10 <sup>-3</sup>       | <b>8.32X10<sup>-3</sup></b> | 0.01        | 1375        | 939        |
| L_fusiform                  | -0.13        | 0.06        | -2.26        | -0.24 - -0.02        | 2.41x10 <sup>-2</sup>       | <b>4.79X10<sup>-2</sup></b> | 27.43       | 1372        | 938        |
| R_fusiform                  | -0.13        | 0.07        | -1.88        | -0.26 - 0.01         | 5.98x10 <sup>-2</sup>       | 9.85X10 <sup>-2</sup>       | 45.10       | 1379        | 936        |
| L_supramarginal             | -0.12        | 0.06        | -2.08        | -0.24 - -0.01        | 3.78x10 <sup>-2</sup>       | 6.90X10 <sup>-2</sup>       | 27.53       | 1331        | 900        |
| L_parsorbitalis             | -0.12        | 0.05        | -2.60        | -0.21 - -0.03        | 9.39x10 <sup>-3</sup>       | <b>2.25X10<sup>-2</sup></b> | 0.00        | 1375        | 938        |
| L_lingual                   | -0.12        | 0.05        | -2.56        | -0.21 - -0.03        | 1.05x10 <sup>-2</sup>       | <b>2.45X10<sup>-2</sup></b> | 0.00        | 1374        | 939        |
| L_temporalpole              | -0.12        | 0.07        | -1.65        | -0.26 - 0.02         | 9.86x10 <sup>-2</sup>       | 1.51X10 <sup>-1</sup>       | 52.42       | 1369        | 936        |
| R_middletemporal            | -0.12        | 0.05        | -2.46        | -0.21 - -0.02        | 1.37x10 <sup>-2</sup>       | <b>3.03X10<sup>-2</sup></b> | 0.01        | 1368        | 932        |
| L_rostralmiddlefrontal      | -0.12        | 0.07        | -1.76        | -0.24 - 0.01         | 7.82x10 <sup>-2</sup>       | 1.22X10 <sup>-1</sup>       | 42.84       | 1374        | 938        |
| R_parsopercularis           | -0.12        | 0.05        | -2.29        | -0.21 - -0.02        | 2.20x10 <sup>-2</sup>       | 4.74X10 <sup>-2</sup>       | 9.54        | 1377        | 937        |
| L_parsopercularis           | -0.11        | 0.05        | -2.25        | -0.21 - -0.01        | 2.45x10 <sup>-2</sup>       | 4.79X10 <sup>-2</sup>       | 10.79       | 1373        | 938        |
| R_medialorbitofrontal       | -0.11        | 0.06        | -1.84        | -0.22 - 0.01         | 6.62x10 <sup>-2</sup>       | 1.07X10 <sup>-1</sup>       | 28.75       | 1361        | 912        |
| R_frontalpole               | -0.11        | 0.05        | -2.26        | -0.2 - -0.01         | 2.39x10 <sup>-2</sup>       | <b>4.79X10<sup>-2</sup></b> | 0.00        | 1379        | 936        |
| L_posteriorcingulate        | -0.11        | 0.07        | -1.57        | -0.24 - 0.03         | 1.17x10 <sup>-1</sup>       | 1.65X10 <sup>-1</sup>       | 45.74       | 1375        | 938        |
| L_superiortemporal          | -0.10        | 0.06        | -1.63        | -0.23 - 0.02         | 1.04x10 <sup>-1</sup>       | 1.56X10 <sup>-1</sup>       | 36.71       | 1262        | 894        |
| R_inferiorparietal          | -0.10        | 0.05        | -2.04        | -0.2 - 0             | 4.11x10 <sup>-2</sup>       | 7.35X10 <sup>-2</sup>       | 10.41       | 1368        | 928        |
| R parahippocampal           | -0.10        | 0.05        | -2.10        | -0.19 - -0.01        | 3.61x10 <sup>-2</sup>       | 6.79X10 <sup>-2</sup>       | 0.00        | 1375        | 935        |
| L_frontalpole               | -0.10        | 0.05        | -1.97        | -0.2 - 0             | 4.92x10 <sup>-2</sup>       | 8.43X10 <sup>-2</sup>       | 8.99        | 1373        | 938        |
| L_isthmuscingulate          | -0.09        | 0.06        | -1.52        | -0.22 - 0.03         | 1.28x10 <sup>-1</sup>       | 1.73X10 <sup>-1</sup>       | 36.55       | 1374        | 937        |

|                            |       |      |       |              |                       |                       |       |      |     |
|----------------------------|-------|------|-------|--------------|-----------------------|-----------------------|-------|------|-----|
| R_bankssts                 | -0.08 | 0.06 | -1.41 | -0.2 - 0.03  | 1.57x10 <sup>-1</sup> | 2.03X10 <sup>-1</sup> | 31.10 | 1349 | 922 |
| L_inferiorparietal         | -0.08 | 0.05 | -1.80 | -0.18 - 0.01 | 7.24x10 <sup>-2</sup> | 1.15X10 <sup>-1</sup> | 0.00  | 1364 | 934 |
| L_lateralorbitofrontal     | -0.08 | 0.07 | -1.15 | -0.22 - 0.06 | 2.48x10 <sup>-1</sup> | 3.11X10 <sup>-1</sup> | 48.77 | 1370 | 938 |
| R_inferiortemporal         | -0.08 | 0.05 | -1.56 | -0.18 - 0.02 | 1.18x10 <sup>-1</sup> | 1.65X10 <sup>-1</sup> | 9.50  | 1377 | 935 |
| R_insula                   | -0.07 | 0.05 | -1.54 | -0.17 - 0.02 | 1.24x10 <sup>-1</sup> | 1.71X10 <sup>-1</sup> | 0.01  | 1340 | 929 |
| L_postcentral              | -0.07 | 0.05 | -1.50 | -0.16 - 0.02 | 1.32x10 <sup>-1</sup> | 1.76X10 <sup>-1</sup> | 1.57  | 1372 | 936 |
| L_middletemporal           | -0.07 | 0.05 | -1.47 | -0.17 - 0.02 | 1.42x10 <sup>-1</sup> | 1.86X10 <sup>-1</sup> | 0.01  | 1276 | 901 |
| R_posteriorcingulate       | -0.06 | 0.07 | -0.96 | -0.2 - 0.07  | 3.36x10 <sup>-1</sup> | 4.03X10 <sup>-1</sup> | 44.56 | 1379 | 937 |
| L parahippocampal          | -0.06 | 0.05 | -1.27 | -0.15 - 0.03 | 2.05x10 <sup>-1</sup> | 2.61X10 <sup>-1</sup> | 0.00  | 1362 | 934 |
| L_rostralanteriorcingulate | -0.03 | 0.07 | -0.40 | -0.18 - 0.12 | 6.88x10 <sup>-1</sup> | 7.92X10 <sup>-1</sup> | 54.98 | 1370 | 933 |
| L_inferiortemporal         | -0.02 | 0.06 | -0.32 | -0.14 - 0.1  | 7.46x10 <sup>-1</sup> | 8.17X10 <sup>-1</sup> | 32.90 | 1374 | 934 |
| L_medialorbitofrontal      | -0.02 | 0.05 | -0.37 | -0.11 - 0.08 | 7.14x10 <sup>-1</sup> | 8.04X10 <sup>-1</sup> | 2.06  | 1357 | 914 |
| R_postcentral              | -0.02 | 0.05 | -0.36 | -0.11 - 0.08 | 7.18x10 <sup>-1</sup> | 8.04X10 <sup>-1</sup> | 0.02  | 1373 | 935 |
| R_caudalanteriorcingulate  | -0.01 | 0.05 | -0.27 | -0.12 - 0.09 | 7.87x10 <sup>-1</sup> | 8.48X10 <sup>-1</sup> | 16.26 | 1377 | 936 |
| R_isthmuscingulate         | -0.01 | 0.06 | -0.16 | -0.12 - 0.1  | 8.71x10 <sup>-1</sup> | 9.18X10 <sup>-1</sup> | 27.31 | 1376 | 936 |
| L_insula                   | 0.00  | 0.05 | -0.06 | -0.11 - 0.1  | 9.55x10 <sup>-1</sup> | 9.67X10 <sup>-1</sup> | 18.38 | 1335 | 924 |
| L_bankssts                 | 0.00  | 0.07 | 0.07  | -0.13 - 0.14 | 9.46x10 <sup>-1</sup> | 9.67X10 <sup>-1</sup> | 40.59 | 1314 | 882 |
| R_rostralanteriorcingulate | 0.01  | 0.07 | 0.09  | -0.14 - 0.15 | 9.30x10 <sup>-1</sup> | 9.64X10 <sup>-1</sup> | 53.44 | 1377 | 935 |
| L_caudalanteriorcingulate  | 0.02  | 0.05 | 0.46  | -0.08 - 0.13 | 6.47x10 <sup>-1</sup> | 7.55X10 <sup>-1</sup> | 13.57 | 1370 | 926 |

**Abbreviations:** RH, right hemisphere, LH, left hemisphere, SE, standard error; CI, confidence interval;  $I^2$ , heterogeneity index. Abbreviations for all cortical brain regions are provided in Supplementary Table 4. Uncorrected  $p$ -values are reported. Brain regions are ranked according to effect size (negative to positive).  $P$ -values were compared to a Bonferroni-adjusted alpha level of  $p < 1.49 \times 10^{-4}$ . Brain regions exhibiting statistically significant case-control differences are **highlighted in red with an asterisk (\*)**. FDR-significant  $p$ -values are **highlighted in bold**.

**Supplementary Table 8.** Beta coefficients, standard errors and *P*-values for the meta-regression of duration of epilepsy against subcortical volume and cortical thickness, controlling for sex and intracranial volume.

| Structure               | Beta    | SE     | Z value | P value                | CI (lower) | CI (upper) | <i>r</i> <sup>2</sup> |
|-------------------------|---------|--------|---------|------------------------|------------|------------|-----------------------|
| <b>All epilepsies</b>   |         |        |         |                        |            |            |                       |
| Right putamen           | -13.014 | 1.178  | -11.044 | 2.34x10 <sup>-28</sup> | -15.323    | -10.704    | 0.000                 |
| Left caudate            | -7.062  | 0.853  | -8.275  | 1.29x10 <sup>-16</sup> | -8.734     | -5.389     | 0.000                 |
| Right caudate           | -7.168  | 0.885  | -8.104  | 5.33x10 <sup>-16</sup> | -8.902     | -5.435     | 0.000                 |
| Left thalamus*          | -13.580 | 1.725  | -7.871  | 3.52x10 <sup>-15</sup> | -16.961    | -10.198    | 9.655                 |
| Left pallidum           | -3.216  | 0.428  | -7.512  | 5.83x10 <sup>-14</sup> | -4.055     | -2.377     | 0.000                 |
| Right thalamus*         | -12.252 | 1.660  | -7.381  | 1.58x10 <sup>-13</sup> | -15.506    | -8.998     | 27.547                |
| Left putamen            | -11.414 | 1.586  | -7.196  | 6.21x10 <sup>-13</sup> | -14.523    | -8.305     | 23.077                |
| Left hippocampus*       | -8.320  | 1.162  | -7.159  | 8.16x10 <sup>-13</sup> | -10.598    | -6.042     | 1.755                 |
| Left accumbens          | -1.471  | 0.239  | -6.150  | 7.73x10 <sup>-10</sup> | -1.939     | -1.002     | 0.000                 |
| Right accumbens         | -1.277  | 0.209  | -6.094  | 1.10x10 <sup>-9</sup>  | -1.687     | -0.866     | 0.000                 |
| Right pallidum*         | -2.668  | 0.511  | -5.221  | 1.78x10 <sup>-7</sup>  | -3.669     | -1.666     | 39.771                |
| Left Lateral Ventricle  | 60.563  | 12.035 | 5.032   | 4.85x10 <sup>-7</sup>  | 36.974     | 84.151     | 46.456                |
| Right Lateral Ventricle | 58.496  | 12.034 | 4.861   | 1.17x10 <sup>-6</sup>  | 34.910     | 82.082     | 55.051                |
| R_precentral*           | -0.003  | 0.000  | -10.176 | 2.54x10 <sup>-24</sup> | -0.004     | -0.002     | 0.000                 |
| R_precuneus*            | -0.003  | 0.000  | -9.389  | 6.03x10 <sup>-21</sup> | -0.003     | -0.002     | 1.755                 |
| R_supramarginal*        | -0.003  | 0.000  | -8.985  | 2.58x10 <sup>-19</sup> | -0.004     | -0.002     | 4.848                 |
| R_caudalmiddlefrontal*  | -0.003  | 0.000  | -8.516  | 1.65x10 <sup>-17</sup> | -0.003     | -0.002     | 2.340                 |
| L_precuneus             | -0.002  | 0.000  | -8.320  | 8.80x10 <sup>-17</sup> | -0.003     | -0.002     | 0.601                 |
| L_parsopercularis       | -0.003  | 0.000  | -8.252  | 1.56x10 <sup>-16</sup> | -0.004     | -0.002     | 11.329                |
| L_caudalmiddlefrontal*  | -0.003  | 0.000  | -7.968  | 1.61x10 <sup>-15</sup> | -0.003     | -0.002     | 0.000                 |
| R_lingual               | -0.002  | 0.000  | -7.760  | 8.51x10 <sup>-15</sup> | -0.003     | -0.002     | 5.800                 |
| R_inferiorparietal      | -0.002  | 0.000  | -7.509  | 5.96x10 <sup>-14</sup> | -0.003     | -0.002     | 6.007                 |
| L_supramarginal*        | -0.003  | 0.000  | -7.365  | 1.77x10 <sup>-13</sup> | -0.003     | -0.002     | 14.422                |
| L_superiorparietal      | -0.002  | 0.000  | -7.210  | 5.58x10 <sup>-13</sup> | -0.002     | -0.001     | 0.000                 |
| R_parsopercularis*      | -0.003  | 0.000  | -7.210  | 5.59x10 <sup>-13</sup> | -0.003     | -0.002     | 12.838                |
| L_superiortemporal      | -0.003  | 0.000  | -7.135  | 9.71x10 <sup>-13</sup> | -0.004     | -0.002     | 16.273                |
| R_superiorparietal      | -0.002  | 0.000  | -7.055  | 1.72x10 <sup>-12</sup> | -0.002     | -0.001     | 2.916                 |
| L_superiorfrontal*      | -0.004  | 0.001  | -7.039  | 1.94x10 <sup>-12</sup> | -0.005     | -0.003     | 47.219                |
| L_pericalcarine         | -0.002  | 0.000  | -6.919  | 4.54x10 <sup>-12</sup> | -0.003     | -0.001     | 5.164                 |
| L_precentral*           | -0.003  | 0.000  | -6.884  | 5.84x10 <sup>-12</sup> | -0.004     | -0.002     | 40.608                |

|                        |        |       |        |                        |         |         |        |
|------------------------|--------|-------|--------|------------------------|---------|---------|--------|
| L_rostralmiddlefrontal | -0.002 | 0.000 | -6.705 | 2.02x10 <sup>-11</sup> | -0.003  | -0.002  | 15.822 |
| L_cuneus               | -0.002 | 0.000 | -6.674 | 2.49x10 <sup>-11</sup> | -0.003  | -0.001  | 0.139  |
| L_parstriangularis*    | -0.003 | 0.000 | -6.647 | 2.99x10 <sup>-11</sup> | -0.004  | -0.002  | 22.266 |
| R_superiorfrontal*     | -0.003 | 0.000 | -6.582 | 4.65x10 <sup>-11</sup> | -0.004  | -0.002  | 37.613 |
| R_superiortemporal     | -0.003 | 0.000 | -6.528 | 6.67x10 <sup>-11</sup> | -0.004  | -0.002  | 15.295 |
| L_transversetemporal*  | -0.004 | 0.001 | -6.460 | 1.05x10 <sup>-10</sup> | -0.005  | -0.002  | 18.067 |
| L_lingual              | -0.002 | 0.000 | -6.457 | 1.07x10 <sup>-10</sup> | -0.003  | -0.001  | 14.475 |
| R_middletemporal       | -0.003 | 0.000 | -6.382 | 1.75x10 <sup>-10</sup> | -0.004  | -0.002  | 23.260 |
| R_bankssts             | -0.003 | 0.000 | -6.246 | 4.21x10 <sup>-10</sup> | -0.004  | -0.002  | 15.316 |
| L_bankssts             | -0.002 | 0.000 | -6.244 | 4.27x10 <sup>-10</sup> | -0.003  | -0.002  | 4.710  |
| L_inferiorparietal     | -0.002 | 0.000 | -6.166 | 7.00x10 <sup>-10</sup> | -0.003  | -0.001  | 3.520  |
| R_transversetemporal*  | -0.003 | 0.000 | -6.140 | 8.24x10 <sup>-10</sup> | -0.004  | -0.002  | 0.000  |
| R_postcentral          | -0.002 | 0.000 | -6.122 | 9.24x10 <sup>-10</sup> | -0.002  | -0.001  | 3.391  |
| R_pericalcarine        | -0.002 | 0.000 | -6.095 | 1.09x10 <sup>-9</sup>  | -0.002  | -0.001  | 9.756  |
| R_cuneus*              | -0.002 | 0.000 | -6.094 | 1.10x10 <sup>-9</sup>  | -0.002  | -0.001  | 3.769  |
| R_parstriangularis*    | -0.002 | 0.000 | -5.874 | 4.24x10 <sup>-9</sup>  | -0.003  | -0.002  | 19.719 |
| L_posteriorcingulate   | -0.002 | 0.000 | -5.841 | 5.18x10 <sup>-9</sup>  | -0.003  | -0.001  | 3.374  |
| L_postcentral          | -0.002 | 0.000 | -5.572 | 2.52x10 <sup>-8</sup>  | -0.002  | -0.001  | 17.783 |
| L_parsorbitalis        | -0.003 | 0.001 | -5.514 | 3.50x10 <sup>-8</sup>  | -0.004  | -0.002  | 18.571 |
| L_middletemporal       | -0.002 | 0.000 | -5.447 | 5.13x10 <sup>-8</sup>  | -0.003  | -0.001  | 18.361 |
| R_lateraloccipital     | -0.002 | 0.000 | -5.433 | 5.54x10 <sup>-8</sup>  | -0.002  | -0.001  | 0.000  |
| R_posteriorcingulate   | -0.002 | 0.000 | -5.266 | 1.40x10 <sup>-7</sup>  | -0.002  | -0.001  | 0.000  |
| R_insula               | -0.002 | 0.000 | -4.840 | 1.30x10 <sup>-6</sup>  | -0.003  | -0.001  | 24.620 |
| L_lateraloccipital     | -0.001 | 0.000 | -4.810 | 1.51x10 <sup>-6</sup>  | -0.002  | -0.001  | 5.257  |
| R_isthmuscingulate     | -0.002 | 0.000 | -4.741 | 2.12x10 <sup>-6</sup>  | -0.003  | -0.001  | 0.000  |
| R_fusiform             | -0.002 | 0.000 | -4.668 | 3.04x10 <sup>-6</sup>  | -0.003  | -0.001  | 31.915 |
| R_rostralmiddlefrontal | -0.002 | 0.000 | -4.612 | 4.00x10 <sup>-6</sup>  | -0.003  | -0.001  | 49.726 |
| L_fusiform             | -0.002 | 0.000 | -4.595 | 4.34x10 <sup>-6</sup>  | -0.003  | -0.001  | 20.788 |
| L_paracentral*         | -0.002 | 0.001 | -4.556 | 5.22x10 <sup>-6</sup>  | -0.004  | -0.001  | 55.813 |
| R_lateralorbitofrontal | -0.002 | 0.001 | -4.551 | 5.34x10 <sup>-6</sup>  | -0.004  | -0.001  | 50.450 |
| R_paracentral*         | -0.002 | 0.001 | -4.540 | 5.63x10 <sup>-6</sup>  | -0.003  | -0.001  | 53.655 |
| L_isthmuscingulate     | -0.002 | 0.000 | -4.315 | 1.60x10 <sup>-5</sup>  | -0.003  | -0.001  | 16.341 |
| L_insula               | -0.002 | 0.000 | -4.238 | 2.26x10 <sup>-5</sup>  | -0.003  | -0.001  | 22.709 |
| R_inferiortemporal     | -0.002 | 0.000 | -3.966 | 7.30x10 <sup>-5</sup>  | -0.002  | -0.001  | 16.206 |
| <b>MTLE-R</b>          |        |       |        |                        |         |         |        |
| Right hippocampus      | -22.42 | 4.223 | -5.310 | 1.1x10 <sup>-7</sup>   | -30.700 | -14.146 | 43.664 |
| Right putamen          | -13.02 | 2.990 | -4.355 | 1.33x10 <sup>-5</sup>  | -18.882 | -7.160  | 0.000  |

|                             |         |        |        |                             |          |          |        |
|-----------------------------|---------|--------|--------|-----------------------------|----------|----------|--------|
| Right thalamus              | -18.11  | 4.228  | -4.284 | 1.84x10 <sup>-5</sup>       | -26.398  | -9.825   | 28.650 |
| L_transversetemporal        | -0.007  | 0.002  | -3.93  | 8.39x10 <sup>-5</sup>       | -0.010   | -0.003   | 39.64  |
| R_caudalmiddlefrontal       | -0.003  | 0.001  | -3.80  | 1.45x10 <sup>-4</sup>       | -0.005   | -0.002   | 1.088  |
| <b>IGE</b>                  |         |        |        |                             |          |          |        |
| Right putamen               | -15.452 | 3.200  | -4.829 | 1.37x10 <sup>-6</sup>       | -21.724  | -9.180   | 0.000  |
| Left pallidum               | -4.768  | 1.058  | -4.508 | 6.54x10 <sup>-6</sup>       | -6.841   | -2.695   | 0.000  |
| Left putamen                | -15.386 | 3.638  | -4.229 | 2.35x10 <sup>-5</sup>       | -22.516  | -8.255   | 0.000  |
| Right caudate               | -11.690 | 2.787  | -4.194 | 2.74x10 <sup>-5</sup>       | -17.153  | -6.227   | 29.313 |
| Right lateral ventricle     | 76.791  | 18.328 | 4.190  | 2.79x10 <sup>-5</sup>       | 40.868   | 112.714  | 0.000  |
| Left pars opercularis       | -0.005  | 0.001  | -3.842 | 1.22x10 <sup>-4</sup>       | -0.008   | -0.003   | 21.714 |
| <b>All other epilepsies</b> |         |        |        |                             |          |          |        |
| Left lateral ventricle*     | 59.6    | 13.599 | 4.38   | <b>1.17x10<sup>-5</sup></b> | 32.94    | 86.26    | 34.86  |
| R_precentral*               | -0.0036 | 0.0005 | -7.110 | <b>1.2X10<sup>-12</sup></b> | -0.00459 | -0.00261 | 0.00   |
| L_superiortemporal          | -0.0042 | 0.0006 | -6.588 | <b>4.5X10<sup>-11</sup></b> | -0.00542 | -0.00293 | 0.00   |
| L_supramarginal             | -0.0034 | 0.0006 | -6.158 | <b>7.4X10<sup>-10</sup></b> | -0.00449 | -0.00232 | 0.43   |
| L_superiorfrontal*          | -0.0034 | 0.0006 | -6.060 | <b>1.4x10<sup>-9</sup></b>  | -0.00450 | -0.00230 | 0.00   |
| L_bankssts                  | -0.0041 | 0.0007 | -5.976 | <b>2.3x10<sup>-9</sup></b>  | -0.00539 | -0.00273 | 7.47   |
| R_precuneus*                | -0.0029 | 0.0005 | -5.847 | <b>5.0x10<sup>-9</sup></b>  | -0.00393 | -0.00196 | 0.00   |
| L_cuneus                    | -0.0027 | 0.0005 | -5.528 | <b>3.2x10<sup>-8</sup></b>  | -0.00369 | -0.00176 | 0.00   |
| R_pericalcarine             | -0.0024 | 0.0004 | -5.487 | <b>4.1x10<sup>-8</sup></b>  | -0.00328 | -0.00155 | 0.00   |
| R_caudalmiddlefrontal*      | -0.0030 | 0.0006 | -5.394 | <b>6.9x10<sup>-8</sup></b>  | -0.00413 | -0.00193 | 0.00   |
| R_superiortemporal          | -0.0039 | 0.0007 | -5.370 | <b>7.9x10<sup>-8</sup></b>  | -0.00529 | -0.00246 | 13.04  |
| R_cuneus*                   | -0.0025 | 0.0005 | -5.355 | <b>8.6x10<sup>-8</sup></b>  | -0.00348 | -0.00161 | 0.00   |
| R_supramarginal*            | -0.0032 | 0.0006 | -5.178 | <b>2.2x10<sup>-7</sup></b>  | -0.00440 | -0.00198 | 13.50  |
| R_superiorfrontal*          | -0.0028 | 0.0006 | -5.113 | <b>3.2x10<sup>-7</sup></b>  | -0.00391 | -0.00174 | 0.00   |
| L_caudalmiddlefrontal*      | -0.0028 | 0.0005 | -5.101 | <b>3.4x10<sup>-7</sup></b>  | -0.00385 | -0.00171 | 0.00   |
| R_parstriangularis*         | -0.0032 | 0.0006 | -5.020 | <b>5.2x10<sup>-7</sup></b>  | -0.00446 | -0.00195 | 7.00   |
| R_parsorbitalis             | -0.0040 | 0.0008 | -4.781 | <b>1.7x10<sup>-6</sup></b>  | -0.00565 | -0.00236 | 6.64   |
| L_lingual                   | -0.0023 | 0.0005 | -4.712 | <b>2.5x10<sup>-6</sup></b>  | -0.00326 | -0.00134 | 3.09   |
| L_parsopercularis           | -0.0028 | 0.0006 | -4.617 | <b>3.9x10<sup>-6</sup></b>  | -0.00396 | -0.00160 | 6.50   |
| R_parsopercularis           | -0.0029 | 0.0006 | -4.539 | <b>5.7x10<sup>-6</sup></b>  | -0.00411 | -0.00163 | 5.75   |
| L_pericalcarine             | -0.0024 | 0.0005 | -4.535 | <b>5.8x10<sup>-6</sup></b>  | -0.00346 | -0.00137 | 23.05  |
| L_rostralmiddlefrontal      | -0.0023 | 0.0005 | -4.514 | <b>6.4x10<sup>-6</sup></b>  | -0.00333 | -0.00131 | 6.62   |
| R_inferiorparietal          | -0.0023 | 0.0005 | -4.476 | <b>7.6x10<sup>-6</sup></b>  | -0.00335 | -0.00131 | 6.40   |
| R_middletemporal            | -0.0033 | 0.0008 | -4.360 | <b>1.3x10<sup>-5</sup></b>  | -0.00480 | -0.00182 | 25.97  |

|                            |         |        |        |                            |          |          |       |
|----------------------------|---------|--------|--------|----------------------------|----------|----------|-------|
| L_parsorbitalis            | -0.0041 | 0.0009 | -4.326 | <b>1.5x10<sup>-5</sup></b> | -0.00591 | -0.00222 | 20.36 |
| R_insula                   | -0.0027 | 0.0006 | -4.244 | <b>2.2x10<sup>-5</sup></b> | -0.00390 | -0.00144 | 2.94  |
| L_rostralanteriorcingulate | -0.0034 | 0.0008 | -4.173 | <b>3.0x10<sup>-5</sup></b> | -0.00494 | -0.00178 | 5.64  |
| L_inferiorparietal         | -0.0026 | 0.0006 | -4.162 | <b>3.1x10<sup>-5</sup></b> | -0.00378 | -0.00136 | 22.34 |
| <b>L_precuneus*</b>        | -0.0027 | 0.0006 | -4.161 | <b>3.2x10<sup>-5</sup></b> | -0.00392 | -0.00141 | 25.74 |
| R_isthmuscingulate         | -0.0031 | 0.0008 | -4.008 | <b>6.1x10<sup>-5</sup></b> | -0.00454 | -0.00156 | 4.58  |
| R_medialorbitofrontal      | -0.0024 | 0.0006 | -3.994 | <b>6.5x10<sup>-5</sup></b> | -0.00356 | -0.00122 | 4.64  |
| R_postcentral              | -0.0021 | 0.0005 | -3.946 | <b>8.0x10<sup>-5</sup></b> | -0.00314 | -0.00106 | 18.44 |
| L_parstriangularis         | -0.0026 | 0.0007 | -3.936 | <b>8.3x10<sup>-5</sup></b> | -0.00386 | -0.00129 | 3.31  |
| R_bankssts                 | -0.0028 | 0.0007 | -3.852 | <b>1.2x10<sup>-4</sup></b> | -0.00421 | -0.00137 | 9.47  |
| R_lateralorbitofrontal     | -0.0029 | 0.0007 | -3.822 | <b>1.3x10<sup>-4</sup></b> | -0.00432 | -0.00139 | 30.56 |

**Abbreviations:** Beta, correlation beta; CI, confidence interval;  $I^2$ , heterogeneity index; MTLE-R, temporal lobe epilepsy with right mesial temporal sclerosis; IGE, idiopathic generalised epilepsy. Uncorrected p-values are reported. Correlations for subcortical regions that failed to survive Bonferroni correction ( $p < 1.49 \times 10^{-4}$  for subcortical regions;  $p < 1.49 \times 10^{-3}$  for cortical regions) are not reported (see Methods for statistical threshold determination). See Supplementary Table 3 for a list of cortical abbreviations. Regions **highlighted in yellow and marked with an asterisk (\*)** also showed evidence of subcortical volume loss / cortical thinning in the main case-control analysis.

**Supplementary Table 9.** Beta coefficients, standard errors and *P*-values for the meta-regression of age at onset of epilepsy against subcortical volume and cortical thickness, controlling for sex and intracranial volume.

| Structure                  | Beta    | SE     | Z value | P value                | CI (lower) | CI (upper) | <i>r</i> <sup>2</sup> |
|----------------------------|---------|--------|---------|------------------------|------------|------------|-----------------------|
| <b>All epilepsies</b>      |         |        |         |                        |            |            |                       |
| Right accumbens            | -1.84   | 0.27   | -6.68   | 2.32x10 <sup>-11</sup> | -2.38      | -1.30      | 23.36                 |
| Right putamen              | -9.13   | 1.61   | -5.66   | 1.48x10 <sup>-8</sup>  | -12.29     | -5.97      | 19.37                 |
| Left caudate               | -5.12   | 0.94   | -5.47   | 4.56x10 <sup>-8</sup>  | -6.96      | -3.29      | 0.00                  |
| Left accumbens             | -1.76   | 0.34   | -5.24   | 1.65x10 <sup>-7</sup>  | -2.42      | -1.10      | 29.05                 |
| Right caudate              | -4.91   | 0.99   | -4.96   | 7.08x10 <sup>-7</sup>  | -6.85      | -2.97      | 0.00                  |
| Left putamen               | -8.80   | 1.90   | -4.64   | 3.44x10 <sup>-6</sup>  | -12.51     | -5.08      | 23.74                 |
| L_rostralanteriorcingulate | -0.0044 | 0.0005 | -9.21   | 3.17x10 <sup>-20</sup> | -0.01      | 0.00       | 0.00                  |
| L_superiorfrontal*         | -0.0030 | 0.0004 | -7.91   | 2.66x10 <sup>-15</sup> | 0.00       | 0.00       | 7.30                  |
| R_medialorbitofrontal      | -0.0029 | 0.0004 | -7.81   | 5.86x10 <sup>-15</sup> | 0.00       | 0.00       | 0.00                  |
| R_parsopercularis*         | -0.0032 | 0.0004 | -7.52   | 5.40x10 <sup>-14</sup> | 0.00       | 0.00       | 20.48                 |
| L_parsopercularis          | -0.0027 | 0.0004 | -7.42   | 1.20x10 <sup>-13</sup> | 0.00       | 0.00       | 7.39                  |
| R_lateralorbitofrontal     | -0.0027 | 0.0004 | -6.44   | 1.16x10 <sup>-10</sup> | 0.00       | 0.00       | 14.65                 |
| L_frontalpole              | -0.0039 | 0.0006 | -6.28   | 3.35x10 <sup>-10</sup> | -0.01      | 0.00       | 0.00                  |
| R_rostralanteriorcingulate | -0.0038 | 0.0006 | -6.15   | 7.67x10 <sup>-10</sup> | -0.01      | 0.00       | 21.68                 |
| R_superiorfrontal*         | -0.0027 | 0.0004 | -6.11   | 9.77x10 <sup>-10</sup> | 0.00       | 0.00       | 28.65                 |
| L_medialorbitofrontal      | -0.0030 | 0.0005 | -6.10   | 1.06x10 <sup>-9</sup>  | 0.00       | 0.00       | 34.08                 |
| R_frontalpole              | -0.0038 | 0.0006 | -6.02   | 1.71x10 <sup>-9</sup>  | -0.01      | 0.00       | 0.00                  |
| L_parstriangularis*        | -0.0028 | 0.0005 | -5.94   | 2.78x10 <sup>-9</sup>  | 0.00       | 0.00       | 26.73                 |
| R_rostralmiddlefrontal     | -0.0021 | 0.0003 | -5.90   | 3.56x10 <sup>-9</sup>  | 0.00       | 0.00       | 19.15                 |
| L_transversetemporal*      | -0.0028 | 0.0005 | -5.73   | 1.03x10 <sup>-8</sup>  | 0.00       | 0.00       | 0.00                  |
| R_parsorbitalis            | -0.0028 | 0.0005 | -5.64   | 1.71x10 <sup>-8</sup>  | 0.00       | 0.00       | 0.00                  |
| L_insula                   | -0.0030 | 0.0006 | -5.37   | 8.09x10 <sup>-8</sup>  | 0.00       | 0.00       | 46.00                 |
| R_middletemporal           | -0.0021 | 0.0004 | -5.20   | 1.98x10 <sup>-7</sup>  | 0.00       | 0.00       | 9.96                  |
| R_lingual                  | -0.0015 | 0.0003 | -5.15   | 2.65x10 <sup>-7</sup>  | 0.00       | 0.00       | 0.00                  |

|                             |         |         |        |                        |         |         |        |
|-----------------------------|---------|---------|--------|------------------------|---------|---------|--------|
| L_caudalanteriorcingulate   | -0.0029 | 0.0006  | -5.08  | 3.78x10 <sup>-7</sup>  | 0.00    | 0.00    | 0.00   |
| R_parstriangularis*         | -0.0030 | 0.0006  | -4.98  | 6.51x10 <sup>-7</sup>  | 0.00    | 0.00    | 54.97  |
| L_lateralorbitofrontal      | -0.0027 | 0.0005  | -4.94  | 7.69x10 <sup>-7</sup>  | 0.00    | 0.00    | 42.80  |
| L_isthmuscingulate          | -0.0031 | 0.0006  | -4.88  | 1.08x10 <sup>-6</sup>  | 0.00    | 0.00    | 33.06  |
| L_lingual                   | -0.0016 | 0.0003  | -4.83  | 1.34x10 <sup>-6</sup>  | 0.00    | 0.00    | 9.12   |
| L_parsorbitalis             | -0.0030 | 0.0006  | -4.77  | 1.81x10 <sup>-6</sup>  | 0.00    | 0.00    | 26.43  |
| R_inferiortemporal          | -0.0021 | 0.0005  | -4.71  | 2.48x10 <sup>-6</sup>  | 0.00    | 0.00    | 22.02  |
| R_cuneus*                   | -0.0014 | 0.0003  | -4.57  | 4.90x10 <sup>-6</sup>  | 0.00    | 0.00    | 0.00   |
| R_inferiorparietal          | -0.0019 | 0.0004  | -4.56  | 5.19x10 <sup>-6</sup>  | 0.00    | 0.00    | 32.22  |
| L_postcentral               | -0.0015 | 0.0004  | -4.16  | 3.13x10 <sup>-5</sup>  | 0.00    | 0.00    | 24.06  |
| L_middletemporal            | -0.0023 | 0.0006  | -4.08  | 4.50x10 <sup>-5</sup>  | 0.00    | 0.00    | 44.78  |
| R_fusiform                  | -0.0018 | 0.0004  | -4.02  | 5.75x10 <sup>-5</sup>  | 0.00    | 0.00    | 30.22  |
| L_cuneus                    | -0.0012 | 0.0003  | -3.88  | 1.03x10 <sup>-4</sup>  | 0.00    | 0.00    | 0.00   |
| L_inferiorparietal          | -0.0023 | 0.0006  | -3.86  | 1.15x10 <sup>-4</sup>  | 0.00    | 0.00    | 61.76  |
| <b>MTLE-L</b>               |         |         |        |                        |         |         |        |
| L_insula                    | -0.0044 | 0.0010  | -4.19  | 2.77x10 <sup>-5</sup>  | -0.01   | 0.00    | 15.94  |
| L_pericalcarine             | -0.0034 | 0.0009  | -3.81  | 1.39x10 <sup>-4</sup>  | -0.01   | 0.00    | 20.67  |
| <b>MTLE-R</b>               |         |         |        |                        |         |         |        |
| L_medialorbitofrontal       | -0.0044 | 0.0009  | -5.16  | 4.47x10 <sup>-7</sup>  | -0.01   | 0.00    | 0.00   |
| <b>IGE</b>                  |         |         |        |                        |         |         |        |
| Right amygdala              | -6.12   | 1.61    | -3.81  | 1.37x10 <sup>-4</sup>  | -9.27   | -2.98   | 0.00   |
| L_rostralanteriorcingulate  | -0.01   | 0.00    | -3.87  | 1.09x10 <sup>-4</sup>  | -0.01   | 0.00    | 3.37   |
| <b>All other epilepsies</b> |         |         |        |                        |         |         |        |
| Right accumbens             | -2.212  | 0.414   | -5.341 | 9.24x10 <sup>-8</sup>  | -3.023  | -1.400  | 21.163 |
| Left accumbens              | -2.171  | 0.407   | -5.339 | 9.37x10 <sup>-8</sup>  | -2.968  | -1.374  | 4.901  |
| Right lateral ventricle*    | 57.730  | 11.021  | 5.238  | 1.62x10 <sup>-7</sup>  | 36.129  | 79.331  | 0.000  |
| Right putamen               | -9.899  | 2.190   | -4.520 | 6.18x10 <sup>-6</sup>  | -14.191 | -5.607  | 16.795 |
| L_medialorbitofrontal       | -0.0037 | 0.00050 | -7.478 | 7.54x10 <sup>-14</sup> | -0.0047 | -0.0028 | 0.00   |
| L_parsopercularis           | -0.0032 | 0.00049 | -6.536 | 6.31x10 <sup>-11</sup> | -0.0042 | -0.0023 | 0.00   |
| R_posteriorcingulate        | -0.0033 | 0.00050 | -6.505 | 7.76x10 <sup>-11</sup> | -0.0042 | -0.0023 | 0.00   |



|                            |         |         |        |                       |         |         |       |
|----------------------------|---------|---------|--------|-----------------------|---------|---------|-------|
| L_superiorfrontal*         | -0.0028 | 0.00052 | -5.529 | 3.21x10 <sup>-8</sup> | -0.0039 | -0.0018 | 3.11  |
| L_insula                   | -0.0029 | 0.00054 | -5.404 | 6.51x10 <sup>-8</sup> | -0.0039 | -0.0018 | 6.54  |
| L_isthmuscingulate         | -0.0035 | 0.00065 | -5.363 | 8.17x10 <sup>-8</sup> | -0.0048 | -0.0022 | 0.68  |
| L_posteriorcingulate       | -0.0033 | 0.00061 | -5.361 | 8.28x10 <sup>-8</sup> | -0.0045 | -0.0021 | 16.11 |
| R_isthmuscingulate         | -0.0034 | 0.00064 | -5.264 | 1.41x10 <sup>-7</sup> | -0.0047 | -0.0021 | 0.00  |
| L_middletemporal           | -0.0029 | 0.00058 | -4.971 | 6.65x10 <sup>-7</sup> | -0.0040 | -0.0017 | 4.86  |
| R_rostralanteriorcingulate | -0.0032 | 0.00067 | -4.794 | 1.63x10 <sup>-6</sup> | -0.0045 | -0.0019 | 0.00  |
| L_lateralorbitofrontal     | -0.0030 | 0.00062 | -4.781 | 1.75x10 <sup>-6</sup> | -0.0042 | -0.0018 | 20.48 |
| R_supramarginal*           | -0.0023 | 0.00048 | -4.718 | 2.38x10 <sup>-6</sup> | -0.0032 | -0.0013 | 0.00  |
| L_precuneus*               | -0.0021 | 0.00046 | -4.454 | 8.42x10 <sup>-6</sup> | -0.0030 | -0.0012 | 0.00  |
| L_supramarginal            | -0.0022 | 0.00049 | -4.452 | 8.51x10 <sup>-6</sup> | -0.0032 | -0.0012 | 0.00  |
| R_inferiorparietal         | -0.0019 | 0.00044 | -4.307 | 1.65x10 <sup>-5</sup> | -0.0027 | -0.0010 | 0.00  |
| R_parstriangularis*        | -0.0028 | 0.00065 | -4.212 | 2.53x10 <sup>-5</sup> | -0.0040 | -0.0015 | 19.51 |
| L_inferiorparietal         | -0.0019 | 0.00046 | -4.188 | 2.82x10 <sup>-5</sup> | -0.0028 | -0.0010 | 0.00  |
| R_bankssts                 | -0.0028 | 0.00068 | -4.136 | 3.53x10 <sup>-5</sup> | -0.0041 | -0.0015 | 9.70  |
| L_frontalpole              | -0.0037 | 0.00092 | -4.054 | 5.03x10 <sup>-5</sup> | -0.0056 | -0.0019 | 1.19  |
| L_parstriangularis         | -0.0029 | 0.00073 | -4.013 | 6.00x10 <sup>-5</sup> | -0.0044 | -0.0015 | 24.61 |
| L_rostralmiddlefrontal     | -0.0025 | 0.00062 | -3.976 | 7.02x10 <sup>-5</sup> | -0.0037 | -0.0013 | 38.06 |
| R_precuneus*               | -0.0018 | 0.00047 | -3.969 | 7.23x10 <sup>-5</sup> | -0.0028 | -0.0009 | 0.00  |
| L_rostralanteriorcingulate | -0.0033 | 0.00084 | -3.956 | 7.62x10 <sup>-5</sup> | -0.0049 | -0.0017 | 17.94 |
| R_superiorfrontal*         | -0.0025 | 0.00065 | -3.850 | 1.18x10 <sup>-4</sup> | -0.0038 | -0.0012 | 28.07 |

**Abbreviations:** Beta, correlation beta; CI, confidence interval;  $I^2$ , heterogeneity index; MTLE-R, temporal lobe epilepsy with right mesial temporal sclerosis; IGE, idiopathic generalised epilepsy. See Supplementary Table 3 for a list of cortical abbreviations. Uncorrected p-values are reported. Correlations for subcortical volumes that failed to survive Bonferroni correction ( $p < 1.49 \times 10^{-4}$ ) or cortical thicknesses that failed to survive Bonferroni correction ( $p < 1.49 \times 10^{-4}$ ) are not reported (see Methods for statistical threshold determination). Regions highlighted in yellow and marked with an asterisk (\*) also showed evidence of subcortical volume loss / cortical thinning in the main case-control analysis.

**Supplementary Table 10.** Effect sizes for subcortical volume differences (Cohen's *d*) between healthy controls and the 'all-epilepsies' phenotype; 3T field strength only.

| Structure                      | Cohen's <i>d</i><br>(3T only) | Cohen's <i>d</i><br>(full sample) | SE          | Z score     | 95% CI               | <i>P</i> value<br>(3T only)  | <i>P</i> value<br>(full sample) | <i>I</i> <sup>2</sup> | Number of<br>controls | Number<br>of cases |
|--------------------------------|-------------------------------|-----------------------------------|-------------|-------------|----------------------|------------------------------|---------------------------------|-----------------------|-----------------------|--------------------|
| <b>Thalamus (RH)</b>           | <b>-0.36</b>                  | <b>-0.37</b>                      | <b>0.05</b> | <b>0.05</b> | <b>-0.46 - -0.26</b> | <b>3.85x10<sup>-12</sup></b> | <b>7.67x10<sup>-14</sup></b>    | <b>46.86</b>          | <b>1650</b>           | <b>2070</b>        |
| <b>Thalamus (LH)</b>           | <b>-0.34</b>                  | <b>-0.36</b>                      | <b>0.07</b> | <b>0.07</b> | <b>-0.49 - -0.2</b>  | <b>3.05x10<sup>-6</sup></b>  | <b>1.31x10<sup>-6</sup></b>     | <b>74.13</b>          | <b>1621</b>           | <b>2037</b>        |
| <b>Hippocampus (LH)</b>        | <b>-0.34</b>                  | <b>-0.35</b>                      | <b>0.07</b> | <b>0.07</b> | <b>-0.48 - -0.2</b>  | <b>1.01x10<sup>-6</sup></b>  | <b>3.04x10<sup>-7</sup></b>     | <b>70.84</b>          | <b>1641</b>           | <b>2058</b>        |
| <b>Hippocampus (RH)</b>        | <b>-0.32</b>                  | <b>-0.34</b>                      | <b>0.05</b> | <b>0.05</b> | <b>-0.42 - -0.22</b> | <b>7.37x10<sup>-10</sup></b> | <b>6.63x10<sup>-10</sup></b>    | <b>48.33</b>          | <b>1653</b>           | <b>2062</b>        |
| <b>Pallidum (RH)</b>           | <b>-0.31</b>                  | <b>-0.32</b>                      | <b>0.06</b> | <b>0.06</b> | <b>-0.42 - -0.2</b>  | <b>5.60x10<sup>-8</sup></b>  | <b>8.32x10<sup>-9</sup></b>     | <b>57.36</b>          | <b>1644</b>           | <b>2045</b>        |
| <b>Putamen (LH)</b>            | <b>-0.25</b>                  | <b>-0.25</b>                      | <b>0.07</b> | <b>0.07</b> | <b>-0.37 - -0.12</b> | <b>1.71x10<sup>-4</sup></b>  | <b>8.30x10<sup>-5</sup></b>     | <b>66.34</b>          | <b>1570</b>           | <b>2008</b>        |
| Putamen (RH)                   | -0.23                         | -0.24                             | 0.08        | 0.08        | -0.39 - -0.08        | 3.03x10 <sup>-3</sup>        | 1.53x10 <sup>-3</sup>           | 77.86                 | 1624                  | 2060               |
| Pallidum (LH)                  | -0.18                         | -0.17                             | 0.08        | 0.08        | -0.35 - -0.02        | 3.13x10 <sup>-2</sup>        | 3.53x10 <sup>-2</sup>           | 80.21                 | 1543                  | 1924               |
| Caudate (LH)                   | -0.12                         | -0.12                             | 0.05        | 0.05        | -0.22 - -0.02        | 2.17x10 <sup>-2</sup>        | 1.56x10 <sup>-2</sup>           | 49.84                 | 1658                  | 2068               |
| Accumbens (RH)                 | -0.08                         | -0.06                             | 0.10        | 0.10        | -0.26 - 0.11         | 4.35x10 <sup>-1</sup>        | 4.94x10 <sup>-1</sup>           | 85.36                 | 1636                  | 2070               |
| Caudate (RH)                   | -0.07                         | -0.08                             | 0.06        | 0.06        | -0.18 - 0.04         | 2.29x10 <sup>-1</sup>        | 1.36x10 <sup>-1</sup>           | 56.84                 | 1659                  | 2070               |
| Accumbens (LH)                 | -0.02                         | -0.02                             | 0.08        | 0.08        | -0.17 - 0.13         | 7.71x10 <sup>-1</sup>        | 8.33x10 <sup>-1</sup>           | 76.81                 | 1641                  | 2069               |
| Amygdala (LH)                  | 0.10                          | 0.10                              | 0.07        | 0.07        | -0.04 - 0.25         | 1.73x10 <sup>-1</sup>        | 1.47x10 <sup>-1</sup>           | 74.91                 | 1651                  | 2057               |
| Amygdala (RH)                  | 0.12                          | 0.11                              | 0.06        | 0.06        | -0.01 - 0.24         | 6.94x10 <sup>-2</sup>        | 6.76x10 <sup>-2</sup>           | 65.27                 | 1627                  | 2041               |
| <b>Right lateral ventricle</b> | <b>0.26</b>                   | <b>0.27</b>                       | <b>0.03</b> | <b>0.03</b> | <b>0.19 - 0.33</b>   | <b>9.25x10<sup>-14</sup></b> | <b>3.73x10<sup>-15</sup></b>    | <b>0.00</b>           | <b>1656</b>           | <b>2071</b>        |
| <b>Left lateral ventricle</b>  | <b>0.28</b>                   | <b>0.29</b>                       | <b>0.04</b> | <b>6.62</b> | <b>0.2 - 0.36</b>    | <b>3.61x10<sup>-11</sup></b> | <b>2.14x10<sup>-12</sup></b>    | <b>24.31</b>          | <b>1656</b>           | <b>2069</b>        |

**Abbreviations:** Beta, correlation beta; CI, confidence interval; *I*<sup>2</sup>, heterogeneity index. All *p*-values are reported, uncorrected. For ease of comparison, Cohen's *d* estimates and *p*-values extracted using 3T data only are provided alongside Cohen's *d* estimates and *p*-values extracted from the full sample, combining 1.5T and 3T datasets. *P*-values that passed the Bonferroni-adjusted alpha level ( $p < 1.49 \times 10^{-4}$ ) are highlighted in bold red (see Methods for statistical threshold determination). Brain regions reported as significant in the full sample, but not in the 3T sample, are highlighted in yellow.

**Supplementary Table 11.** Effect sizes for subcortical volume differences (Cohen's *d*) between healthy controls and the 'MTLE-L' phenotype; 3T field strength only.

| Structure               | Cohen's <i>d</i><br>(3T only) | Cohen's <i>d</i><br>(full sample) | SE          | Z score      | 95% CI               | <i>P</i> value<br>(3T only)  | <i>P</i> value<br>(full sample) | <i>I</i> <sup>2</sup> | Number of<br>controls | Number of<br>cases |
|-------------------------|-------------------------------|-----------------------------------|-------------|--------------|----------------------|------------------------------|---------------------------------|-----------------------|-----------------------|--------------------|
| Hippocampus (LH)        | <b>-1.75</b>                  | <b>-1.73</b>                      | <b>0.21</b> | <b>-8.49</b> | <b>-2.15 - -1.34</b> | <b>2.10x10<sup>-17</sup></b> | <b>1.35x10<sup>-19</sup></b>    | <b>86.41</b>          | <b>1346</b>           | <b>382</b>         |
| Thalamus (LH)           | <b>-0.82</b>                  | <b>-0.84</b>                      | <b>0.13</b> | <b>-6.14</b> | <b>-1.09 - -0.56</b> | <b>8.07x10<sup>-10</sup></b> | <b>2.19x10<sup>-11</sup></b>    | <b>71.57</b>          | <b>1318</b>           | <b>380</b>         |
| Pallidum (RH)           | <b>-0.48</b>                  | <b>-0.45</b>                      | <b>0.09</b> | <b>-5.12</b> | <b>-0.66 - -0.3</b>  | <b>3.07x10<sup>-7</sup></b>  | <b>5.48x10<sup>-7</sup></b>     | <b>42.81</b>          | <b>1340</b>           | <b>386</b>         |
| Thalamus (RH)           | <b>-0.45</b>                  | <b>-0.46</b>                      | <b>0.12</b> | <b>-3.67</b> | <b>-0.68 - -0.21</b> | <b>2.40x10<sup>-4</sup></b>  | <b>8.12x10<sup>-5</sup></b>     | <b>66.86</b>          | <b>1346</b>           | <b>386</b>         |
| Putamen (LH)            | <b>-0.40</b>                  | <b>-0.39</b>                      | <b>0.09</b> | <b>-4.56</b> | <b>-0.58 - -0.23</b> | <b>5.12x10<sup>-6</sup></b>  | <b>1.07x10<sup>-6</sup></b>     | <b>36.26</b>          | <b>1286</b>           | <b>382</b>         |
| Pallidum (LH)           | -0.31                         | -0.27                             | 0.15        | -2.05        | -0.61 - -0.01        | 4.02x10 <sup>-2</sup>        | 7.25x10 <sup>-2</sup>           | 79.26                 | 1266                  | 370                |
| Putamen (RH)            | -0.30                         | -0.28                             | 0.12        | -2.43        | -0.53 - -0.06        | 1.50x10 <sup>-2</sup>        | 1.13x10 <sup>-2</sup>           | 66.63                 | 1320                  | 384                |
| Amygdala (LH)           | -0.23                         | -0.22                             | 0.11        | -2.14        | -0.43 - -0.02        | 3.25x10 <sup>-2</sup>        | 2.03x10 <sup>-2</sup>           | 55.48                 | 1347                  | 384                |
| Caudate (LH)            | -0.21                         | -0.18                             | 0.13        | -1.69        | -0.46 - 0.03         | 9.10x10 <sup>-2</sup>        | 1.22x10 <sup>-1</sup>           | 69.11                 | 1352                  | 386                |
| Hippocampus (RH)        | -0.19                         | -0.20                             | 0.15        | -1.26        | -0.48 - 0.1          | 2.06x10 <sup>-1</sup>        | 1.59x10 <sup>-1</sup>           | 79.00                 | 1351                  | 386                |
| Accumbens (RH)          | -0.15                         | -0.12                             | 0.17        | -0.93        | -0.48 - 0.17         | 3.53x10 <sup>-1</sup>        | 4.47x10 <sup>-1</sup>           | 82.65                 | 1330                  | 385                |
| Accumbens (LH)          | -0.12                         | -0.10                             | 0.12        | -1.02        | -0.35 - 0.11         | 3.10x10 <sup>-1</sup>        | 4.36x10 <sup>-1</sup>           | 63.58                 | 1336                  | 385                |
| Caudate (RH)            | -0.08                         | -0.06                             | 0.13        | -0.60        | -0.32 - 0.17         | 5.47x10 <sup>-1</sup>        | 5.87x10 <sup>-1</sup>           | 69.80                 | 1353                  | 385                |
| Amygdala (RH)           | 0.27                          | 0.27                              | 0.10        | 2.66         | 0.07 - 0.47          | 7.88x10 <sup>-3</sup>        | 3.42x10 <sup>-3</sup>           | 51.70                 | 1321                  | 370                |
| Right lateral ventricle | <b>0.34</b>                   | <b>0.36</b>                       | <b>0.10</b> | <b>3.47</b>  | <b>0.15 - 0.53</b>   | <b>5.23x10<sup>-4</sup></b>  | <b>8.95x10<sup>-5</sup></b>     | <b>48.61</b>          | <b>1352</b>           | <b>386</b>         |
| Left lateral ventricle  | <b>0.45</b>                   | <b>0.47</b>                       | <b>0.10</b> | <b>4.61</b>  | <b>0.26 - 0.64</b>   | <b>4.00x10<sup>-6</sup></b>  | <b>1.96x10<sup>-7</sup></b>     | <b>48.10</b>          | <b>1351</b>           | <b>386</b>         |

**Abbreviations:** Beta, correlation beta; CI, confidence interval; *I*<sup>2</sup>, heterogeneity index. All *p*-values are reported, uncorrected. For ease of comparison, Cohen's *d* estimates and *p*-values extracted using 3T data only are provided alongside Cohen's *d* estimates and *p*-values extracted from the full sample, combining 1.5T and 3T datasets. *P*-values that passed the Bonferroni-adjusted alpha level ( $p < 1.49 \times 10^{-4}$ ) are highlighted in bold red (see Methods for statistical threshold determination). Brain regions reported as significant in the full sample, but not in the 3T sample, are highlighted in yellow.

**Supplementary Table 12.** Effect sizes for subcortical volume differences (Cohen's *d*) between healthy controls and the 'MTLE-R' phenotype; 3T field strength only.

| Structure                      | Cohen's <i>d</i><br>(3T only) | Cohen's <i>d</i><br>(full sample) | SE          | Z score       | 95% CI               | <i>P</i> value<br>(3T only) | <i>P</i> value<br>(full sample) | <i>I</i> <sup>2</sup> | Number of<br>controls | Number<br>of cases |
|--------------------------------|-------------------------------|-----------------------------------|-------------|---------------|----------------------|-----------------------------|---------------------------------|-----------------------|-----------------------|--------------------|
| <b>Hippocampus (RH)</b>        | <b>-1.90</b>                  | <b>-1.91</b>                      | <b>0.16</b> | <b>-11.76</b> | <b>-2.22 - -1.58</b> | <b>6.10x10-32</b>           | <b>6.36x10-37</b>               | <b>74.50</b>          | <b>1239</b>           | <b>312</b>         |
| <b>Thalamus (RH)</b>           | <b>-0.73</b>                  | <b>-0.73</b>                      | <b>0.12</b> | <b>-6.34</b>  | <b>-0.96 - -0.51</b> | <b>2.28x10-10</b>           | <b>1.60x10-12</b>               | <b>58.38</b>          | <b>1238</b>           | <b>311</b>         |
| <b>Pallidum (RH)</b>           | <b>-0.48</b>                  | <b>-0.45</b>                      | <b>0.09</b> | <b>-5.40</b>  | <b>-0.66 - -0.31</b> | <b>6.71x10-8</b>            | <b>3.96x10-7</b>                | <b>31.94</b>          | <b>1231</b>           | <b>308</b>         |
| Putamen (RH)                   | -0.48                         | -0.47                             | 0.15        | -3.28         | -0.77 - -0.19        | 1.05x10-3                   | 4.94x10-4                       | 75.19                 | 1211                  | 313                |
| Thalamus (LH)                  | -0.46                         | -0.47                             | 0.23        | -2.00         | -0.9 - -0.01         | 4.57x10-2                   | 2.41x10-2                       | 89.88                 | 1208                  | 292                |
| Pallidum (LH)                  | -0.33                         | -0.30                             | 0.13        | -2.63         | -0.58 - -0.09        | 8.48x10-3                   | 1.43x10-2                       | 65.47                 | 1130                  | 295                |
| Putamen (LH)                   | -0.32                         | -0.30                             | 0.14        | -2.29         | -0.59 - -0.05        | 2.20x10-2                   | 1.72x10-2                       | 72.53                 | 1157                  | 306                |
| Caudate (LH)                   | -0.20                         | -0.20                             | 0.10        | -1.96         | -0.39 - 0            | 5.05x10-2                   | 3.14x10-2                       | 47.20                 | 1244                  | 313                |
| Hippocampus (LH)               | -0.17                         | -0.17                             | 0.10        | -1.71         | -0.36 - 0.02         | 8.80x10-2                   | 5.57x10-2                       | 43.74                 | 1230                  | 313                |
| Caudate (RH)                   | -0.17                         | -0.19                             | 0.11        | -1.57         | -0.37 - 0.04         | 1.16x10-1                   | 5.74x10-2                       | 51.82                 | 1245                  | 313                |
| Accumbens (RH)                 | -0.05                         | -0.03                             | 0.14        | -0.33         | -0.33 - 0.23         | 7.41x10-1                   | 8.45x10-1                       | 74.25                 | 1222                  | 312                |
| Accumbens (LH)                 | 0.04                          | 0.05                              | 0.10        | 0.41          | -0.15 - 0.23         | 6.83x10-1                   | 5.58x10-1                       | 45.48                 | 1228                  | 312                |
| Amygdala (RH)                  | 0.05                          | 0.03                              | 0.13        | 0.42          | -0.2 - 0.3           | 6.77x10-1                   | 8.25x10-1                       | 67.36                 | 1213                  | 307                |
| Amygdala (LH)                  | 0.24                          | 0.23                              | 0.09        | 2.67          | 0.06 - 0.41          | 7.63x10-3                   | 4.24x10-3                       | 32.22                 | 1239                  | 310                |
| <b>Left lateral ventricle</b>  | <b>0.37</b>                   | <b>0.39</b>                       | <b>0.09</b> | <b>4.16</b>   | <b>0.2 - 0.54</b>    | <b>3.14x10-5</b>            | <b>1.52x10-6</b>                | <b>32.99</b>          | <b>1244</b>           | <b>314</b>         |
| <b>Right lateral ventricle</b> | <b>0.43</b>                   | <b>0.44</b>                       | <b>0.07</b> | <b>6.47</b>   | <b>0.3 - 0.56</b>    | <b>9.58x10-11</b>           | <b>6.57x10-12</b>               | <b>0.01</b>           | <b>1245</b>           | <b>314</b>         |

**Abbreviations:** Beta, correlation beta; CI, confidence interval; *I*<sup>2</sup>, heterogeneity index. All *p*-values are reported, uncorrected. For ease of comparison, Cohen's *d* estimates and *p*-values extracted using 3T data only are provided alongside Cohen's *d* estimates and *p*-values extracted from the full sample, combining 1.5T and 3T datasets. *P*-values that passed the Bonferroni-adjusted alpha level ( $p < 1.49 \times 10^{-4}$ ) are highlighted in bold red (see Methods for statistical threshold determination). Brain regions reported as significant in the full sample, but not in the 3T sample, are highlighted in yellow.

**Supplementary Table 13.** Effect sizes for subcortical volume differences (Cohen's *d*) between healthy controls and the 'IGE' phenotype; 3T field strength only.

| Structure               | Cohen's <i>d</i><br>(3T only) | Cohen's <i>d</i><br>(full sample) | SE          | Z score      | 95% CI               | <i>P</i> value<br>(3T only) | <i>P</i> value<br>(full sample) | <i>I</i> <sup>2</sup> | Number of<br>controls | Number<br>of cases |
|-------------------------|-------------------------------|-----------------------------------|-------------|--------------|----------------------|-----------------------------|---------------------------------|-----------------------|-----------------------|--------------------|
| Thalamus (LH)           | -0.39                         | -0.40                             | 0.14        | -2.88        | -0.66 - -0.13        | 3.97x10 <sup>-3</sup>       | 2.99x10 <sup>-3</sup>           | 74.72                 | 1162                  | 359                |
| <b>Thalamus (RH)</b>    | <b>-0.39</b>                  | <b>-0.40</b>                      | <b>0.09</b> | <b>-4.29</b> | <b>-0.57 - -0.21</b> | <b>1.76x10<sup>-5</sup></b> | <b>3.60x10<sup>-6</sup></b>     | <b>44.13</b>          | <b>1191</b>           | <b>362</b>         |
| <b>Pallidum (RH)</b>    | <b>-0.37</b>                  | <b>-0.35</b>                      | <b>0.10</b> | <b>-3.85</b> | <b>-0.56 - -0.18</b> | <b>1.16x10<sup>-4</sup></b> | <b>3.37x10<sup>-4</sup></b>     | <b>49.58</b>          | <b>1185</b>           | <b>362</b>         |
| Hippocampus (LH)        | -0.32                         | -0.32                             | 0.14        | -2.35        | -0.59 - -0.05        | 1.88x10 <sup>-2</sup>       | 1.90x10 <sup>-2</sup>           | 74.77                 | 1185                  | 362                |
| Putamen (LH)            | -0.29                         | -0.28                             | 0.09        | -3.32        | -0.47 - -0.12        | 9.08x10 <sup>-4</sup>       | 1.32x10 <sup>-3</sup>           | 39.68                 | 1111                  | 352                |
| Putamen (RH)            | -0.26                         | -0.23                             | 0.10        | -2.50        | -0.46 - -0.06        | 1.23x10 <sup>-2</sup>       | 3.93x10 <sup>-2</sup>           | 55.10                 | 1167                  | 357                |
| Caudate (LH)            | -0.25                         | -0.25                             | 0.08        | -3.28        | -0.4 - -0.1          | 1.02x10 <sup>-3</sup>       | 1.09x10 <sup>-3</sup>           | 24.56                 | 1199                  | 361                |
| Hippocampus (RH)        | -0.24                         | -0.25                             | 0.14        | -1.75        | -0.51 - 0.03         | 7.94x10 <sup>-2</sup>       | 6.35x10 <sup>-2</sup>           | 75.36                 | 1195                  | 360                |
| Caudate (RH)            | -0.20                         | -0.20                             | 0.08        | -2.42        | -0.36 - -0.04        | 1.55x10 <sup>-2</sup>       | 1.53x10 <sup>-2</sup>           | 33.65                 | 1200                  | 362                |
| Pallidum (LH)           | -0.19                         | -0.16                             | 0.18        | -1.07        | -0.53 - 0.16         | 2.85x10 <sup>-1</sup>       | 3.85x10 <sup>-1</sup>           | 84.47                 | 1084                  | 343                |
| Accumbens (RH)          | -0.16                         | -0.15                             | 0.09        | -1.77        | -0.34 - 0.02         | 7.74x10 <sup>-2</sup>       | 8.81x10 <sup>-2</sup>           | 43.65                 | 1180                  | 363                |
| Accumbens (LH)          | -0.14                         | -0.13                             | 0.10        | -1.37        | -0.33 - 0.06         | 1.72x10 <sup>-1</sup>       | 1.78x10 <sup>-1</sup>           | 53.61                 | 1185                  | 363                |
| Amygdala (RH)           | -0.14                         | -0.12                             | 0.09        | -1.53        | -0.31 - 0.04         | 1.25x10 <sup>-1</sup>       | 1.78x10 <sup>-1</sup>           | 41.36                 | 1168                  | 362                |
| Amygdala (LH)           | -0.05                         | -0.05                             | 0.13        | -0.36        | -0.31 - 0.22         | 7.17x10 <sup>-1</sup>       | 7.10x10 <sup>-1</sup>           | 73.86                 | 1195                  | 352                |
| Left lateral ventricle  | 0.23                          | 0.24                              | 0.09        | 2.62         | 0.06 - 0.4           | 8.87x10 <sup>-3</sup>       | 5.20x10 <sup>-3</sup>           | 40.50                 | 1197                  | 359                |
| Right lateral ventricle | 0.26                          | 0.27                              | 0.09        | 3.04         | 0.09 - 0.43          | 2.36x10 <sup>-3</sup>       | 9.23x10 <sup>-4</sup>           | 36.71                 | 1197                  | 361                |

**Abbreviations:** Beta, correlation beta; CI, confidence interval; *I*<sup>2</sup>, heterogeneity index. All *p*-values are reported, uncorrected. For ease of comparison, Cohen's *d* estimates and *p*-values extracted using 3T data only are provided alongside Cohen's *d* estimates and *p*-values extracted from the full sample, combining 1.5T and 3T datasets. *P*-values that passed the Bonferroni-adjusted alpha level ( $p < 1.49 \times 10^{-4}$ ) are highlighted in bold red (see Methods for statistical threshold determination). Brain regions reported as significant in the 3T sample, but not in the full sample, are highlighted in green.

**Supplementary Table 14.** Effect sizes for subcortical volume differences (Cohen's *d*) between healthy controls and the 'all-other-epilepsies' phenotype; 3T field strength only.

| Structure               | Cohen's <i>d</i><br>(3T only) | Cohen's <i>d</i><br>(full sample) | SE           | Z score      | 95% CI               | <i>P</i> value<br>(3T only)  | <i>P</i> value<br>(full sample) | <i>I</i> <sup>2</sup> | Number of<br>controls | Number<br>of cases |
|-------------------------|-------------------------------|-----------------------------------|--------------|--------------|----------------------|------------------------------|---------------------------------|-----------------------|-----------------------|--------------------|
| Thalamus (RH)           | -0.299                        | -0.305                            | 0.047        | -6.334       | -0.392 - -0.207      | <b>2.39x10<sup>-10</sup></b> | <b>7.92x10<sup>-11</sup></b>    | 4.565                 | 1427                  | 986                |
| Pallidum (RH)           | -0.225                        | -0.235                            | 0.058        | -3.886       | -0.338 - -0.111      | <b>1.02x10<sup>-4</sup></b>  | <b>8.07x10<sup>-5</sup></b>     | 31.140                | 1421                  | 964                |
| Pallidum (LH)           | -0.209                        | -0.208                            | 0.091        | -2.297       | -0.388 - -0.031      | 2.16x10 <sup>-2</sup>        | 2.13x10 <sup>-2</sup>           | 70.101                | 1320                  | 891                |
| Thalamus (LH)           | -0.204                        | -0.197                            | 0.081        | -2.533       | -0.363 - -0.046      | 1.13x10 <sup>-2</sup>        | 1.32x10 <sup>-2</sup>           | 63.636                | 1398                  | 981                |
| Putamen (LH)            | -0.184                        | -0.193                            | 0.080        | -2.293       | -0.342 - -0.027      | 2.18x10 <sup>-2</sup>        | 1.82x10 <sup>-2</sup>           | 62.129                | 1347                  | 943                |
| Putamen (RH)            | -0.163                        | -0.166                            | 0.083        | -1.964       | -0.326 - 0           | 4.96x10 <sup>-2</sup>        | 4.57x10 <sup>-2</sup>           | 65.867                | 1401                  | 981                |
| Caudate (LH)            | -0.063                        | -0.070                            | 0.059        | -1.053       | -0.179 - 0.054       | 2.93x10 <sup>-1</sup>        | 2.34x10 <sup>-1</sup>           | 35.153                | 1434                  | 983                |
| Hippocampus (RH)        | -0.052                        | -0.041                            | 0.048        | -1.069       | -0.147 - 0.043       | 2.85x10 <sup>-1</sup>        | 3.82x10 <sup>-1</sup>           | 8.116                 | 1429                  | 979                |
| Hippocampus (LH)        | -0.024                        | -0.021                            | 0.058        | -0.413       | -0.137 - 0.09        | 6.80x10 <sup>-1</sup>        | 7.08x10 <sup>-1</sup>           | 31.517                | 1420                  | 976                |
| Caudate (RH)            | 0.003                         | -0.009                            | 0.062        | 0.056        | -0.119 - 0.125       | 9.55x10 <sup>-1</sup>        | 8.81x10 <sup>-1</sup>           | 40.460                | 1435                  | 985                |
| Accumbens (LH)          | 0.010                         | -0.011                            | 0.092        | 0.107        | -0.17 - 0.189        | 9.14x10 <sup>-1</sup>        | 9.12x10 <sup>-1</sup>           | 71.895                | 1418                  | 984                |
| Accumbens (RH)          | 0.024                         | 0.016                             | 0.091        | 0.263        | -0.154 - 0.202       | 7.92x10 <sup>-1</sup>        | 8.64x10 <sup>-1</sup>           | 71.420                | 1412                  | 985                |
| Left lateral ventricle  | 0.196                         | 0.198                             | 0.046        | 4.258        | 0.106 - 0.286        | <b>2.06x10<sup>-5</sup></b>  | <b>1.23x10<sup>-5</sup></b>     | 0.983                 | 1433                  | 985                |
| Right lateral ventricle | 0.209                         | 0.212                             | 0.047        | 4.483        | 0.118 - 0.3          | <b>7.35x10<sup>-6</sup></b>  | <b>4.62x10<sup>-6</sup></b>     | 2.965                 | 1434                  | 985                |
| Amygdala (RH)           | <b>0.212</b>                  | <b>0.218</b>                      | <b>0.061</b> | <b>3.467</b> | <b>0.092 - 0.331</b> | <b>5.26x10<sup>-4</sup></b>  | <b>1.46x10<sup>-4</sup></b>     | <b>37.216</b>         | <b>1403</b>           | <b>977</b>         |
| Amygdala (LH)           | 0.322                         | 0.327                             | 0.067        | 4.810        | 0.191 - 0.453        | <b>1.51x10<sup>-6</sup></b>  | <b>5.05x10<sup>-7</sup></b>     | 47.145                | 1429                  | 986                |

**Abbreviations:** Beta, correlation beta; CI, confidence interval; *I*<sup>2</sup>, heterogeneity index. All *p*-values are reported, uncorrected. For ease of comparison, Cohen's *d* estimates and *p*-values extracted using 3T data only are provided alongside Cohen's *d* estimates and *p*-values extracted from the full sample, combining 1.5T and 3T datasets. *P*-values that passed the Bonferroni-adjusted alpha level ( $p < 1.49 \times 10^{-4}$ ) are highlighted in bold red (see Methods for statistical threshold determination). Brain regions reported as significant in the full sample, but not in the 3T sample, are highlighted in yellow.

**Supplementary Table 15.** Effect sizes for cortical thickness differences (Cohen's *d*) between healthy controls and the 'all-epilepsies' phenotype; 3T field strength only.

| Structure              | Cohen's <i>d</i><br>(3T only) | Cohen's <i>d</i><br>(full sample) | SE   | Z score | 95% CI        | <i>P</i> value<br>(3T only) | <i>P</i> value<br>(full sample) | <i>f</i> <sup>2</sup> | Number of<br>controls | Number<br>of cases |
|------------------------|-------------------------------|-----------------------------------|------|---------|---------------|-----------------------------|---------------------------------|-----------------------|-----------------------|--------------------|
| R_precentral           | -0.41                         | -0.40                             | 0.04 | -9.06   | -0.49 - -0.32 | <b>1.34x10-19</b>           | <b>8.85x10-20</b>               | 27.62                 | 1583                  | 1987               |
| L_precentral           | -0.40                         | -0.38                             | 0.04 | -9.31   | -0.48 - -0.32 | <b>1.31x10-20</b>           | <b>1.82x10-18</b>               | 21.96                 | 1579                  | 1991               |
| L_caudalmiddlefrontal  | -0.32                         | -0.32                             | 0.04 | -8.05   | -0.4 - -0.25  | <b>8.22x10-16</b>           | <b>2.11x10-15</b>               | 14.37                 | 1584                  | 1994               |
| R_superiorparietal     | -0.32                         | -0.31                             | 0.10 | -3.28   | -0.51 - -0.13 | 1.04x10-3                   | 8.13x10-4                       | 85.05                 | 1587                  | 1991               |
| R_caudalmiddlefrontal  | -0.31                         | -0.31                             | 0.05 | -5.84   | -0.42 - -0.21 | <b>5.09x10-9</b>            | <b>2.09x10-9</b>                | 48.45                 | 1587                  | 1992               |
| L_paracental           | -0.31                         | -0.31                             | 0.07 | -4.52   | -0.45 - -0.18 | <b>6.26x10-6</b>            | <b>2.05x10-6</b>                | 69.37                 | 1584                  | 1994               |
| R_paracental           | -0.31                         | -0.32                             | 0.06 | -5.45   | -0.42 - -0.2  | <b>5.13x10-8</b>            | <b>2.19x10-9</b>                | 54.17                 | 1588                  | 1992               |
| L_superiorparietal     | -0.29                         | -0.29                             | 0.08 | -3.68   | -0.45 - -0.14 | 2.34x10-4                   | <b>1.78x10-4</b>                | 77.22                 | 1581                  | 1991               |
| R_superiorfrontal      | -0.28                         | -0.27                             | 0.06 | -4.67   | -0.4 - -0.17  | <b>2.97x10-6</b>            | <b>4.49x10-6</b>                | 60.20                 | 1584                  | 1991               |
| L_superiorfrontal      | -0.28                         | -0.28                             | 0.06 | -4.99   | -0.4 - -0.17  | <b>6.00x10-7</b>            | <b>1.51x10-7</b>                | 54.46                 | 1583                  | 1992               |
| R_precuneus            | -0.28                         | -0.28                             | 0.07 | -4.06   | -0.42 - -0.14 | <b>4.90x10-5</b>            | <b>2.70x10-5</b>                | 69.21                 | 1588                  | 1988               |
| L_entorhinal           | -0.26                         | -0.26                             | 0.06 | -4.04   | -0.38 - -0.13 | <b>5.44x10-5</b>            | <b>2.04x10-5</b>                | 56.86                 | 1341                  | 1663               |
| L_precuneus            | -0.25                         | -0.25                             | 0.09 | -2.85   | -0.42 - -0.08 | 4.30x10-3                   | 2.66x10-3                       | 81.09                 | 1583                  | 1992               |
| L_supramarginal        | -0.24                         | -0.23                             | 0.06 | -3.98   | -0.36 - -0.12 | <b>6.99x10-5</b>            | <b>9.87x10-5</b>                | 59.40                 | 1540                  | 1898               |
| R_supramarginal        | -0.23                         | -0.22                             | 0.06 | -4.07   | -0.34 - -0.12 | <b>4.65x10-5</b>            | <b>5.24x10-5</b>                | 53.44                 | 1531                  | 1906               |
| R_rostralmiddlefrontal | -0.22                         | -0.20                             | 0.06 | -4.01   | -0.33 - -0.11 | <b>6.01x10-5</b>            | 5.94x10-4                       | 52.28                 | 1588                  | 1991               |
| L_temporalpole         | -0.21                         | -0.20                             | 0.06 | -3.44   | -0.34 - -0.09 | 5.76x10-4                   | 7.49x10-4                       | 61.85                 | 1578                  | 1990               |
| R_cuneus               | -0.21                         | -0.20                             | 0.04 | -5.35   | -0.29 - -0.13 | <b>8.88x10-8</b>            | <b>9.68x10-8</b>                | 11.43                 | 1586                  | 1990               |
| R_parstriangularis     | -0.21                         | -0.20                             | 0.04 | -5.70   | -0.28 - -0.14 | <b>1.22x10-8</b>            | <b>4.25x10-8</b>                | 3.05                  | 1586                  | 1991               |
| L_middletemporal       | -0.21                         | -0.20                             | 0.07 | -2.91   | -0.35 - -0.07 | 3.65x10-3                   | 4.01x10-3                       | 70.19                 | 1483                  | 1893               |
| L_inferiorparietal     | -0.21                         | -0.20                             | 0.07 | -2.87   | -0.35 - -0.07 | 4.05x10-3                   | 5.29x10-3                       | 71.93                 | 1573                  | 1985               |
| L_parstriangularis     | -0.20                         | -0.19                             | 0.05 | -3.92   | -0.31 - -0.1  | <b>8.89x10-5</b>            | <b>1.29x10-4</b>                | 45.84                 | 1584                  | 1993               |

|                        |       |       |      |       |               |                             |                             |       |      |      |
|------------------------|-------|-------|------|-------|---------------|-----------------------------|-----------------------------|-------|------|------|
| L_lateraloccipital     | -0.19 | -0.19 | 0.09 | -2.05 | -0.38 - -0.01 | 4.00x10 <sup>-2</sup>       | 3.58x10 <sup>-2</sup>       | 83.97 | 1584 | 1993 |
| R_lateraloccipital     | -0.19 | -0.20 | 0.07 | -2.75 | -0.33 - -0.06 | 5.99x10 <sup>-3</sup>       | 1.77x10 <sup>-3</sup>       | 70.64 | 1587 | 1991 |
| L_transversetemporal   | -0.19 | -0.19 | 0.04 | -4.27 | -0.28 - -0.1  | <b>1.97x10<sup>-5</sup></b> | <b>1.05x10<sup>-5</sup></b> | 28.81 | 1581 | 1994 |
| L_fusiform             | -0.19 | -0.19 | 0.06 | -2.98 | -0.31 - -0.07 | 2.86x10 <sup>-3</sup>       | 2.10x10 <sup>-3</sup>       | 63.91 | 1581 | 1991 |
| R_temporalpole         | -0.18 | -0.18 | 0.05 | -3.45 | -0.29 - -0.08 | 5.63x10 <sup>-4</sup>       | 5.51x10 <sup>-4</sup>       | 48.72 | 1584 | 1986 |
| R_inferiorparietal     | -0.18 | -0.17 | 0.08 | -2.43 | -0.33 - -0.04 | 1.52x10 <sup>-2</sup>       | 2.15x10 <sup>-2</sup>       | 74.50 | 1577 | 1978 |
| R_transversetemporal   | -0.18 | -0.18 | 0.05 | -3.99 | -0.27 - -0.09 | <b>6.67x10<sup>-5</sup></b> | <b>2.81x10<sup>-5</sup></b> | 30.17 | 1588 | 1992 |
| L_lingual              | -0.18 | -0.18 | 0.09 | -2.01 | -0.35 - 0     | 4.45x10 <sup>-2</sup>       | 3.50x10 <sup>-2</sup>       | 81.92 | 1583 | 1994 |
| R_parsopercularis      | -0.17 | -0.18 | 0.04 | -4.52 | -0.25 - -0.1  | <b>6.15x10<sup>-6</sup></b> | <b>6.48x10<sup>-7</sup></b> | 8.20  | 1586 | 1992 |
| L_superiortemporal     | -0.17 | -0.18 | 0.08 | -2.03 | -0.34 - -0.01 | 4.19x10 <sup>-2</sup>       | 2.62x10 <sup>-2</sup>       | 78.87 | 1469 | 1875 |
| L_parsorbitalis        | -0.17 | -0.15 | 0.05 | -3.70 | -0.26 - -0.08 | 2.14x10 <sup>-4</sup>       | 2.37x10 <sup>-3</sup>       | 31.23 | 1584 | 1992 |
| L_parsopercularis      | -0.16 | -0.15 | 0.06 | -2.78 | -0.28 - -0.05 | 5.47x10 <sup>-3</sup>       | 7.12x10 <sup>-3</sup>       | 57.82 | 1582 | 1992 |
| L_rostralmiddlefrontal | -0.16 | -0.15 | 0.06 | -2.57 | -0.29 - -0.04 | 1.02x10 <sup>-2</sup>       | 2.15x10 <sup>-2</sup>       | 63.69 | 1583 | 1990 |
| R_parsorbitalis        | -0.16 | -0.14 | 0.05 | -3.13 | -0.26 - -0.06 | 1.75x10 <sup>-3</sup>       | 8.27x10 <sup>-3</sup>       | 45.14 | 1588 | 1990 |
| R_lingual              | -0.16 | -0.16 | 0.05 | -3.07 | -0.26 - -0.06 | 2.14x10 <sup>-3</sup>       | 8.14x10 <sup>-4</sup>       | 43.24 | 1587 | 1989 |
| R_entorhinal           | -0.15 | -0.16 | 0.06 | -2.58 | -0.26 - -0.04 | 9.77x10 <sup>-3</sup>       | 4.24x10 <sup>-3</sup>       | 44.89 | 1319 | 1636 |
| L_cuneus               | -0.14 | -0.16 | 0.10 | -1.42 | -0.33 - 0.05  | 1.56x10 <sup>-1</sup>       | 7.27x10 <sup>-2</sup>       | 85.10 | 1582 | 1994 |
| L_postcentral          | -0.14 | -0.13 | 0.09 | -1.48 | -0.32 - 0.05  | 1.39x10 <sup>-1</sup>       | 1.67x10 <sup>-1</sup>       | 83.75 | 1581 | 1989 |
| R_lateralorbitofrontal | -0.13 | -0.11 | 0.05 | -2.47 | -0.24 - -0.03 | 1.34x10 <sup>-2</sup>       | 3.87x10 <sup>-2</sup>       | 49.86 | 1585 | 1990 |
| R_middletemporal       | -0.13 | -0.12 | 0.04 | -3.26 | -0.21 - -0.05 | 1.12x10 <sup>-3</sup>       | 3.02x10 <sup>-3</sup>       | 14.01 | 1577 | 1983 |
| R_pericalcarine        | -0.13 | -0.13 | 0.05 | -2.38 | -0.23 - -0.02 | 1.72x10 <sup>-2</sup>       | 9.15x10 <sup>-3</sup>       | 47.12 | 1588 | 1989 |
| R_frontalpole          | -0.12 | -0.11 | 0.05 | -2.46 | -0.22 - -0.02 | 1.39x10 <sup>-2</sup>       | 2.37x10 <sup>-2</sup>       | 40.44 | 1588 | 1990 |
| L_pericalcarine        | -0.12 | -0.13 | 0.09 | -1.31 | -0.3 - 0.06   | 1.91x10 <sup>-1</sup>       | 1.43x10 <sup>-1</sup>       | 83.50 | 1584 | 1992 |
| R_superiortemporal     | -0.12 | -0.12 | 0.06 | -1.93 | -0.24 - 0     | 5.32x10 <sup>-2</sup>       | 3.84x10 <sup>-2</sup>       | 60.72 | 1491 | 1893 |
| R_postcentral          | -0.12 | -0.12 | 0.11 | -1.13 | -0.33 - 0.09  | 2.57x10 <sup>-1</sup>       | 2.49x10 <sup>-1</sup>       | 87.35 | 1582 | 1990 |
| L parahippocampal      | -0.12 | -0.10 | 0.05 | -2.49 | -0.21 - -0.02 | 1.28x10 <sup>-2</sup>       | 1.83x10 <sup>-2</sup>       | 32.14 | 1571 | 1983 |
| R_fusiform             | -0.11 | -0.12 | 0.05 | -2.21 | -0.2 - -0.01  | 2.74x10 <sup>-2</sup>       | 8.56x10 <sup>-3</sup>       | 36.43 | 1588 | 1990 |



|                            |       |       |      |       |               |                       |                       |       |      |      |
|----------------------------|-------|-------|------|-------|---------------|-----------------------|-----------------------|-------|------|------|
| R_parahippocampal          | -0.10 | -0.09 | 0.04 | -2.87 | -0.17 - -0.03 | 4.17x10 <sup>-3</sup> | 6.95x10 <sup>-3</sup> | 0.01  | 1584 | 1986 |
| L_posteriorcingulate       | -0.10 | -0.08 | 0.04 | -2.20 | -0.18 - -0.01 | 2.78x10 <sup>-2</sup> | 6.01x10 <sup>-2</sup> | 27.50 | 1584 | 1992 |
| R_posteriorcingulate       | -0.10 | -0.07 | 0.06 | -1.61 | -0.21 - 0.02  | 1.06x10 <sup>-1</sup> | 2.65x10 <sup>-1</sup> | 59.49 | 1588 | 1989 |
| L_bankssts                 | -0.10 | -0.09 | 0.08 | -1.15 | -0.26 - 0.07  | 2.48x10 <sup>-1</sup> | 2.45x10 <sup>-1</sup> | 77.56 | 1521 | 1865 |
| L_frontalpole              | -0.09 | -0.08 | 0.05 | -1.80 | -0.18 - 0.01  | 7.17x10 <sup>-2</sup> | 1.04x10 <sup>-1</sup> | 34.88 | 1582 | 1991 |
| L_inferiortemporal         | -0.08 | -0.09 | 0.06 | -1.37 | -0.2 - 0.04   | 1.70x10 <sup>-1</sup> | 1.37x10 <sup>-1</sup> | 58.70 | 1583 | 1988 |
| L_lateralorbitofrontal     | -0.08 | -0.07 | 0.05 | -1.64 | -0.17 - 0.02  | 1.01x10 <sup>-1</sup> | 1.46x10 <sup>-1</sup> | 36.45 | 1579 | 1993 |
| R_medialorbitofrontal      | -0.07 | -0.05 | 0.04 | -2.00 | -0.14 - 0     | 4.55x10 <sup>-2</sup> | 1.26x10 <sup>-1</sup> | 0.00  | 1570 | 1958 |
| R_inferiortemporal         | -0.06 | -0.07 | 0.04 | -1.79 | -0.13 - 0.01  | 7.34x10 <sup>-2</sup> | 8.36x10 <sup>-2</sup> | 0.00  | 1586 | 1990 |
| L_isthmuscingulate         | -0.05 | -0.05 | 0.04 | -1.41 | -0.13 - 0.02  | 1.59x10 <sup>-1</sup> | 1.72x10 <sup>-1</sup> | 6.35  | 1583 | 1990 |
| R_bankssts                 | -0.04 | -0.06 | 0.07 | -0.65 | -0.18 - 0.09  | 5.17x10 <sup>-1</sup> | 3.66x10 <sup>-1</sup> | 67.78 | 1558 | 1956 |
| R_insula                   | -0.03 | -0.02 | 0.05 | -0.63 | -0.12 - 0.06  | 5.27x10 <sup>-1</sup> | 6.42x10 <sup>-1</sup> | 35.04 | 1549 | 1965 |
| L_rostralanteriorcingulate | -0.02 | -0.01 | 0.06 | -0.31 | -0.14 - 0.1   | 7.55x10 <sup>-1</sup> | 8.34x10 <sup>-1</sup> | 60.56 | 1579 | 1981 |
| L_medialorbitofrontal      | 0.00  | 0.01  | 0.04 | -0.07 | -0.07 - 0.07  | 9.43x10 <sup>-1</sup> | 8.82x10 <sup>-1</sup> | 0.00  | 1566 | 1963 |
| R_caudalanteriorcingulate  | 0.00  | 0.01  | 0.06 | 0.03  | -0.12 - 0.13  | 9.78x10 <sup>-1</sup> | 8.24x10 <sup>-1</sup> | 64.73 | 1586 | 1989 |
| R_isthmuscingulate         | 0.02  | 0.01  | 0.05 | 0.29  | -0.09 - 0.12  | 7.70x10 <sup>-1</sup> | 8.56x10 <sup>-1</sup> | 44.84 | 1585 | 1990 |
| L_insula                   | 0.03  | 0.01  | 0.05 | 0.61  | -0.06 - 0.12  | 5.44x10 <sup>-1</sup> | 7.73x10 <sup>-1</sup> | 33.62 | 1544 | 1959 |
| L_caudalanteriorcingulate  | 0.05  | 0.04  | 0.04 | 1.24  | -0.03 - 0.14  | 2.14x10 <sup>-1</sup> | 3.59x10 <sup>-1</sup> | 24.59 | 1579 | 1978 |
| R_rostralanteriorcingulate | 0.07  | 0.09  | 0.05 | 1.47  | -0.03 - 0.17  | 1.43x10 <sup>-1</sup> | 8.64x10 <sup>-2</sup> | 43.23 | 1586 | 1988 |

**Abbreviations:** Beta, correlation beta; CI, confidence interval;  $I^2$ , heterogeneity index. All  $p$ -values are reported, uncorrected. See Supplementary Table 3 for a list of cortical abbreviations. For ease of comparison, Cohen's  $d$  estimates and  $p$ -values extracted using 3T data only are provided alongside Cohen's  $d$  estimates and  $p$ -values extracted from the full sample, combining 1.5T and 3T datasets.  $P$ -values that passed the Bonferroni-adjusted alpha level ( $p < 1.49 \times 10^{-4}$ ) are highlighted in bold red (see Methods for statistical threshold determination). Brain regions reported as significant in the full sample, but not in the 3T sample, are highlighted in yellow. Brain regions reported as significant in the 3T sample, but not in the full sample, are highlighted in green.

**Supplementary Table 16.** Effect sizes for cortical thickness differences (Cohen's *d*) between healthy controls and the 'MTLE-L' phenotype; 3T field strength only.

| Structure              | Cohen's <i>d</i><br>(3T only) | Cohen's <i>d</i><br>(full sample) | SE          | Z score      | 95% CI               | <i>P</i> value<br>(3T only) | <i>P</i> value<br>(full sample) | <i>f</i> <sup>2</sup> | Number of<br>controls | Number<br>of cases |
|------------------------|-------------------------------|-----------------------------------|-------------|--------------|----------------------|-----------------------------|---------------------------------|-----------------------|-----------------------|--------------------|
| L_precuneus            | -0.60                         | -0.40                             | 0.13        | -4.47        | -0.86 - -0.34        | <b>7.90x10-6</b>            | <b>7.35x10-5</b>                | 72.03                 | 1277                  | 384                |
| R_precentral           | -0.55                         | -0.49                             | 0.07        | -8.01        | -0.68 - -0.41        | <b>1.17x10-15</b>           | <b>2.37x10-10</b>               | 7.52                  | 1279                  | 384                |
| L_superiorparietal     | -0.54                         | -0.40                             | 0.14        | -3.75        | -0.81 - -0.26        | <b>1.75x10-4</b>            | 9.17x10-4                       | 75.60                 | 1276                  | 384                |
| R_precuneus            | -0.53                         | -0.40                             | 0.10        | -5.17        | -0.73 - -0.33        | <b>2.33x10-7</b>            | <b>5.16x10-6</b>                | 51.38                 | 1282                  | 384                |
| R_superiorparietal     | -0.53                         | -0.40                             | 0.16        | -3.33        | -0.85 - -0.22        | 8.65x10-4                   | 2.97x10-3                       | 80.80                 | 1281                  | 384                |
| L_precentral           | -0.50                         | -0.40                             | 0.08        | -6.47        | -0.66 - -0.35        | <b>1.01x10-10</b>           | <b>8.64x10-9</b>                | 21.45                 | 1273                  | 384                |
| R_caudalmiddlefrontal  | -0.48                         | -0.40                             | 0.09        | -5.48        | -0.65 - -0.31        | <b>4.28x10-8</b>            | <b>3.61x10-7</b>                | 35.26                 | 1282                  | 384                |
| L_superiorfrontal      | -0.46                         | -0.40                             | 0.07        | -6.48        | -0.59 - -0.32        | <b>9.43x10-11</b>           | <b>1.02x10-11</b>               | 10.13                 | 1277                  | 384                |
| L_paracental           | -0.46                         | -0.40                             | 0.10        | -4.54        | -0.67 - -0.26        | <b>5.55x10-6</b>            | <b>1.61x10-5</b>                | 51.94                 | 1278                  | 384                |
| L_entorhinal           | -0.44                         | -0.40                             | 0.08        | -5.77        | -0.58 - -0.29        | <b>7.78x10-9</b>            | <b>7.35x10-10</b>               | 0.00                  | 1041                  | 278                |
| L_caudalmiddlefrontal  | -0.43                         | -0.40                             | 0.06        | -6.69        | -0.56 - -0.31        | <b>2.18x10-11</b>           | <b>7.07x10-9</b>                | 2.86                  | 1278                  | 384                |
| L_superiortemporal     | -0.43                         | -0.40                             | 0.12        | -3.46        | -0.67 - -0.18        | 5.34x10-4                   | 3.11x10-4                       | 65.68                 | 1164                  | 361                |
| R_superiorfrontal      | -0.41                         | -0.40                             | 0.06        | -6.58        | -0.53 - -0.29        | <b>4.79x10-11</b>           | <b>1.44x10-9</b>                | 0.00                  | 1279                  | 384                |
| L_fusiform             | -0.40                         | -0.40                             | 0.06        | -6.48        | -0.53 - -0.28        | <b>9.44x10-11</b>           | <b>2.19x10-7</b>                | 0.00                  | 1276                  | 384                |
| R_paracental           | -0.40                         | -0.40                             | 0.08        | -5.17        | -0.56 - -0.25        | <b>2.38x10-7</b>            | <b>5.14x10-7</b>                | 22.54                 | 1282                  | 384                |
| L_lingual              | -0.39                         | -0.40                             | 0.14        | -2.83        | -0.66 - -0.12        | 4.60x10-3                   | 7.89x10-3                       | 74.18                 | 1277                  | 384                |
| L_postcentral          | -0.38                         | -0.40                             | 0.14        | -2.76        | -0.65 - -0.11        | 5.82x10-3                   | 1.67x10-2                       | 73.88                 | 1275                  | 383                |
| R_postcentral          | -0.38                         | -0.40                             | 0.14        | -2.70        | -0.66 - -0.11        | 6.92x10-3                   | 1.83x10-2                       | 75.74                 | 1278                  | 384                |
| L_lateraloccipital     | -0.36                         | -0.40                             | 0.15        | -2.43        | -0.66 - -0.07        | 1.52x10-2                   | 3.88x10-2                       | 78.39                 | 1278                  | 384                |
| L_temporalpole         | -0.35                         | -0.40                             | 0.06        | -5.66        | -0.48 - -0.23        | <b>1.52x10-8</b>            | <b>3.33x10-6</b>                | 0.35                  | 1276                  | 383                |
| <b>R_supramarginal</b> | <b>-0.35</b>                  | <b>-0.40</b>                      | <b>0.09</b> | <b>-4.11</b> | <b>-0.52 - -0.19</b> | <b>3.89x10-5</b>            | <b>6.53x10-4</b>                | <b>32.23</b>          | <b>1226</b>           | <b>372</b>         |

|                               |              |              |             |              |                      |                             |                             |              |             |            |
|-------------------------------|--------------|--------------|-------------|--------------|----------------------|-----------------------------|-----------------------------|--------------|-------------|------------|
| L_supramarginal               | -0.35        | -0.40        | 0.09        | -3.71        | -0.53 - -0.16        | 2.05x10 <sup>-4</sup>       | 2.95x10 <sup>-3</sup>       | 42.27        | 1234        | 367        |
| R_inferiorparietal            | -0.35        | -0.40        | 0.11        | -3.21        | -0.57 - -0.14        | 1.34x10 <sup>-3</sup>       | 1.61x10 <sup>-2</sup>       | 58.84        | 1271        | 383        |
| L parahippocampal             | -0.34        | -0.40        | 0.06        | -5.45        | -0.46 - -0.22        | <b>4.93x10<sup>-8</sup></b> | <b>3.95x10<sup>-5</sup></b> | 0.00         | 1269        | 382        |
| L_middletemporal              | -0.32        | -0.40        | 0.10        | -3.17        | -0.52 - -0.12        | 1.53x10 <sup>-3</sup>       | 2.50x10 <sup>-3</sup>       | 49.49        | 1178        | 360        |
| <b>R_rostralmiddlefrontal</b> | <b>-0.32</b> | <b>-0.40</b> | <b>0.08</b> | <b>-3.83</b> | <b>-0.48 - -0.16</b> | <b>1.29x10<sup>-4</sup></b> | <b>1.07x10<sup>-2</sup></b> | <b>30.57</b> | <b>1282</b> | <b>384</b> |
| R_parstriangularis            | -0.31        | -0.40        | 0.06        | -4.97        | -0.43 - -0.19        | <b>6.85x10<sup>-7</sup></b> | <b>2.16x10<sup>-6</sup></b> | 0.00         | 1280        | 384        |
| L_parstriangularis            | -0.31        | -0.40        | 0.10        | -3.21        | -0.51 - -0.12        | 1.35x10 <sup>-3</sup>       | 2.30x10 <sup>-3</sup>       | 48.35        | 1278        | 383        |
| R_lateraloccipital            | -0.31        | -0.40        | 0.11        | -2.71        | -0.53 - -0.08        | 6.68x10 <sup>-3</sup>       | 3.64x10 <sup>-2</sup>       | 61.07        | 1281        | 384        |
| L_inferiorparietal            | -0.30        | -0.40        | 0.13        | -2.31        | -0.56 - -0.05        | 2.09x10 <sup>-2</sup>       | 6.13x10 <sup>-2</sup>       | 71.40        | 1267        | 382        |
| L_rostralmiddlefrontal        | -0.27        | -0.40        | 0.10        | -2.62        | -0.47 - -0.07        | 8.91x10 <sup>-3</sup>       | 4.41x10 <sup>-2</sup>       | 52.05        | 1278        | 384        |
| L_parsopercularis             | -0.25        | -0.40        | 0.11        | -2.31        | -0.46 - -0.04        | 2.10x10 <sup>-2</sup>       | 3.50x10 <sup>-2</sup>       | 57.43        | 1276        | 383        |
| L_inferiortemporal            | -0.24        | -0.40        | 0.08        | -2.92        | -0.4 - -0.08         | 3.45x10 <sup>-3</sup>       | 5.65x10 <sup>-3</sup>       | 29.11        | 1277        | 384        |
| R_cuneus                      | -0.22        | -0.40        | 0.08        | -2.87        | -0.37 - -0.07        | 4.09x10 <sup>-3</sup>       | 8.02x10 <sup>-3</sup>       | 21.19        | 1280        | 384        |
| L_parsorbitalis               | -0.21        | -0.40        | 0.09        | -2.42        | -0.38 - -0.04        | 1.56x10 <sup>-2</sup>       | 1.02x10 <sup>-1</sup>       | 36.48        | 1278        | 384        |
| R_posteriorcingulate          | -0.21        | -0.40        | 0.09        | -2.37        | -0.38 - -0.04        | 1.80x10 <sup>-2</sup>       | 1.23x10 <sup>-1</sup>       | 36.79        | 1282        | 383        |
| R_fusiform                    | -0.20        | -0.40        | 0.06        | -3.28        | -0.33 - -0.08        | 1.03x10 <sup>-3</sup>       | 1.00x10 <sup>-3</sup>       | 0.00         | 1282        | 384        |
| R_superiortemporal            | -0.19        | -0.40        | 0.06        | -2.93        | -0.31 - -0.06        | 3.36x10 <sup>-3</sup>       | 7.44x10 <sup>-3</sup>       | 0.00         | 1185        | 370        |
| L_pericalcarine               | -0.19        | -0.40        | 0.13        | -1.42        | -0.44 - 0.07         | 1.55x10 <sup>-1</sup>       | 1.05x10 <sup>-1</sup>       | 71.70        | 1278        | 383        |
| R_lateralorbitofrontal        | -0.19        | -0.40        | 0.11        | -1.71        | -0.4 - 0.03          | 8.74x10 <sup>-2</sup>       | 2.40x10 <sup>-1</sup>       | 58.53        | 1281        | 384        |
| R_parsopercularis             | -0.18        | -0.40        | 0.09        | -2.00        | -0.35 - 0            | 4.53x10 <sup>-2</sup>       | 5.21x10 <sup>-2</sup>       | 38.75        | 1281        | 384        |
| R_parsorbitalis               | -0.18        | -0.40        | 0.08        | -2.16        | -0.34 - -0.02        | 3.06x10 <sup>-2</sup>       | 7.20x10 <sup>-2</sup>       | 29.91        | 1282        | 384        |
| R_lingual                     | -0.18        | -0.40        | 0.11        | -1.73        | -0.39 - 0.02         | 8.36x10 <sup>-2</sup>       | 1.14x10 <sup>-1</sup>       | 55.88        | 1282        | 384        |
| L_cuneus                      | -0.18        | -0.40        | 0.14        | -1.28        | -0.46 - 0.1          | 2.00x10 <sup>-1</sup>       | 1.34x10 <sup>-1</sup>       | 75.60        | 1276        | 384        |
| R_transversetemporal          | -0.16        | -0.40        | 0.07        | -2.19        | -0.3 - -0.02         | 2.87x10 <sup>-2</sup>       | 1.72x10 <sup>-2</sup>       | 15.98        | 1282        | 384        |
| L_transversetemporal          | -0.16        | -0.40        | 0.07        | -2.40        | -0.3 - -0.03         | 1.65x10 <sup>-2</sup>       | 3.58x10 <sup>-2</sup>       | 8.49         | 1275        | 384        |
| R_pericalcarine               | -0.16        | -0.40        | 0.08        | -1.94        | -0.32 - 0            | 5.22x10 <sup>-2</sup>       | 3.73x10 <sup>-2</sup>       | 27.98        | 1282        | 383        |
| R parahippocampal             | -0.16        | -0.40        | 0.09        | -1.81        | -0.34 - 0.01         | 7.08x10 <sup>-2</sup>       | 1.46x10 <sup>-1</sup>       | 39.75        | 1278        | 384        |

|                                   |       |       |      |       |               |                       |                       |       |      |     |
|-----------------------------------|-------|-------|------|-------|---------------|-----------------------|-----------------------|-------|------|-----|
| <b>R_frontalpole</b>              | -0.14 | -0.40 | 0.07 | -2.18 | -0.27 - -0.01 | 2.95x10 <sup>-2</sup> | 9.53x10 <sup>-2</sup> | 4.54  | 1282 | 383 |
| <b>L_bankssts</b>                 | -0.13 | -0.40 | 0.12 | -1.10 | -0.37 - 0.1   | 2.72x10 <sup>-1</sup> | 3.72x10 <sup>-1</sup> | 64.52 | 1216 | 357 |
| <b>R_medialorbitofrontal</b>      | -0.12 | -0.40 | 0.06 | -1.95 | -0.24 - 0     | 5.14x10 <sup>-2</sup> | 2.23x10 <sup>-1</sup> | 0.00  | 1282 | 382 |
| <b>R_bankssts</b>                 | -0.11 | -0.40 | 0.11 | -1.03 | -0.33 - 0.1   | 3.04x10 <sup>-1</sup> | 2.51x10 <sup>-1</sup> | 59.72 | 1252 | 378 |
| <b>L_frontalpole</b>              | -0.10 | -0.40 | 0.06 | -1.54 | -0.22 - 0.03  | 1.24x10 <sup>-1</sup> | 2.96x10 <sup>-1</sup> | 0.00  | 1277 | 382 |
| <b>L_lateralorbitofrontal</b>     | -0.10 | -0.40 | 0.09 | -1.14 | -0.27 - 0.07  | 2.54x10 <sup>-1</sup> | 4.11x10 <sup>-1</sup> | 34.08 | 1277 | 384 |
| <b>R_middletemporal</b>           | -0.10 | -0.40 | 0.08 | -1.16 | -0.26 - 0.07  | 2.46x10 <sup>-1</sup> | 4.13x10 <sup>-1</sup> | 31.24 | 1271 | 382 |
| <b>R_entorhinal</b>               | -0.08 | -0.40 | 0.10 | -0.86 | -0.28 - 0.11  | 3.90x10 <sup>-1</sup> | 3.10x10 <sup>-1</sup> | 33.51 | 1015 | 273 |
| <b>R_caudalanteriorcingulate</b>  | -0.08 | -0.40 | 0.11 | -0.72 | -0.3 - 0.14   | 4.71x10 <sup>-1</sup> | 5.76x10 <sup>-1</sup> | 60.66 | 1280 | 383 |
| <b>R_inferiortemporal</b>         | -0.05 | -0.40 | 0.08 | -0.59 | -0.2 - 0.11   | 5.54x10 <sup>-1</sup> | 5.22x10 <sup>-1</sup> | 21.06 | 1280 | 384 |
| <b>L_isthmuscingulate</b>         | -0.05 | -0.40 | 0.08 | -0.56 | -0.21 - 0.12  | 5.74x10 <sup>-1</sup> | 7.91x10 <sup>-1</sup> | 29.51 | 1277 | 383 |
| <b>L_posteriorcingulate</b>       | -0.05 | -0.40 | 0.06 | -0.76 | -0.17 - 0.07  | 4.46x10 <sup>-1</sup> | 8.45x10 <sup>-1</sup> | 0.00  | 1278 | 383 |
| <b>R_temporalpole</b>             | -0.04 | -0.40 | 0.06 | -0.67 | -0.16 - 0.08  | 5.04x10 <sup>-1</sup> | 5.86x10 <sup>-1</sup> | 0.00  | 1280 | 383 |
| <b>R_isthmuscingulate</b>         | -0.03 | -0.40 | 0.08 | -0.41 | -0.2 - 0.13   | 6.80x10 <sup>-1</sup> | 9.31x10 <sup>-1</sup> | 29.45 | 1279 | 383 |
| <b>L_medialorbitofrontal</b>      | 0.00  | -0.40 | 0.08 | 0.06  | -0.16 - 0.17  | 9.55x10 <sup>-1</sup> | 6.13x10 <sup>-1</sup> | 28.96 | 1278 | 384 |
| <b>L_rostralanteriorcingulate</b> | 0.03  | -0.40 | 0.08 | 0.34  | -0.12 - 0.17  | 7.35x10 <sup>-1</sup> | 3.88x10 <sup>-1</sup> | 18.43 | 1276 | 383 |
| <b>R_insula</b>                   | 0.04  | -0.40 | 0.06 | 0.70  | -0.08 - 0.17  | 4.83x10 <sup>-1</sup> | 2.54x10 <sup>-1</sup> | 0.00  | 1257 | 377 |
| <b>R_rostralanteriorcingulate</b> | 0.16  | -0.40 | 0.06 | 2.56  | 0.04 - 0.28   | 1.03x10 <sup>-2</sup> | 8.80x10 <sup>-4</sup> | 0.00  | 1282 | 383 |
| <b>L_insula</b>                   | 0.18  | -0.40 | 0.08 | 2.27  | 0.02 - 0.33   | 2.33x10 <sup>-2</sup> | 5.31x10 <sup>-2</sup> | 22.78 | 1254 | 374 |
| <b>L_caudalanteriorcingulate</b>  | 0.19  | -0.40 | 0.06 | 3.11  | 0.07 - 0.32   | 1.89x10 <sup>-3</sup> | 2.55x10 <sup>-3</sup> | 0.00  | 1277 | 383 |

**Abbreviations:** Beta, correlation beta; CI, confidence interval;  $I^2$ , heterogeneity index. All  $p$ -values are reported, uncorrected. See Supplementary Table 3 for a list of cortical abbreviations. For ease of comparison, Cohen's  $d$  estimates and  $p$ -values extracted using 3T data only are provided alongside Cohen's  $d$  estimates and  $p$ -values extracted from the full sample, combining 1.5T and 3T datasets.  $P$ -values that passed the Bonferroni-adjusted alpha level ( $p < 1.49 \times 10^{-4}$ ) are highlighted in bold red (see Methods for statistical threshold determination). Brain regions reported as significant in the 3T sample, but not in the full sample, are highlighted in green

**Supplementary Table 17.** Effect sizes for cortical thickness differences (Cohen's *d*) between healthy controls and the 'MTLE-R' phenotype; 3T field strength only.

| Structure                    | Cohen's <i>d</i><br>(3T only) | Cohen's <i>d</i><br>(full sample) | SE          | Z score      | 95% CI        | <i>P</i> value<br>(3T only)  | <i>P</i> value<br>(full sample) | <i>r</i> <sup>2</sup> | Number of<br>controls | Number<br>of cases |
|------------------------------|-------------------------------|-----------------------------------|-------------|--------------|---------------|------------------------------|---------------------------------|-----------------------|-----------------------|--------------------|
| <b>R_precentral</b>          | <b>-0.54</b>                  | <b>-0.52</b>                      | <b>0.09</b> | <b>-6.11</b> | -0.72 - -0.37 | <b>9.73x10<sup>-10</sup></b> | <b>1.25x10<sup>-9</sup></b>     | <b>33</b>             | <b>1246</b>           | <b>313</b>         |
| <b>L_paracental</b>          | <b>-0.52</b>                  | <b>-0.5</b>                       | <b>0.11</b> | <b>-4.65</b> | -0.73 - -0.3  | <b>3.35x10<sup>-6</sup></b>  | <b>7.67x10<sup>-7</sup></b>     | <b>56.09</b>          | <b>1245</b>           | <b>314</b>         |
| R_superiorparietal           | -0.51                         | -0.49                             | 0.19        | -2.73        | -0.87 - -0.14 | 6.35x10 <sup>-3</sup>        | 5.03x10 <sup>-3</sup>           | 84.78                 | 1248                  | 314                |
| R_precuneus                  | -0.48                         | -0.46                             | 0.13        | -3.69        | -0.74 - -0.23 | 2.24x10 <sup>-4</sup>        | 1.87x10 <sup>-4</sup>           | 68.78                 | 1249                  | 314                |
| <b>L_precentral</b>          | <b>-0.46</b>                  | <b>-0.42</b>                      | <b>0.09</b> | <b>-5.33</b> | -0.63 - -0.29 | <b>1.01x10<sup>-7</sup></b>  | <b>4.31x10<sup>-6</sup></b>     | <b>29.93</b>          | <b>1240</b>           | <b>314</b>         |
| <b>R_paracental</b>          | <b>-0.43</b>                  | <b>-0.42</b>                      | <b>0.07</b> | <b>-6.36</b> | -0.57 - -0.3  | <b>1.99x10<sup>-10</sup></b> | <b>6.24x10<sup>-11</sup></b>    | <b>2.25</b>           | <b>1249</b>           | <b>314</b>         |
| L_superiorparietal           | -0.42                         | -0.4                              | 0.13        | -3.21        | -0.68 - -0.16 | 1.33x10 <sup>-3</sup>        | 1.27x10 <sup>-3</sup>           | 69.45                 | 1244                  | 314                |
| L_precuneus                  | -0.41                         | -0.38                             | 0.12        | -3.47        | -0.64 - -0.18 | 5.19x10 <sup>-4</sup>        | 6.47x10 <sup>-4</sup>           | 61.69                 | 1244                  | 314                |
| <b>R_lateraloccipital</b>    | <b>-0.4</b>                   | <b>-0.37</b>                      | <b>0.1</b>  | <b>-3.94</b> | -0.59 - -0.2  | <b>8.08x10<sup>-5</sup></b>  | <b>1.79x10<sup>-4</sup></b>     | <b>46.98</b>          | <b>1248</b>           | <b>314</b>         |
| <b>L_supramarginal</b>       | <b>-0.39</b>                  | <b>-0.36</b>                      | <b>0.1</b>  | <b>-3.85</b> | -0.68 - -0.1  | <b>1.18x10<sup>-4</sup></b>  | <b>2.25x10<sup>-4</sup></b>     | <b>45.38</b>          | <b>1201</b>           | <b>297</b>         |
| L_lingual                    | -0.39                         | -0.38                             | 0.15        | -2.63        | -0.59 - -0.19 | 8.47x10 <sup>-3</sup>        | 5.22x10 <sup>-3</sup>           | 75.99                 | 1244                  | 314                |
| L_postcentral                | -0.39                         | -0.33                             | 0.15        | -2.61        | -0.68 - -0.1  | 9.02x10 <sup>-3</sup>        | 2.43x10 <sup>-2</sup>           | 76.13                 | 1242                  | 314                |
| R_postcentral                | -0.38                         | -0.36                             | 0.16        | -2.32        | -0.7 - -0.06  | 2.02x10 <sup>-2</sup>        | 1.87x10 <sup>-2</sup>           | 80.16                 | 1245                  | 314                |
| <b>L_superiorfrontal</b>     | <b>-0.36</b>                  | <b>-0.35</b>                      | <b>0.11</b> | <b>-3.32</b> | -0.57 - -0.15 | <b>9.00x10<sup>-4</sup></b>  | <b>1.59x10<sup>-4</sup></b>     | <b>54.07</b>          | <b>1244</b>           | <b>313</b>         |
| <b>R_caudalmiddlefrontal</b> | <b>-0.34</b>                  | <b>-0.31</b>                      | <b>0.08</b> | <b>-3.99</b> | -0.5 - -0.17  | <b>6.59x10<sup>-5</sup></b>  | <b>3.03x10<sup>-4</sup></b>     | <b>27.16</b>          | <b>1249</b>           | <b>314</b>         |
| R_superiorfrontal            | -0.33                         | -0.3                              | 0.12        | -2.63        | -0.57 - -0.08 | 8.61x10 <sup>-3</sup>        | 1.14x10 <sup>-2</sup>           | 65.76                 | 1246                  | 314                |
| <b>L_transversetemporal</b>  | <b>-0.31</b>                  | <b>-0.31</b>                      | <b>0.08</b> | <b>-3.92</b> | -0.51 - -0.12 | <b>8.83x10<sup>-5</sup></b>  | <b>2.15x10<sup>-5</sup></b>     | <b>19.87</b>          | <b>1242</b>           | <b>314</b>         |
| L_caudalmiddlefrontal        | -0.31                         | -0.3                              | 0.1         | -2.99        | -0.52 - -0.11 | 2.76x10 <sup>-3</sup>        | 2.15x10 <sup>-3</sup>           | 51.64                 | 1245                  | 314                |
| R_supramarginal              | -0.31                         | -0.27                             | 0.1         | -3.21        | -0.52 - -0.1  | 1.32x10 <sup>-3</sup>        | 6.33x10 <sup>-3</sup>           | 43.79                 | 1193                  | 304                |
| R_temporalpole               | -0.31                         | -0.28                             | 0.11        | -2.91        | -0.46 - -0.15 | 3.57x10 <sup>-3</sup>        | 6.41x10 <sup>-3</sup>           | 53.12                 | 1246                  | 313                |

|                             |              |              |             |              |               |                             |                             |              |             |            |
|-----------------------------|--------------|--------------|-------------|--------------|---------------|-----------------------------|-----------------------------|--------------|-------------|------------|
| L_lateraloccipital          | -0.3         | -0.25        | 0.12        | -2.37        | -0.54 - -0.05 | 1.77x10 <sup>-2</sup>       | 4.25x10 <sup>-2</sup>       | 66.01        | 1245        | 314        |
| L_cuneus                    | -0.29        | -0.29        | 0.15        | -1.99        | -0.58 - 0     | 4.62x10 <sup>-2</sup>       | 3.58x10 <sup>-2</sup>       | 75.65        | 1243        | 314        |
| R_inferiorparietal          | -0.29        | -0.24        | 0.15        | -1.97        | -0.57 - 0     | 4.83x10 <sup>-2</sup>       | 8.41x10 <sup>-2</sup>       | 75.21        | 1238        | 314        |
| <b>R_parsopercularis</b>    | <b>-0.28</b> | <b>-0.27</b> | <b>0.08</b> | <b>-3.55</b> | -0.53 - -0.03 | <b>3.92x10<sup>-4</sup></b> | <b>1.45x10<sup>-4</sup></b> | <b>18.47</b> | <b>1248</b> | <b>314</b> |
| L_inferiorparietal          | -0.28        | -0.24        | 0.13        | -2.22        | -0.43 - -0.12 | 2.66x10 <sup>-2</sup>       | 6.04x10 <sup>-2</sup>       | 67.18        | 1234        | 312        |
| R_lingual                   | -0.27        | -0.28        | 0.08        | -3.42        | -0.43 - -0.12 | 6.36x10 <sup>-4</sup>       | 2.35x10 <sup>-4</sup>       | 21.84        | 1248        | 314        |
| <b>R_transversetemporal</b> | <b>-0.25</b> | <b>-0.24</b> | <b>0.07</b> | <b>-3.84</b> | -0.38 - -0.12 | <b>1.21x10<sup>-4</sup></b> | <b>1.94x10<sup>-4</sup></b> | <b>0</b>     | <b>1249</b> | <b>314</b> |
| R_cuneus                    | -0.25        | -0.25        | 0.09        | -2.74        | -0.42 - -0.07 | 6.06x10 <sup>-3</sup>       | 3.31x10 <sup>-3</sup>       | 35.99        | 1247        | 314        |
| L_pericalcarine             | -0.25        | -0.26        | 0.18        | -1.4         | -0.59 - -0.1  | 1.62x10 <sup>-1</sup>       | 1.14x10 <sup>-1</sup>       | 83.14        | 1245        | 314        |
| L_bankssts                  | -0.25        | -0.22        | 0.16        | -1.55        | -0.56 - -0.07 | 1.22x10 <sup>-1</sup>       | 1.44x10 <sup>-1</sup>       | 78.56        | 1184        | 301        |
| L_parsorbitalis             | -0.24        | -0.19        | 0.09        | -2.59        | -0.42 - -0.06 | 9.65x10 <sup>-3</sup>       | 5.27x10 <sup>-2</sup>       | 37.37        | 1245        | 314        |
| R_superiortemporal          | -0.23        | -0.23        | 0.11        | -2.1         | -0.45 - -0.02 | 3.54x10 <sup>-2</sup>       | 2.21x10 <sup>-2</sup>       | 54.73        | 1152        | 300        |
| R_parsorbitalis             | -0.23        | -0.15        | 0.14        | -1.62        | -0.5 - -0.05  | 1.05x10 <sup>-1</sup>       | 3.20x10 <sup>-1</sup>       | 73.71        | 1249        | 314        |
| R_pericalcarine             | -0.21        | -0.23        | 0.09        | -2.38        | -0.38 - -0.04 | 1.72x10 <sup>-2</sup>       | 4.39x10 <sup>-3</sup>       | 31.49        | 1249        | 314        |
| R_middletemporal            | -0.21        | -0.16        | 0.11        | -1.94        | -0.41 - 0     | 5.28x10 <sup>-2</sup>       | 1.41x10 <sup>-1</sup>       | 52.94        | 1238        | 313        |
| R parahippocampal           | -0.2         | -0.18        | 0.07        | -3.1         | -0.33 - -0.08 | 1.92x10 <sup>-3</sup>       | 6.05x10 <sup>-3</sup>       | 0            | 1245        | 314        |
| R_fusiform                  | -0.2         | -0.17        | 0.07        | -2.7         | -0.44 - -0.04 | 6.91x10 <sup>-3</sup>       | 2.51x10 <sup>-2</sup>       | 12.01        | 1249        | 314        |
| L_rostralmiddlefrontal      | -0.2         | -0.16        | 0.12        | -1.65        | -0.34 - -0.05 | 9.82x10 <sup>-2</sup>       | 2.04x10 <sup>-1</sup>       | 64.51        | 1245        | 313        |
| R_parstriangularis          | -0.19        | -0.17        | 0.09        | -2.23        | -0.36 - -0.02 | 2.59x10 <sup>-2</sup>       | 5.41x10 <sup>-2</sup>       | 30.64        | 1247        | 313        |
| R_bankssts                  | -0.19        | -0.18        | 0.1         | -1.85        | -0.4 - -0.02  | 6.43x10 <sup>-2</sup>       | 5.48x10 <sup>-2</sup>       | 46.66        | 1219        | 309        |
| L_parsopercularis           | -0.19        | -0.15        | 0.11        | -1.76        | -0.38 - -0.01 | 7.92x10 <sup>-2</sup>       | 1.43x10 <sup>-1</sup>       | 53.61        | 1243        | 314        |
| R_entorhinal                | -0.18        | -0.18        | 0.11        | -1.63        | -0.39 - -0.04 | 1.02x10 <sup>-1</sup>       | 7.23x10 <sup>-2</sup>       | 38.73        | 982         | 223        |
| L_fusiform                  | -0.17        | -0.16        | 0.07        | -2.5         | -0.29 - -0.04 | 1.23x10 <sup>-2</sup>       | 1.18x10 <sup>-2</sup>       | 0            | 1243        | 313        |
| L_temporalpole              | -0.16        | -0.15        | 0.08        | -1.98        | -0.38 - -0.06 | 4.74x10 <sup>-2</sup>       | 4.16x10 <sup>-2</sup>       | 19.92        | 1241        | 314        |
| L_parstriangularis          | -0.16        | -0.15        | 0.11        | -1.45        | -0.37 - -0.06 | 1.47x10 <sup>-1</sup>       | 1.43x10 <sup>-1</sup>       | 56.6         | 1245        | 314        |
| L_middletemporal            | -0.16        | -0.11        | 0.11        | -1.45        | -0.31 - 0     | 1.46x10 <sup>-1</sup>       | 3.13x10 <sup>-1</sup>       | 54.45        | 1146        | 299        |
| R_posteriorcingulate        | -0.16        | -0.09        | 0.09        | -1.7         | -0.34 - -0.02 | 8.97x10 <sup>-2</sup>       | 4.07x10 <sup>-1</sup>       | 38.06        | 1249        | 313        |

|                            |       |       |      |       |              |                       |                       |       |      |     |
|----------------------------|-------|-------|------|-------|--------------|-----------------------|-----------------------|-------|------|-----|
| R_inferiortemporal         | -0.14 | -0.11 | 0.11 | -1.34 | -0.35 - 0.07 | 1.80x10 <sup>-1</sup> | 2.77x10 <sup>-1</sup> | 53.07 | 1247 | 314 |
| R_insula                   | -0.14 | -0.11 | 0.11 | -1.28 | -0.35 - 0.07 | 2.01x10 <sup>-1</sup> | 2.89x10 <sup>-1</sup> | 54.97 | 1210 | 309 |
| L_entorhinal               | -0.13 | -0.11 | 0.08 | -1.62 | -0.28 - 0.03 | 1.05x10 <sup>-1</sup> | 1.31x10 <sup>-1</sup> | 0     | 1008 | 231 |
| L_superiortemporal         | -0.13 | -0.14 | 0.13 | -0.95 | -0.39 - 0.13 | 3.43x10 <sup>-1</sup> | 2.67x10 <sup>-1</sup> | 69.12 | 1132 | 294 |
| L_frontalpole              | -0.11 | -0.08 | 0.09 | -1.18 | -0.28 - 0.07 | 2.37x10 <sup>-1</sup> | 3.71x10 <sup>-1</sup> | 35.53 | 1243 | 314 |
| L_inferiortemporal         | -0.08 | -0.06 | 0.07 | -1.19 | -0.21 - 0.05 | 2.32x10 <sup>-1</sup> | 3.59x10 <sup>-1</sup> | 0     | 1244 | 314 |
| L_posteriorcingulate       | -0.08 | -0.06 | 0.07 | -1.26 | -0.21 - 0.05 | 2.08x10 <sup>-1</sup> | 3.70x10 <sup>-1</sup> | 0.01  | 1245 | 314 |
| R_frontalpole              | -0.06 | -0.03 | 0.1  | -0.53 | -0.26 - 0.15 | 5.96x10 <sup>-1</sup> | 7.76x10 <sup>-1</sup> | 52.12 | 1249 | 314 |
| R_rostralmiddlefrontal     | -0.06 | -0.03 | 0.11 | -0.51 | -0.27 - 0.16 | 6.11x10 <sup>-1</sup> | 8.04x10 <sup>-1</sup> | 55.15 | 1249 | 314 |
| L_lateralorbitofrontal     | -0.05 | -0.02 | 0.08 | -0.59 | -0.2 - 0.11  | 5.55x10 <sup>-1</sup> | 8.20x10 <sup>-1</sup> | 16.84 | 1241 | 314 |
| L_insula                   | -0.01 | -0.02 | 0.07 | -0.09 | -0.19 - 0.17 | 9.32x10 <sup>-1</sup> | 7.17x10 <sup>-1</sup> | 0     | 1207 | 308 |
| L parahippocampal          | -0.01 | -0.02 | 0.09 | -0.1  | -0.14 - 0.12 | 9.21x10 <sup>-1</sup> | 8.52x10 <sup>-1</sup> | 35.81 | 1236 | 313 |
| R_lateralorbitofrontal     | 0     | 0.03  | 0.08 | -0.02 | -0.15 - 0.15 | 9.84x10 <sup>-1</sup> | 7.36x10 <sup>-1</sup> | 16.11 | 1246 | 314 |
| L_rostralanteriorcingulate | 0.01  | 0     | 0.1  | 0.07  | -0.19 - 0.2  | 9.44x10 <sup>-1</sup> | 9.73x10 <sup>-1</sup> | 46.8  | 1240 | 311 |
| R_caudalanteriorcingulate  | 0.03  | 0.06  | 0.13 | 0.23  | -0.22 - 0.28 | 8.19x10 <sup>-1</sup> | 6.17x10 <sup>-1</sup> | 66.87 | 1247 | 313 |
| L_caudalanteriorcingulate  | 0.04  | -0.02 | 0.07 | 0.51  | -0.1 - 0.17  | 6.07x10 <sup>-1</sup> | 7.77x10 <sup>-1</sup> | 4.78  | 1240 | 313 |
| L_medialorbitofrontal      | 0.06  | 0.08  | 0.07 | 0.89  | -0.07 - 0.19 | 3.72x10 <sup>-1</sup> | 1.98x10 <sup>-1</sup> | 0     | 1227 | 312 |
| L_isthmuscingulate         | 0.09  | 0.08  | 0.08 | 1.03  | -0.08 - 0.25 | 3.02x10 <sup>-1</sup> | 3.05x10 <sup>-1</sup> | 28.3  | 1244 | 314 |
| R_medialorbitofrontal      | 0.11  | 0.15  | 0.09 | 1.26  | -0.06 - 0.29 | 2.07x10 <sup>-1</sup> | 1.02x10 <sup>-1</sup> | 33.4  | 1231 | 312 |
| R_isthmuscingulate         | 0.18  | 0.14  | 0.1  | 1.73  | -0.02 - 0.38 | 8.36x10 <sup>-2</sup> | 1.45x10 <sup>-1</sup> | 50.33 | 1246 | 314 |
| R_rostralanteriorcingulate | 0.22  | 0.25  | 0.11 | 2.06  | 0.01 - 0.44  | 3.97x10 <sup>-2</sup> | 1.63x10 <sup>-2</sup> | 55.64 | 1249 | 313 |

**Abbreviations:** Beta, correlation beta; CI, confidence interval;  $I^2$ , heterogeneity index. All  $p$ -values are reported, uncorrected. See Supplementary Table 3 for a list of cortical abbreviations. For ease of comparison, Cohen's  $d$  estimates and  $p$ -values extracted using 3T data only are provided alongside Cohen's  $d$  estimates and  $p$ -values extracted from the full sample, combining 1.5T and 3T datasets.  $P$ -values that passed the Bonferroni-adjusted alpha level ( $p < 1.49 \times 10^{-4}$ ) are highlighted in bold red (see Methods for statistical threshold determination). Brain regions reported as significant in the full sample, but not in the 3T sample, are highlighted in yellow. Brain regions reported as significant in the 3T sample, but not in the full sample, are highlighted in green.

**Supplementary Table 18.** Effect sizes for cortical thickness differences (Cohen's *d*) between healthy controls and the 'IGE' phenotype; 3T field strength only.

| Structure              | Cohen's <i>d</i><br>(3T only) | Cohen's <i>d</i><br>(full sample) | SE          | Z score      | 95% CI               | <i>P</i> value<br>(3T only) | <i>P</i> value<br>(full sample) | <i>r</i> <sup>2</sup> | Number of<br>controls | Number<br>of cases |
|------------------------|-------------------------------|-----------------------------------|-------------|--------------|----------------------|-----------------------------|---------------------------------|-----------------------|-----------------------|--------------------|
| <b>R_precentral</b>    | <b>-0.39</b>                  | <b>-0.39</b>                      | <b>0.07</b> | <b>-5.35</b> | <b>-0.53 - -0.24</b> | <b>8.92x10<sup>-8</sup></b> | <b>5.27x10<sup>-8</sup></b>     | <b>0.56</b>           | <b>1025</b>           | <b>294</b>         |
| <b>L_precentral</b>    | <b>-0.34</b>                  | <b>-0.34</b>                      | <b>0.07</b> | <b>-4.78</b> | <b>-0.48 - -0.2</b>  | <b>1.77x10<sup>-6</sup></b> | <b>1.75x10<sup>-6</sup></b>     | <b>0.00</b>           | <b>1024</b>           | <b>296</b>         |
| R_temporalpole         | -0.27                         | -0.28                             | 0.09        | -2.95        | -0.45 - -0.09        | 3.13x10 <sup>-3</sup>       | 2.82x10 <sup>-3</sup>           | 31.92                 | 1026                  | 295                |
| L_caudalmiddlefrontal  | -0.20                         | -0.20                             | 0.07        | -2.77        | -0.34 - -0.06        | 5.60x10 <sup>-3</sup>       | 5.08x10 <sup>-3</sup>           | 2.04                  | 1028                  | 296                |
| L_paracental           | -0.18                         | -0.18                             | 0.07        | -2.51        | -0.32 - -0.04        | 1.22x10 <sup>-2</sup>       | 1.25x10 <sup>-2</sup>           | 0.00                  | 1028                  | 296                |
| L_entorhinal           | -0.18                         | -0.19                             | 0.08        | -2.13        | -0.34 - -0.01        | 3.29x10 <sup>-2</sup>       | 2.15x10 <sup>-2</sup>           | 0.00                  | 801                   | 241                |
| R_caudalmiddlefrontal  | -0.17                         | -0.17                             | 0.10        | -1.79        | -0.36 - 0.02         | 7.32x10 <sup>-2</sup>       | 6.66x10 <sup>-2</sup>           | 37.04                 | 1029                  | 296                |
| L_temporalpole         | -0.16                         | -0.17                             | 0.08        | -1.94        | -0.33 - 0            | 5.22x10 <sup>-2</sup>       | 4.53x10 <sup>-2</sup>           | 20.49                 | 1022                  | 296                |
| L_supramarginal        | -0.14                         | -0.14                             | 0.08        | -1.84        | -0.3 - 0.01          | 6.56x10 <sup>-2</sup>       | 6.57x10 <sup>-2</sup>           | 6.16                  | 984                   | 273                |
| R_entorhinal           | -0.14                         | -0.15                             | 0.14        | -1.00        | -0.41 - 0.14         | 3.20x10 <sup>-1</sup>       | 2.54x10 <sup>-1</sup>           | 58.60                 | 791                   | 239                |
| R_parsorbitalis        | -0.12                         | -0.12                             | 0.07        | -1.72        | -0.26 - 0.02         | 8.58x10 <sup>-2</sup>       | 8.70x10 <sup>-2</sup>           | 0.00                  | 1030                  | 296                |
| R_superiorparietal     | -0.12                         | -0.13                             | 0.07        | -1.72        | -0.26 - 0.02         | 8.62x10 <sup>-2</sup>       | 5.81x10 <sup>-2</sup>           | 0.00                  | 1029                  | 296                |
| R_lateralorbitofrontal | -0.12                         | -0.11                             | 0.07        | -1.67        | -0.26 - 0.02         | 9.49x10 <sup>-2</sup>       | 1.32x10 <sup>-1</sup>           | 0.00                  | 1027                  | 296                |
| L_middletemporal       | -0.12                         | -0.11                             | 0.07        | -1.58        | -0.26 - 0.03         | 1.15x10 <sup>-1</sup>       | 1.28x10 <sup>-1</sup>           | 0.00                  | 944                   | 278                |
| R_medialorbitofrontal  | -0.11                         | -0.11                             | 0.07        | -1.59        | -0.26 - 0.03         | 1.11x10 <sup>-1</sup>       | 1.39x10 <sup>-1</sup>           | 0.00                  | 1012                  | 291                |
| R_paracental           | -0.11                         | -0.13                             | 0.11        | -1.09        | -0.32 - 0.09         | 2.77x10 <sup>-1</sup>       | 1.86x10 <sup>-1</sup>           | 47.25                 | 1030                  | 296                |
| L_superiorparietal     | -0.11                         | -0.13                             | 0.09        | -1.21        | -0.29 - 0.07         | 2.25x10 <sup>-1</sup>       | 1.18x10 <sup>-1</sup>           | 32.65                 | 1026                  | 296                |
| L_inferiorparietal     | -0.10                         | -0.13                             | 0.09        | -1.10        | -0.29 - 0.08         | 2.70x10 <sup>-1</sup>       | 1.52x10 <sup>-1</sup>           | 35.41                 | 1017                  | 296                |
| L_transversetemporal   | -0.10                         | -0.10                             | 0.07        | -1.43        | -0.24 - 0.04         | 1.51x10 <sup>-1</sup>       | 1.56x10 <sup>-1</sup>           | 0.00                  | 1025                  | 296                |
| R_superiorfrontal      | -0.10                         | -0.10                             | 0.08        | -1.24        | -0.26 - 0.06         | 2.17x10 <sup>-1</sup>       | 2.27x10 <sup>-1</sup>           | 19.34                 | 1026                  | 296                |



|                            |       |       |      |       |              |                       |                       |       |      |     |
|----------------------------|-------|-------|------|-------|--------------|-----------------------|-----------------------|-------|------|-----|
| L_fusiform                 | -0.10 | -0.11 | 0.09 | -1.02 | -0.28 - 0.09 | 3.05x10 <sup>-1</sup> | 2.50x10 <sup>-1</sup> | 34.87 | 1025 | 295 |
| L_lateraloccipital         | -0.09 | -0.13 | 0.15 | -0.60 | -0.39 - 0.21 | 5.51x10 <sup>-1</sup> | 4.05x10 <sup>-1</sup> | 75.06 | 1028 | 295 |
| L_bankssts                 | -0.09 | -0.08 | 0.12 | -0.77 | -0.32 - 0.14 | 4.40x10 <sup>-1</sup> | 5.03x10 <sup>-1</sup> | 53.16 | 995  | 271 |
| R_inferiortemporal         | -0.08 | -0.09 | 0.07 | -1.12 | -0.22 - 0.06 | 2.61x10 <sup>-1</sup> | 1.84x10 <sup>-1</sup> | 0.00  | 1028 | 296 |
| R_precuneus                | -0.07 | -0.09 | 0.09 | -0.85 | -0.24 - 0.1  | 3.98x10 <sup>-1</sup> | 2.39x10 <sup>-1</sup> | 23.58 | 1030 | 296 |
| R_transversetemporal       | -0.07 | -0.07 | 0.10 | -0.70 | -0.27 - 0.13 | 4.83x10 <sup>-1</sup> | 4.76x10 <sup>-1</sup> | 43.96 | 1030 | 296 |
| R_parsopercularis          | -0.07 | -0.08 | 0.07 | -1.00 | -0.21 - 0.07 | 3.19x10 <sup>-1</sup> | 2.37x10 <sup>-1</sup> | 0.00  | 1028 | 296 |
| R_supramarginal            | -0.06 | -0.07 | 0.08 | -0.81 | -0.21 - 0.09 | 4.16x10 <sup>-1</sup> | 3.51x10 <sup>-1</sup> | 0.00  | 974  | 269 |
| R_lingual                  | -0.06 | -0.06 | 0.10 | -0.58 | -0.26 - 0.14 | 5.63x10 <sup>-1</sup> | 5.54x10 <sup>-1</sup> | 44.69 | 1029 | 295 |
| R_middletemporal           | -0.06 | -0.07 | 0.07 | -0.82 | -0.2 - 0.08  | 4.14x10 <sup>-1</sup> | 3.58x10 <sup>-1</sup> | 0.00  | 1023 | 295 |
| L_insula                   | -0.06 | -0.06 | 0.07 | -0.81 | -0.2 - 0.08  | 4.20x10 <sup>-1</sup> | 3.78x10 <sup>-1</sup> | 0.00  | 989  | 292 |
| L_rostralanteriorcingulate | -0.06 | -0.04 | 0.11 | -0.50 | -0.27 - 0.16 | 6.18x10 <sup>-1</sup> | 7.24x10 <sup>-1</sup> | 52.44 | 1023 | 293 |
| R_pericalcarine            | -0.05 | -0.07 | 0.12 | -0.45 | -0.28 - 0.18 | 6.55x10 <sup>-1</sup> | 5.26x10 <sup>-1</sup> | 56.02 | 1030 | 295 |
| R_rostralmiddlefrontal     | -0.05 | -0.05 | 0.07 | -0.66 | -0.2 - 0.1   | 5.09x10 <sup>-1</sup> | 5.35x10 <sup>-1</sup> | 6.36  | 1030 | 296 |
| R_insula                   | -0.04 | -0.03 | 0.07 | -0.52 | -0.18 - 0.1  | 6.04x10 <sup>-1</sup> | 6.74x10 <sup>-1</sup> | 0.00  | 991  | 289 |
| L_pericalcarine            | -0.04 | -0.04 | 0.10 | -0.34 | -0.24 - 0.17 | 7.35x10 <sup>-1</sup> | 6.67x10 <sup>-1</sup> | 45.91 | 1028 | 296 |
| L_cuneus                   | -0.03 | -0.09 | 0.11 | -0.30 | -0.26 - 0.19 | 7.65x10 <sup>-1</sup> | 3.38x10 <sup>-1</sup> | 54.73 | 1026 | 296 |
| L_parsopercularis          | -0.03 | -0.02 | 0.11 | -0.28 | -0.25 - 0.19 | 7.77x10 <sup>-1</sup> | 8.23x10 <sup>-1</sup> | 53.23 | 1027 | 296 |
| R_cuneus                   | -0.03 | -0.08 | 0.10 | -0.31 | -0.23 - 0.17 | 7.59x10 <sup>-1</sup> | 3.25x10 <sup>-1</sup> | 43.05 | 1028 | 296 |
| R_rostralanteriorcingulate | -0.03 | -0.03 | 0.08 | -0.37 | -0.19 - 0.13 | 7.09x10 <sup>-1</sup> | 7.47x10 <sup>-1</sup> | 16.52 | 1028 | 296 |
| L_parstriangularis         | -0.02 | -0.01 | 0.08 | -0.30 | -0.17 - 0.12 | 7.63x10 <sup>-1</sup> | 8.51x10 <sup>-1</sup> | 7.20  | 1028 | 296 |
| L_inferiortemporal         | -0.02 | -0.04 | 0.08 | -0.27 | -0.19 - 0.14 | 7.90x10 <sup>-1</sup> | 6.45x10 <sup>-1</sup> | 20.94 | 1027 | 295 |
| R_parstriangularis         | -0.02 | -0.02 | 0.07 | -0.29 | -0.16 - 0.12 | 7.69x10 <sup>-1</sup> | 7.63x10 <sup>-1</sup> | 0.01  | 1028 | 296 |
| L_precuneus                | -0.02 | -0.04 | 0.09 | -0.24 | -0.19 - 0.15 | 8.14x10 <sup>-1</sup> | 6.66x10 <sup>-1</sup> | 23.86 | 1027 | 296 |
| L_frontalpole              | -0.01 | -0.02 | 0.09 | -0.17 | -0.18 - 0.16 | 8.65x10 <sup>-1</sup> | 8.40x10 <sup>-1</sup> | 25.46 | 1026 | 296 |
| L_superiortemporal         | -0.01 | -0.03 | 0.10 | -0.14 | -0.21 - 0.19 | 8.92x10 <sup>-1</sup> | 7.99x10 <sup>-1</sup> | 37.82 | 925  | 265 |
| L_superiorfrontal          | -0.01 | -0.01 | 0.07 | -0.12 | -0.15 - 0.14 | 9.05x10 <sup>-1</sup> | 8.53x10 <sup>-1</sup> | 5.11  | 1027 | 296 |

|                                  |       |       |      |       |              |                       |                       |       |      |     |
|----------------------------------|-------|-------|------|-------|--------------|-----------------------|-----------------------|-------|------|-----|
| <b>R_inferiorparietal</b>        | -0.01 | -0.03 | 0.09 | -0.07 | -0.18 - 0.17 | 9.47x10 <sup>-1</sup> | 7.61x10 <sup>-1</sup> | 29.81 | 1019 | 292 |
| <b>L_medialorbitofrontal</b>     | 0.00  | 0.00  | 0.07 | -0.01 | -0.14 - 0.14 | 9.89x10 <sup>-1</sup> | 9.84x10 <sup>-1</sup> | 0.00  | 1010 | 292 |
| <b>L_lingual</b>                 | 0.00  | 0.00  | 0.10 | 0.03  | -0.19 - 0.2  | 9.75x10 <sup>-1</sup> | 9.72x10 <sup>-1</sup> | 40.45 | 1027 | 296 |
| <b>R parahippocampal</b>         | 0.00  | 0.00  | 0.07 | 0.05  | -0.14 - 0.14 | 9.61x10 <sup>-1</sup> | 9.89x10 <sup>-1</sup> | 0.01  | 1026 | 292 |
| <b>L_parsorbitalis</b>           | 0.00  | 0.00  | 0.07 | 0.07  | -0.14 - 0.14 | 9.48x10 <sup>-1</sup> | 9.77x10 <sup>-1</sup> | 0.00  | 1028 | 295 |
| <b>L_isthmuscingulate</b>        | 0.01  | 0.00  | 0.11 | 0.05  | -0.21 - 0.22 | 9.63x10 <sup>-1</sup> | 9.68x10 <sup>-1</sup> | 50.14 | 1027 | 295 |
| <b>R_lateraloccipital</b>        | 0.02  | -0.05 | 0.16 | 0.10  | -0.29 - 0.32 | 9.20x10 <sup>-1</sup> | 7.23x10 <sup>-1</sup> | 76.38 | 1029 | 296 |
| <b>R_isthmuscingulate</b>        | 0.02  | 0.02  | 0.10 | 0.19  | -0.18 - 0.22 | 8.46x10 <sup>-1</sup> | 8.37x10 <sup>-1</sup> | 44.08 | 1027 | 296 |
| <b>L_rostralmiddlefrontal</b>    | 0.02  | 0.02  | 0.09 | 0.26  | -0.15 - 0.19 | 7.91x10 <sup>-1</sup> | 8.30x10 <sup>-1</sup> | 25.03 | 1027 | 294 |
| <b>L_posteriorcingulate</b>      | 0.03  | 0.03  | 0.09 | 0.34  | -0.14 - 0.2  | 7.37x10 <sup>-1</sup> | 7.23x10 <sup>-1</sup> | 28.08 | 1028 | 296 |
| <b>R_caudalanteriorcingulate</b> | 0.03  | 0.05  | 0.08 | 0.41  | -0.13 - 0.19 | 6.84x10 <sup>-1</sup> | 5.44x10 <sup>-1</sup> | 18.84 | 1028 | 296 |
| <b>R_frontalpole</b>             | 0.04  | 0.04  | 0.07 | 0.51  | -0.1 - 0.18  | 6.10x10 <sup>-1</sup> | 5.82x10 <sup>-1</sup> | 0.00  | 1030 | 296 |
| <b>L parahippocampal</b>         | 0.04  | 0.04  | 0.09 | 0.44  | -0.14 - 0.22 | 6.61x10 <sup>-1</sup> | 6.60x10 <sup>-1</sup> | 30.98 | 1019 | 293 |
| <b>R_fusiform</b>                | 0.04  | 0.03  | 0.10 | 0.40  | -0.16 - 0.24 | 6.88x10 <sup>-1</sup> | 7.96x10 <sup>-1</sup> | 43.53 | 1030 | 295 |
| <b>R_superiortemporal</b>        | 0.06  | 0.04  | 0.10 | 0.55  | -0.14 - 0.26 | 5.81x10 <sup>-1</sup> | 6.71x10 <sup>-1</sup> | 36.70 | 936  | 264 |
| <b>L_postcentral</b>             | 0.06  | 0.05  | 0.07 | 0.89  | -0.08 - 0.2  | 3.74x10 <sup>-1</sup> | 4.43x10 <sup>-1</sup> | 0.00  | 1025 | 295 |
| <b>R_postcentral</b>             | 0.07  | 0.06  | 0.09 | 0.76  | -0.11 - 0.24 | 4.49x10 <sup>-1</sup> | 5.07x10 <sup>-1</sup> | 28.63 | 1024 | 296 |
| <b>R_posteriorcingulate</b>      | 0.07  | 0.08  | 0.11 | 0.66  | -0.14 - 0.29 | 5.11x10 <sup>-1</sup> | 4.75x10 <sup>-1</sup> | 51.80 | 1030 | 295 |
| <b>L_caudalanteriorcingulate</b> | 0.08  | 0.09  | 0.08 | 0.93  | -0.09 - 0.24 | 3.53x10 <sup>-1</sup> | 3.02x10 <sup>-1</sup> | 20.35 | 1023 | 295 |
| <b>L_lateralorbitofrontal</b>    | 0.09  | 0.09  | 0.07 | 1.24  | -0.05 - 0.23 | 2.17x10 <sup>-1</sup> | 1.94x10 <sup>-1</sup> | 0.00  | 1023 | 296 |
| <b>R_bankssts</b>                | 0.12  | 0.10  | 0.12 | 0.95  | -0.12 - 0.36 | 3.40x10 <sup>-1</sup> | 4.10x10 <sup>-1</sup> | 60.11 | 1010 | 286 |

**Abbreviations:** Beta, correlation beta; CI, confidence interval;  $I^2$ , heterogeneity index. All  $p$ -values are reported, uncorrected. See Supplementary Table 3 for a list of cortical abbreviations. For ease of comparison, Cohen's  $d$  estimates and  $p$ -values extracted using 3T data only are provided alongside Cohen's  $d$  estimates and  $p$ -values extracted from the full sample, combining 1.5T and 3T datasets.  $P$ -values that passed the Bonferroni-adjusted alpha level ( $p < 1.49 \times 10^{-4}$ ) are highlighted in bold red (see Methods for statistical threshold determination).

**Supplementary Table 19.** Effect sizes for cortical thickness differences (Cohen's *d*) between healthy controls and the 'all-other-epilepsies' phenotype; 3T field strength only.

| Structure              | Cohen's <i>d</i><br>(3T only) | Cohen's <i>d</i><br>(full sample) | SE           | Z score       | 95% CI               | <i>P</i> value<br>(3T only) | <i>P</i> value<br>(full sample) | <i>f</i> <sup>2</sup> | Number of<br>controls | Number<br>of cases |
|------------------------|-------------------------------|-----------------------------------|--------------|---------------|----------------------|-----------------------------|---------------------------------|-----------------------|-----------------------|--------------------|
| L_precentral           | -0.375                        | -0.375                            | 0.046        | -8.113        | -0.465 - -0.284      | <b>4.94x10-16</b>           | <b>1.76x10-16</b>               | 0.658                 | 1423                  | 985                |
| R_precentral           | -0.346                        | -0.348                            | 0.046        | -7.554        | -0.436 - -0.256      | <b>4.20x10-14</b>           | <b>1.70x10-14</b>               | 0.000                 | 1429                  | 984                |
| R_paracental           | -0.345                        | -0.351                            | 0.047        | -7.294        | -0.438 - -0.252      | <b>3.00x10-13</b>           | <b>1.05x10-14</b>               | 4.439                 | 1432                  | 986                |
| L_caudalmiddlefrontal  | -0.286                        | -0.291                            | 0.046        | -6.255        | -0.376 - -0.196      | <b>3.98x10-10</b>           | <b>1.32x10-10</b>               | 0.000                 | 1428                  | 988                |
| L_paracental           | -0.256                        | -0.257                            | 0.046        | -5.608        | -0.346 - -0.167      | <b>2.05x10-8</b>            | <b>1.34x10-08</b>               | 0.000                 | 1428                  | 988                |
| L_superiorfrontal      | -0.242                        | -0.243                            | 0.059        | -4.079        | -0.358 - -0.126      | <b>4.51x10-5</b>            | <b>3.51x10-05</b>               | 34.457                | 1427                  | 987                |
| R_superiorfrontal      | -0.239                        | -0.235                            | 0.054        | -4.432        | -0.345 - -0.133      | <b>9.32x10-6</b>            | <b>7.15x10-06</b>               | 22.626                | 1429                  | 985                |
| R_cuneus               | -0.237                        | -0.234                            | 0.046        | -5.190        | -0.326 - -0.147      | <b>2.10x10-7</b>            | <b>2.15x10-07</b>               | 0.000                 | 1430                  | 984                |
| R_precuneus            | -0.232                        | -0.238                            | 0.057        | -4.109        | -0.343 - -0.122      | <b>3.97x10-5</b>            | <b>7.78x10-06</b>               | 28.591                | 1432                  | 982                |
| L_superiorparietal     | -0.222                        | -0.224                            | 0.046        | -4.856        | -0.312 - -0.132      | <b>1.20x10-6</b>            | <b>7.27x10-07</b>               | 0.004                 | 1425                  | 984                |
| R_superiorparietal     | -0.217                        | -0.22                             | 0.046        | -4.682        | -0.308 - -0.126      | <b>2.85x10-6</b>            | <b>1.15x10-06</b>               | 2.322                 | 1431                  | 985                |
| R_parstriangularis     | -0.214                        | -0.21                             | 0.046        | -4.697        | -0.304 - -0.125      | <b>2.64x10-6</b>            | <b>3.32x10-06</b>               | 0.002                 | 1430                  | 986                |
| R_caudalmiddlefrontal  | -0.212                        | -0.212                            | 0.046        | -4.653        | -0.302 - -0.123      | <b>3.27x10-6</b>            | <b>2.62x10-06</b>               | 0.000                 | 1432                  | 986                |
| R_rostralmiddlefrontal | <b>-0.206</b>                 | <b>-0.198</b>                     | <b>0.054</b> | <b>-3.826</b> | <b>-0.311 - -0.1</b> | <b>1.30x10-4</b>            | <b>1.58x10-04</b>               | <b>22.124</b>         | <b>1432</b>           | <b>985</b>         |
| R_supramarginal        | -0.204                        | -0.206                            | 0.047        | -4.324        | -0.296 - -0.111      | <b>1.53x10-5</b>            | <b>9.95x10-06</b>               | 0.000                 | 1376                  | 949                |
| R_lateraloccipital     | -0.198                        | -0.211                            | 0.046        | -4.339        | -0.288 - -0.109      | <b>1.43x10-5</b>            | <b>3.18x10-06</b>               | 0.003                 | 1431                  | 985                |
| L_transversetemporal   | -0.196                        | -0.2                              | 0.057        | -3.409        | -0.308 - -0.083      | 6.53x10-4                   | 6.62x10-04                      | 30.497                | 1425                  | 988                |
| R_lateralorbitofrontal | -0.181                        | -0.167                            | 0.057        | -3.166        | -0.293 - -0.069      | 1.54x10-3                   | 2.15x10-03                      | 29.917                | 1429                  | 984                |
| R_entorhinal           | -0.180                        | -0.197                            | 0.053        | -3.422        | -0.284 - -0.077      | 6.22x10-4                   | 7.30x10-04                      | 8.046                 | 1164                  | 889                |
| L_precuneus            | -0.172                        | -0.178                            | 0.050        | -3.416        | -0.271 - -0.073      | 6.36x10-4                   | 1.34x10-04                      | 13.612                | 1427                  | 986                |
| R_lingual              | -0.171                        | -0.18                             | 0.046        | -3.746        | -0.26 - -0.081       | 1.80x10-4                   | 7.12x10-05                      | 0.001                 | 1431                  | 984                |
| R_transversetemporal   | -0.169                        | -0.18                             | 0.046        | -3.712        | -0.259 - -0.08       | 2.06x10-4                   | 6.84x10-05                      | 0.002                 | 1432                  | 986                |
| R_parsorbitalis        | -0.161                        | -0.156                            | 0.053        | -3.036        | -0.265 - -0.057      | 2.40x10-3                   | 2.69x10-03                      | 20.495                | 1432                  | 984                |
| L_pericalcarine        | -0.160                        | -0.16                             | 0.055        | -2.902        | -0.268 - -0.052      | 3.70x10-3                   | 3.10x10-03                      | 25.577                | 1428                  | 987                |
| R_pericalcarine        | -0.158                        | -0.158                            | 0.049        | -3.210        | -0.255 - -0.062      | 1.33x10-3                   | 9.68x10-04                      | 10.765                | 1432                  | 985                |
| L_parstriangularis     | -0.146                        | -0.141                            | 0.046        | -3.213        | -0.236 - -0.057      | 1.31x10-3                   | 2.00x10-3                       | 0.002                 | 1428                  | 988                |

|                            |        |        |       |        |                 |                       |                       |        |      |     |
|----------------------------|--------|--------|-------|--------|-----------------|-----------------------|-----------------------|--------|------|-----|
| L_entorhinal               | -0.142 | -0.149 | 0.083 | -1.718 | -0.304 - 0.02   | 8.58x10 <sup>-2</sup> | 7.70x10 <sup>-2</sup> | 59.503 | 1191 | 901 |
| L_lateraloccipital         | -0.137 | -0.153 | 0.055 | -2.508 | -0.244 - -0.03  | 1.21x10 <sup>-2</sup> | 1.39x10 <sup>-3</sup> | 24.445 | 1428 | 988 |
| L_supramarginal            | -0.134 | -0.138 | 0.059 | -2.279 | -0.25 - -0.019  | 2.27x10 <sup>-2</sup> | 1.90x10 <sup>-2</sup> | 30.535 | 1384 | 949 |
| L_parsorbitalis            | -0.131 | -0.128 | 0.046 | -2.869 | -0.22 - -0.041  | 4.12x10 <sup>-3</sup> | 5.00x10 <sup>-3</sup> | 0.000  | 1428 | 987 |
| L_parsopercularis          | -0.123 | -0.122 | 0.048 | -2.535 | -0.218 - -0.028 | 1.13x10 <sup>-2</sup> | 1.00x10 <sup>-2</sup> | 8.606  | 1426 | 987 |
| L_cuneus                   | -0.121 | -0.142 | 0.061 | -1.995 | -0.24 - -0.002  | 4.60x10 <sup>-2</sup> | 4.00x10 <sup>-3</sup> | 37.263 | 1426 | 988 |
| R_parsopercularis          | -0.119 | -0.125 | 0.047 | -2.514 | -0.212 - -0.026 | 1.19x10 <sup>-2</sup> | 8.00x10 <sup>-3</sup> | 5.521  | 1431 | 986 |
| R_temporalpole             | -0.119 | -0.126 | 0.047 | -2.557 | -0.21 - -0.028  | 1.06x10 <sup>-2</sup> | 7.00x10 <sup>-3</sup> | 2.738  | 1429 | 983 |
| R_medialorbitofrontal      | -0.113 | -0.101 | 0.056 | -1.994 | -0.223 - -0.002 | 4.61x10 <sup>-2</sup> | 6.50x10 <sup>-2</sup> | 27.535 | 1414 | 961 |
| R_inferiorparietal         | -0.110 | -0.118 | 0.053 | -2.100 | -0.213 - -0.007 | 3.58x10 <sup>-2</sup> | 1.80x10 <sup>-2</sup> | 18.803 | 1421 | 977 |
| R_superiortemporal         | -0.107 | -0.11  | 0.058 | -1.823 | -0.221 - 0.008  | 6.83x10 <sup>-2</sup> | 5.90x10 <sup>-2</sup> | 29.393 | 1335 | 947 |
| R_frontalpole              | -0.097 | -0.098 | 0.046 | -2.135 | -0.187 - -0.008 | 3.28x10 <sup>-2</sup> | 3.00x10 <sup>-2</sup> | 0.004  | 1432 | 985 |
| L_rostralmiddlefrontal     | -0.095 | -0.097 | 0.062 | -1.532 | -0.216 - 0.026  | 1.26x10 <sup>-1</sup> | 1.16x10 <sup>-1</sup> | 39.618 | 1428 | 987 |
| L_lingual                  | -0.094 | -0.099 | 0.045 | -2.065 | -0.183 - -0.005 | 3.90x10 <sup>-2</sup> | 2.80x10 <sup>-2</sup> | 0.006  | 1427 | 988 |
| R_middletemporal           | -0.093 | -0.102 | 0.046 | -2.041 | -0.183 - -0.004 | 4.13x10 <sup>-2</sup> | 2.40x10 <sup>-2</sup> | 0.000  | 1421 | 981 |
| L_posteriorcingulate       | -0.091 | -0.089 | 0.062 | -1.476 | -0.212 - 0.03   | 1.40x10 <sup>-1</sup> | 1.45x10 <sup>-1</sup> | 39.249 | 1428 | 987 |
| L_isthmuscingulate         | -0.091 | -0.093 | 0.057 | -1.576 | -0.203 - 0.022  | 1.15x10 <sup>-1</sup> | 1.03x10 <sup>-1</sup> | 30.825 | 1427 | 986 |
| L_fusiform                 | -0.088 | -0.095 | 0.046 | -1.933 | -0.178 - 0.001  | 5.33x10 <sup>-2</sup> | 3.50x10 <sup>-2</sup> | 0.001  | 1426 | 987 |
| L_inferiorparietal         | -0.087 | -0.096 | 0.046 | -1.899 | -0.177 - 0.003  | 5.76x10 <sup>-2</sup> | 3.40x10 <sup>-2</sup> | 0.017  | 1417 | 983 |
| L_superiortemporal         | -0.082 | -0.092 | 0.058 | -1.414 | -0.197 - 0.032  | 1.57x10 <sup>-1</sup> | 1.23x10 <sup>-1</sup> | 28.471 | 1311 | 940 |
| L_temporalpole             | -0.081 | -0.088 | 0.068 | -1.191 | -0.214 - 0.052  | 2.34x10 <sup>-1</sup> | 2.00x10 <sup>-1</sup> | 48.995 | 1423 | 985 |
| L_frontalpole              | -0.080 | -0.089 | 0.046 | -1.761 | -0.169 - 0.009  | 7.83x10 <sup>-2</sup> | 5.10x10 <sup>-2</sup> | 0.000  | 1426 | 987 |
| R parahippocampal          | -0.079 | -0.076 | 0.046 | -1.724 | -0.168 - 0.011  | 8.47x10 <sup>-2</sup> | 9.30x10 <sup>-2</sup> | 0.000  | 1428 | 984 |
| R_bankssts                 | -0.076 | -0.081 | 0.064 | -1.184 | -0.201 - 0.05   | 2.36x10 <sup>-1</sup> | 2.01x10 <sup>-1</sup> | 42.001 | 1402 | 971 |
| R_fusiform                 | -0.072 | -0.086 | 0.062 | -1.162 | -0.193 - 0.049  | 2.45x10 <sup>-1</sup> | 1.64x10 <sup>-1</sup> | 39.391 | 1432 | 985 |
| L_lateralorbitofrontal     | -0.071 | -0.065 | 0.066 | -1.073 | -0.201 - 0.059  | 2.83x10 <sup>-1</sup> | 3.15x10 <sup>-1</sup> | 47.047 | 1424 | 987 |
| R_insula                   | -0.068 | -0.069 | 0.046 | -1.477 | -0.159 - 0.022  | 1.40x10 <sup>-1</sup> | 1.29x10 <sup>-1</sup> | 0.001  | 1393 | 978 |
| L_middletemporal           | -0.066 | -0.074 | 0.047 | -1.410 | -0.158 - 0.026  | 1.58x10 <sup>-1</sup> | 1.12x10 <sup>-1</sup> | 0.000  | 1326 | 946 |
| L_postcentral              | -0.066 | -0.065 | 0.046 | -1.437 | -0.155 - 0.024  | 1.51x10 <sup>-1</sup> | 1.52x10 <sup>-1</sup> | 0.009  | 1425 | 985 |
| R_posteriorcingulate       | -0.065 | -0.061 | 0.062 | -1.050 | -0.186 - 0.056  | 2.94x10 <sup>-1</sup> | 3.24x10 <sup>-1</sup> | 39.657 | 1432 | 986 |
| L parahippocampal          | -0.063 | -0.06  | 0.046 | -1.373 | -0.152 - 0.027  | 1.70x10 <sup>-1</sup> | 1.84x10 <sup>-1</sup> | 0.000  | 1419 | 983 |
| L_rostralanteriorcingulate | -0.026 | -0.023 | 0.069 | -0.379 | -0.161 - 0.109  | 7.05x10 <sup>-1</sup> | 7.31x10 <sup>-1</sup> | 50.462 | 1423 | 982 |

|                                   |        |        |       |        |                |                       |                       |               |      |     |
|-----------------------------------|--------|--------|-------|--------|----------------|-----------------------|-----------------------|---------------|------|-----|
| <b>R_postcentral</b>              | -0.025 | -0.024 | 0.046 | -0.554 | -0.114 - 0.064 | 5.80x10 <sup>-1</sup> | 5.97x10 <sup>-1</sup> | <b>0.003</b>  | 1428 | 984 |
| <b>R_inferiortemporal</b>         | -0.015 | -0.035 | 0.045 | -0.335 | -0.104 - 0.074 | 7.38x10 <sup>-1</sup> | 4.83x10 <sup>-1</sup> | <b>0.010</b>  | 1430 | 984 |
| <b>L_insula</b>                   | -0.014 | -0.015 | 0.053 | -0.260 | -0.118 - 0.09  | 7.95x10 <sup>-1</sup> | 7.77x10 <sup>-1</sup> | <b>19.334</b> | 1390 | 973 |
| <b>R_isthmuscingulate</b>         | -0.013 | -0.016 | 0.056 | -0.238 | -0.123 - 0.096 | 8.12x10 <sup>-1</sup> | 7.74x10 <sup>-1</sup> | <b>27.675</b> | 1429 | 985 |
| <b>L_medialorbitofrontal</b>      | -0.011 | -0.014 | 0.046 | -0.229 | -0.101 - 0.08  | 8.19x10 <sup>-1</sup> | 7.54x10 <sup>-1</sup> | <b>0.000</b>  | 1410 | 963 |
| <b>L_bankssts</b>                 | 0.002  | -0.007 | 0.063 | 0.028  | -0.122 - 0.126 | 9.77x10 <sup>-1</sup> | 9.18x10 <sup>-1</sup> | <b>37.993</b> | 1362 | 925 |
| <b>R_caudalanteriorcingulate</b>  | 0.005  | 0.007  | 0.049 | 0.112  | -0.091 - 0.102 | 9.11x10 <sup>-1</sup> | 8.88x10 <sup>-1</sup> | <b>10.586</b> | 1430 | 985 |
| <b>L_inferiortemporal</b>         | 0.008  | -0.007 | 0.049 | 0.153  | -0.089 - 0.104 | 8.79x10 <sup>-1</sup> | 9.03x10 <sup>-1</sup> | <b>11.283</b> | 1427 | 984 |
| <b>R_rostralanteriorcingulate</b> | 0.029  | 0.023  | 0.067 | 0.431  | -0.103 - 0.161 | 6.66x10 <sup>-1</sup> | 7.34x10 <sup>-1</sup> | <b>48.447</b> | 1431 | 984 |
| <b>L_caudalanteriorcingulate</b>  | 0.061  | 0.05   | 0.053 | 1.157  | -0.042 - 0.165 | 2.47x10 <sup>-1</sup> | 3.36x10 <sup>-1</sup> | <b>20.009</b> | 1423 | 975 |

**Abbreviations:** Beta, correlation beta; CI, confidence interval;  $I^2$ , heterogeneity index. All  $p$ -values are reported, uncorrected. See Supplementary Table 3 for a list of cortical abbreviations. For ease of comparison, Cohen's  $d$  estimates and  $p$ -values extracted using 3T data only are provided alongside Cohen's  $d$  estimates and  $p$ -values extracted from the full sample, combining 1.5T and 3T datasets.  $P$ -values that passed the Bonferroni-adjusted alpha level ( $p < 1.49 \times 10^{-4}$ ) are highlighted in bold red (see Methods for statistical threshold determination).

**Supplementary Table 20.** Average ages at onset of epilepsy per research centre.

| Research centre         | All-epilepsies | IGE        | MTLE-L       | MTLE-R      |
|-------------------------|----------------|------------|--------------|-------------|
| <b>BERN</b>             | -              | -          | -            | -           |
| <b>BONN</b>             | 16.86          | -          | 16.35        | 17.84       |
| <b>BRI</b>              | 17.9           | 1.5        | 10.77        | 15.7        |
| <b>BRUSSELS</b>         | 14.45          | 16.38      | 12.6         | -           |
| <b>CUBRIC</b>           | 13.56          | 12.9       | -            | -           |
| <b>EPICZ</b>            | 19             | -          | 19.49        | 17.11       |
| <b>EPIGEN</b>           | 17             | -          | 19.43        | 25.7        |
| <b>EPIGEN_1.5T</b>      | 14.7           | -          | 15.1         | 14.2        |
| <b>FLORENCE</b>         | 12.7           | 10.4       | 25           | -           |
| <b>GER_HGW</b>          | 28.1           | 28.1       | -            | -           |
| <b>IDIBAPS</b>          | 18.1           | -          | 15.4         | 18.9        |
| <b>KCL_CNS</b>          | 13.2           | 12.1       | 20.8         | -           |
| <b>KCL_CRF</b>          | 23.1           | 23.3       | -            | -           |
| <b>KUOPIO</b>           | 25             | 17.19      | -            | 23.33       |
| <b>MNI</b>              | 16.5           | -          | 18.3         | 16.1        |
| <b>NYU</b>              | 16.96          | 14.2       | 12           | 15.6        |
| <b>RMH</b>              | 28.2           | 32.3       | 25.8         | 29.2        |
| <b>EKUT_A</b>           | 17             | 14.8       | 26.8         | -           |
| <b>EKUT_B</b>           | 17.3           | 15.9       | -            | -           |
| <b>UCSD</b>             | 19.31          | -          | 15.69        | 13.14       |
| <b>UNAM</b>             | 16.25          | -          | 18.5         | 12.5        |
| <b>UNICAMP</b>          | 12.1           | 12.82      | 9.93         | 13.25       |
| <b>UNIMORE</b>          | 12.57          | 11.36      | -            | -           |
| <b>XMU</b>              | -              | 18.55      | 16.12        | 19.07       |
| <b>Weighted average</b> | <b>17.63</b>   | <b>8.4</b> | <b>15.36</b> | <b>16.6</b> |

**Supplementary Table 21.** Full meta-analytical results of the age-by-diagnosis interaction test, controlling for sex and ICV | ‘All epilepsies’ phenotype

| Structure                                                                               | Beta    | SE     | Z value | P value |
|-----------------------------------------------------------------------------------------|---------|--------|---------|---------|
| <b><i>Volume measures – subcortical regions, hippocampi, and lateral ventricles</i></b> |         |        |         |         |
| Accumbens (LH)                                                                          | -0.12   | 0.59   | -0.20   | 0.84    |
| Amygala (LH)                                                                            | 0.19    | 1.21   | 0.16    | 0.88    |
| Caudate (LH)                                                                            | -4.22   | 1.58   | -2.67   | 0.01    |
| Hippocampus (LH)                                                                        | -1.10   | 2.12   | -0.52   | 0.60    |
| Left lateral ventricle                                                                  | 23.30   | 18.61  | 1.25    | 0.21    |
| Pallidum (LH)                                                                           | -0.46   | 0.93   | -0.50   | 0.62    |
| Putamen (LH)                                                                            | -1.93   | 2.75   | -0.70   | 0.48    |
| Thalamus (LH)                                                                           | -3.49   | 3.39   | -1.03   | 0.30    |
| Accumbens (RH)                                                                          | -0.36   | 0.50   | -0.72   | 0.47    |
| Amygdala (RH)                                                                           | -0.06   | 0.97   | -0.06   | 0.95    |
| Caudate (RH)                                                                            | -3.40   | 1.68   | -2.03   | 0.04    |
| Hippocampus (RH)                                                                        | -4.96   | 2.30   | -2.16   | 0.03    |
| Right lateral ventricle                                                                 | 35.76   | 18.13  | 1.97    | 0.05    |
| Pallidum (RH)                                                                           | -0.60   | 0.76   | -0.79   | 0.43    |
| Putamen (RH)                                                                            | -4.07   | 2.97   | -1.37   | 0.17    |
| Thalamus (RH)                                                                           | -1.56   | 4.25   | -0.37   | 0.71    |
| <b><i>Thickness measures – cortical regions</i></b>                                     |         |        |         |         |
| L_bankssts                                                                              | -0.0007 | 0.0006 | -1.0670 | 0.2860  |
| L_caudalanteriorcingulate                                                               | 0.0004  | 0.0009 | 0.4353  | 0.6633  |
| L_caudalmiddlefrontal                                                                   | 0.0000  | 0.0007 | -0.0541 | 0.9568  |
| L_cuneus                                                                                | -0.0012 | 0.0008 | -1.4519 | 0.1465  |
| L_entorhinal                                                                            | -0.0009 | 0.0014 | -0.6202 | 0.5351  |
| L_frontalpole                                                                           | -0.0010 | 0.0011 | -0.8380 | 0.4020  |
| L_fusiform                                                                              | -0.0004 | 0.0005 | -0.8112 | 0.4173  |
| L_inferiorparietal                                                                      | -0.0010 | 0.0006 | -1.5997 | 0.1097  |
| L_inferiortemporal                                                                      | -0.0005 | 0.0006 | -0.8015 | 0.4228  |
| L_insula                                                                                | 0.0006  | 0.0005 | 1.0968  | 0.2727  |

|                            |         |        |         |        |
|----------------------------|---------|--------|---------|--------|
| L_isthmuscingulate         | -0.0009 | 0.0009 | -1.0466 | 0.2953 |
| L_lateraloccipital         | -0.0009 | 0.0005 | -1.8602 | 0.0629 |
| L_lateralorbitofrontal     | -0.0005 | 0.0009 | -0.6283 | 0.5298 |
| L_lingual                  | -0.0008 | 0.0004 | -1.8816 | 0.0599 |
| L_medialorbitofrontal      | -0.0006 | 0.0006 | -1.0843 | 0.2782 |
| L_middletemporal           | -0.0007 | 0.0006 | -1.1416 | 0.2536 |
| L_paracentral              | -0.0006 | 0.0006 | -1.0058 | 0.3145 |
| L parahippocampal          | -0.0008 | 0.0013 | -0.5939 | 0.5526 |
| L_parsopercularis          | -0.0005 | 0.0007 | -0.7387 | 0.4601 |
| L_parsorbitalis            | -0.0009 | 0.0008 | -1.1287 | 0.2590 |
| L_parstriangularis         | -0.0002 | 0.0008 | -0.2078 | 0.8354 |
| L_pericalcarine            | -0.0004 | 0.0005 | -0.6798 | 0.4966 |
| L_postcentral              | -0.0004 | 0.0004 | -0.9053 | 0.3653 |
| L_posteriorcingulate       | -0.0007 | 0.0006 | -1.1893 | 0.2343 |
| L_precentral               | -0.0008 | 0.0005 | -1.5999 | 0.1096 |
| L_precuneus                | -0.0010 | 0.0007 | -1.4655 | 0.1428 |
| L_rostralanteriorcingulate | 0.0002  | 0.0012 | 0.1559  | 0.8761 |
| L_rostralmiddlefrontal     | -0.0006 | 0.0008 | -0.7028 | 0.4822 |
| L_superiorfrontal          | -0.0011 | 0.0009 | -1.3072 | 0.1911 |
| L_superiorparietal         | -0.0007 | 0.0005 | -1.5084 | 0.1315 |
| L_superiortemporal         | -0.0017 | 0.0006 | -2.8763 | 0.0040 |
| L_supramarginal            | -0.0008 | 0.0005 | -1.4898 | 0.1363 |
| L_temporalpole             | -0.0022 | 0.0012 | -1.9136 | 0.0557 |
| L_transversetemporal       | -0.0009 | 0.0007 | -1.2276 | 0.2196 |
| R_bankssts                 | -0.0012 | 0.0008 | -1.4480 | 0.1476 |
| R_caudalanteriorcingulate  | -0.0005 | 0.0012 | -0.3845 | 0.7006 |
| R_caudalmiddlefrontal      | -0.0001 | 0.0007 | -0.0919 | 0.9268 |
| R_cuneus                   | -0.0016 | 0.0009 | -1.8425 | 0.0654 |
| R_entorhinal               | -0.0003 | 0.0016 | -0.2011 | 0.8406 |
| R_frontalpole              | 0.0003  | 0.0012 | 0.2506  | 0.8021 |
| R_fusiform                 | -0.0014 | 0.0005 | -2.5991 | 0.0093 |
| R_inferiorparietal         | -0.0013 | 0.0006 | -2.2270 | 0.0259 |



|                            |         |        |         |        |
|----------------------------|---------|--------|---------|--------|
| R_inferiortemporal         | -0.0010 | 0.0006 | -1.6811 | 0.0927 |
| R_insula                   | -0.0003 | 0.0006 | -0.5816 | 0.5608 |
| R_isthmuscingulate         | -0.0010 | 0.0009 | -1.0593 | 0.2895 |
| R_lateraloccipital         | -0.0015 | 0.0005 | -2.9762 | 0.0029 |
| R_lateralorbitofrontal     | -0.0005 | 0.0009 | -0.5337 | 0.5935 |
| R_lingual                  | -0.0012 | 0.0007 | -1.7948 | 0.0727 |
| R_medialorbitofrontal      | -0.0002 | 0.0006 | -0.2774 | 0.7815 |
| R_middletemporal           | -0.0013 | 0.0008 | -1.7078 | 0.0877 |
| R_paracentral              | 0.0003  | 0.0007 | 0.3688  | 0.7122 |
| R parahippocampal          | -0.0008 | 0.0010 | -0.8312 | 0.4059 |
| R_parsopercularis          | -0.0004 | 0.0008 | -0.4805 | 0.6309 |
| R_parsorbitalis            | 0.0008  | 0.0009 | 0.8364  | 0.4029 |
| R_parstriangularis         | 0.0000  | 0.0007 | 0.0442  | 0.9647 |
| R_pericalcarine            | -0.0013 | 0.0005 | -2.6732 | 0.0075 |
| R_postcentral              | -0.0005 | 0.0005 | -1.0434 | 0.2968 |
| R_posteriorcingulate       | 0.0001  | 0.0005 | 0.2492  | 0.8032 |
| R_precentral               | -0.0005 | 0.0005 | -1.1036 | 0.2698 |
| R_precuneus                | -0.0012 | 0.0008 | -1.4186 | 0.1560 |
| R_rostralanteriorcingulate | -0.0013 | 0.0008 | -1.6635 | 0.0962 |
| R_rostralmiddlefrontal     | -0.0001 | 0.0007 | -0.1245 | 0.9009 |
| R_superiorfrontal          | -0.0001 | 0.0008 | -0.1708 | 0.8643 |
| R_superiorparietal         | -0.0009 | 0.0005 | -1.8607 | 0.0628 |
| R_superiortemporal         | -0.0018 | 0.0006 | -3.1373 | 0.0017 |
| R_supramarginal            | -0.0009 | 0.0005 | -1.6960 | 0.0899 |
| R_temporalpole             | 0.0006  | 0.0016 | 0.4052  | 0.6853 |
| R_transversetemporal       | -0.0003 | 0.0008 | -0.4334 | 0.6648 |

**Abbreviations:** Beta, correlation beta; LH, left hemisphere; RH, right hemisphere. See Supplementary Table 3 for a list of cortical abbreviations. All uncorrected p-values are reported.

**Supplementary Table 22.** Full meta-analytical results of the age-by-diagnosis interaction test, controlling for sex and ICV | ‘MTLE-L’ phenotype

| Structure                                                                               | Beta    | SE     | Z value | P value |
|-----------------------------------------------------------------------------------------|---------|--------|---------|---------|
| <b><i>Volume measures – subcortical regions, hippocampi, and lateral ventricles</i></b> |         |        |         |         |
| Accumbens (LH)                                                                          | -0.003  | 0.200  | -0.014  | 0.989   |
| Amygala (LH)                                                                            | -0.473  | 0.411  | -1.152  | 0.249   |
| Caudate (LH)                                                                            | -0.002  | 0.548  | -0.004  | 0.996   |
| Hippocampus (LH)                                                                        | 0.181   | 0.678  | 0.267   | 0.790   |
| Left lateral ventricle                                                                  | -3.918  | 5.238  | -0.748  | 0.454   |
| Pallidum (LH)                                                                           | 0.065   | 0.468  | 0.138   | 0.890   |
| Putamen (LH)                                                                            | 0.053   | 1.236  | 0.043   | 0.966   |
| Thalamus (LH)                                                                           | 0.227   | 1.640  | 0.138   | 0.890   |
| Accumbens (RH)                                                                          | 0.101   | 0.282  | 0.358   | 0.721   |
| Amygdala (RH)                                                                           | -0.981  | 0.462  | -2.122  | 0.034   |
| Caudate (RH)                                                                            | -0.007  | 0.582  | -0.012  | 0.991   |
| Hippocampus (RH)                                                                        | -3.279  | 1.015  | -3.231  | 0.001   |
| Right lateral ventricle                                                                 | 1.160   | 6.230  | 0.186   | 0.852   |
| Pallidum (RH)                                                                           | 0.146   | 0.340  | 0.431   | 0.667   |
| Putamen (RH)                                                                            | -1.057  | 1.338  | -0.790  | 0.429   |
| Thalamus (RH)                                                                           | -0.857  | 1.470  | -0.583  | 0.560   |
| <b><i>Thickness measures – cortical regions</i></b>                                     |         |        |         |         |
| L_bankssts                                                                              | 0.0003  | 0.0003 | 0.8667  | 0.3861  |
| L_caudalanteriorcingulate                                                               | 0.0001  | 0.0004 | 0.3317  | 0.7401  |
| L_caudalmiddlefrontal                                                                   | 0.0002  | 0.0003 | 0.5181  | 0.6044  |
| L_cuneus                                                                                | -0.0002 | 0.0002 | -0.7885 | 0.4304  |
| L_entorhinal                                                                            | -0.0001 | 0.0006 | -0.1163 | 0.9075  |
| L_frontalpole                                                                           | -0.0003 | 0.0004 | -0.6369 | 0.5242  |
| L_fusiform                                                                              | -0.0002 | 0.0002 | -0.8211 | 0.4116  |
| L_inferiorparietal                                                                      | -0.0002 | 0.0003 | -0.6815 | 0.4955  |
| L_inferiortemporal                                                                      | -0.0004 | 0.0003 | -1.4295 | 0.1529  |
| L_insula                                                                                | 0.0003  | 0.0003 | 0.9102  | 0.3627  |

|                            |         |        |         |        |
|----------------------------|---------|--------|---------|--------|
| L_isthmuscingulate         | -0.0005 | 0.0003 | -1.6757 | 0.0938 |
| L_lateraloccipital         | -0.0002 | 0.0002 | -0.9501 | 0.3421 |
| L_lateralorbitofrontal     | 0.0000  | 0.0003 | 0.1875  | 0.8513 |
| L_lingual                  | -0.0003 | 0.0002 | -1.2107 | 0.2260 |
| L_medialorbitofrontal      | -0.0001 | 0.0003 | -0.2065 | 0.8364 |
| L_middletemporal           | -0.0001 | 0.0003 | -0.2166 | 0.8286 |
| L_paracentral              | -0.0001 | 0.0003 | -0.2218 | 0.8245 |
| L parahippocampal          | 0.0005  | 0.0005 | 0.9967  | 0.3189 |
| L_parsopercularis          | -0.0001 | 0.0002 | -0.2841 | 0.7764 |
| L_parsorbitalis            | 0.0002  | 0.0004 | 0.4582  | 0.6468 |
| L_parstriangularis         | 0.0000  | 0.0003 | 0.0287  | 0.9771 |
| L_pericalcarine            | -0.0001 | 0.0003 | -0.2011 | 0.8406 |
| L_postcentral              | -0.0002 | 0.0002 | -1.0703 | 0.2845 |
| L_posteriorcingulate       | -0.0001 | 0.0005 | -0.2835 | 0.7768 |
| L_precentral               | -0.0001 | 0.0002 | -0.5226 | 0.6013 |
| L_precuneus                | 0.0000  | 0.0003 | -0.1068 | 0.9150 |
| L_rostralanteriorcingulate | 0.0006  | 0.0004 | 1.3229  | 0.1859 |
| L_rostralmiddlefrontal     | 0.0000  | 0.0002 | -0.0316 | 0.9748 |
| L_superiorfrontal          | -0.0002 | 0.0002 | -1.0477 | 0.2948 |
| L_superiorparietal         | -0.0001 | 0.0002 | -0.7245 | 0.4687 |
| L_superiortemporal         | -0.0005 | 0.0003 | -1.9950 | 0.0460 |
| L_supramarginal            | -0.0002 | 0.0002 | -1.0924 | 0.2747 |
| L_temporalpole             | -0.0009 | 0.0006 | -1.5518 | 0.1207 |
| L_transversetemporal       | -0.0005 | 0.0003 | -1.4167 | 0.1566 |
| R_bankssts                 | 0.0000  | 0.0004 | -0.0835 | 0.9335 |
| R_caudalanteriorcingulate  | 0.0000  | 0.0004 | -0.0706 | 0.9437 |
| R_caudalmiddlefrontal      | -0.0001 | 0.0002 | -0.5055 | 0.6132 |
| R_cuneus                   | -0.0001 | 0.0002 | -0.6384 | 0.5232 |
| R_entorhinal               | -0.0010 | 0.0006 | -1.6935 | 0.0904 |
| R_frontalpole              | -0.0004 | 0.0005 | -0.9201 | 0.3575 |
| R_fusiform                 | -0.0005 | 0.0003 | -1.4755 | 0.1401 |

|                            |         |        |         |        |
|----------------------------|---------|--------|---------|--------|
| R_inferiorparietal         | -0.0002 | 0.0003 | -0.7756 | 0.4380 |
| R_inferiortemporal         | -0.0004 | 0.0003 | -1.4009 | 0.1613 |
| R_insula                   | -0.0001 | 0.0003 | -0.5158 | 0.6060 |
| R_isthmuscingulate         | 0.0000  | 0.0003 | 0.0478  | 0.9618 |
| R_lateraloccipital         | -0.0005 | 0.0002 | -2.1323 | 0.0330 |
| R_lateralorbitofrontal     | 0.0001  | 0.0002 | 0.2913  | 0.7708 |
| R_lingual                  | -0.0004 | 0.0002 | -1.6963 | 0.0898 |
| R_medialorbitofrontal      | 0.0000  | 0.0003 | 0.0407  | 0.9676 |
| R_middletemporal           | -0.0002 | 0.0003 | -0.6998 | 0.4841 |
| R_paracentral              | 0.0003  | 0.0002 | 1.0670  | 0.2860 |
| R parahippocampal          | 0.0000  | 0.0004 | -0.0809 | 0.9355 |
| R_parsopercularis          | -0.0001 | 0.0002 | -0.5454 | 0.5855 |
| R_parsorbitalis            | 0.0007  | 0.0003 | 2.0445  | 0.0409 |
| R_parstriangularis         | 0.0002  | 0.0002 | 0.7253  | 0.4683 |
| R_pericalcarine            | 0.0001  | 0.0003 | 0.2538  | 0.7996 |
| R_postcentral              | 0.0000  | 0.0002 | -0.1008 | 0.9197 |
| R_posteriorcingulate       | 0.0000  | 0.0002 | 0.0283  | 0.9774 |
| R_precentral               | 0.0000  | 0.0002 | 0.0013  | 0.9989 |
| R_precuneus                | -0.0001 | 0.0002 | -0.2282 | 0.8195 |
| R_rostralanteriorcingulate | -0.0004 | 0.0004 | -0.9708 | 0.3317 |
| R_rostralmiddlefrontal     | 0.0001  | 0.0002 | 0.2877  | 0.7736 |
| R_superiorfrontal          | -0.0001 | 0.0002 | -0.4660 | 0.6412 |
| R_superiorparietal         | -0.0002 | 0.0002 | -0.9406 | 0.3469 |
| R_superiortemporal         | -0.0004 | 0.0003 | -1.7037 | 0.0884 |
| R_supramarginal            | -0.0002 | 0.0002 | -1.0248 | 0.3055 |
| R_temporalpole             | -0.0001 | 0.0006 | -0.2610 | 0.7941 |
| R_transversetemporal       | -0.0001 | 0.0004 | -0.2853 | 0.7754 |

**Abbreviations:** Beta, correlation beta; LH, left hemisphere; RH, right hemisphere. See Supplementary Table 3 for a list of cortical abbreviations. All uncorrected p-values are reported.

**Supplementary Table 23.** Full meta-analytical results of the age-by-diagnosis interaction test, controlling for sex and ICV | 'MTLE-R' phenotype

| Structure                                                                               | Beta    | SE     | Z value | P value |
|-----------------------------------------------------------------------------------------|---------|--------|---------|---------|
| <b><i>Volume measures – subcortical regions, hippocampi, and lateral ventricles</i></b> |         |        |         |         |
| Accumbens (LH)                                                                          | -0.046  | 0.0003 | 0.7633  | 0.828   |
| Amygala (LH)                                                                            | -0.380  | 0.0004 | 0.6991  | 0.367   |
| Caudate (LH)                                                                            | -0.249  | 0.0003 | -0.0197 | 0.672   |
| Hippocampus (LH)                                                                        | 0.003   | 0.0002 | -0.9810 | 0.997   |
| Left lateral ventricle                                                                  | -4.437  | 0.0006 | 0.3237  | 0.405   |
| Pallidum (LH)                                                                           | -0.368  | 0.0004 | -0.6924 | 0.416   |
| Putamen (LH)                                                                            | -0.312  | 0.0002 | -0.8290 | 0.808   |
| Thalamus (LH)                                                                           | 0.659   | 0.0003 | -0.5496 | 0.675   |
| Accumbens (RH)                                                                          | 0.079   | 0.0003 | -1.3410 | 0.794   |
| Amygdala (RH)                                                                           | -0.864  | 0.0003 | 0.6052  | 0.050   |
| Caudate (RH)                                                                            | -0.316  | 0.0003 | -1.4816 | 0.607   |
| Hippocampus (RH)                                                                        | -3.832  | 0.0003 | -1.3226 | 0.001   |
| Right lateral ventricle                                                                 | 1.200   | 0.0002 | 0.5318  | 0.856   |
| Pallidum (RH)                                                                           | 0.028   | 0.0002 | -1.7378 | 0.940   |
| Putamen (RH)                                                                            | -0.651  | 0.0003 | -0.5819 | 0.649   |
| Thalamus (RH)                                                                           | -1.180  | 0.0003 | 0.0761  | 0.438   |
| <b><i>Thickness measures – cortical regions</i></b>                                     |         |        |         |         |
| L_bankssts                                                                              | 0.0002  | 0.0003 | 0.7633  | 0.4453  |
| L_caudalanteriorcingulate                                                               | 0.0003  | 0.0004 | 0.6991  | 0.4845  |
| L_caudalmiddlefrontal                                                                   | 0.0000  | 0.0003 | -0.0197 | 0.9843  |
| L_cuneus                                                                                | -0.0002 | 0.0002 | -0.9810 | 0.3266  |
| L_entorhinal                                                                            | 0.0002  | 0.0006 | 0.3237  | 0.7462  |
| L_frontalpole                                                                           | -0.0003 | 0.0004 | -0.6924 | 0.4887  |
| L_fusiform                                                                              | -0.0002 | 0.0002 | -0.8290 | 0.4071  |
| L_inferiorparietal                                                                      | -0.0002 | 0.0003 | -0.5496 | 0.5826  |
| L_inferiortemporal                                                                      | -0.0003 | 0.0003 | -1.3410 | 0.1799  |

|                            |         |        |         |        |
|----------------------------|---------|--------|---------|--------|
| L_insula                   | 0.0002  | 0.0003 | 0.6052  | 0.5450 |
| L_isthmuscingulate         | -0.0004 | 0.0003 | -1.4816 | 0.1384 |
| L_lateraloccipital         | -0.0003 | 0.0003 | -1.3226 | 0.1860 |
| L_lateralorbitofrontal     | 0.0001  | 0.0002 | 0.5318  | 0.5949 |
| L_lingual                  | -0.0004 | 0.0002 | -1.7378 | 0.0822 |
| L_medialorbitofrontal      | -0.0002 | 0.0003 | -0.5819 | 0.5607 |
| L_middletemporal           | 0.0000  | 0.0003 | 0.0761  | 0.9393 |
| L_paracentral              | -0.0004 | 0.0003 | -1.2808 | 0.2003 |
| L parahippocampal          | 0.0000  | 0.0006 | -0.0492 | 0.9608 |
| L_parsopercularis          | 0.0000  | 0.0002 | 0.1866  | 0.8519 |
| L_parsorbitalis            | 0.0002  | 0.0003 | 0.5061  | 0.6128 |
| L_parstriangularis         | 0.0000  | 0.0002 | -0.0660 | 0.9474 |
| L_pericalcarine            | -0.0001 | 0.0003 | -0.4468 | 0.6550 |
| L_postcentral              | -0.0003 | 0.0002 | -1.5272 | 0.1267 |
| L_posteriorcingulate       | -0.0002 | 0.0003 | -0.7550 | 0.4502 |
| L_precentral               | -0.0003 | 0.0002 | -1.2943 | 0.1956 |
| L_precuneus                | -0.0001 | 0.0003 | -0.4288 | 0.6680 |
| L_rostralanteriorcingulate | 0.0003  | 0.0003 | 0.8872  | 0.3750 |
| L_rostralmiddlefrontal     | 0.0000  | 0.0002 | 0.1929  | 0.8470 |
| L_superiorfrontal          | -0.0003 | 0.0002 | -1.1611 | 0.2456 |
| L_superiorparietal         | -0.0002 | 0.0003 | -0.9564 | 0.3389 |
| L_superiortemporal         | -0.0004 | 0.0002 | -1.6722 | 0.0945 |
| L_supramarginal            | -0.0003 | 0.0002 | -1.5041 | 0.1326 |
| L_temporalpole             | -0.0005 | 0.0005 | -1.0227 | 0.3064 |
| L_transversetemporal       | -0.0007 | 0.0003 | -2.0131 | 0.0441 |
| R_bankssts                 | 0.0001  | 0.0005 | 0.1137  | 0.9095 |
| R_caudalanteriorcingulate  | 0.0002  | 0.0003 | 0.4753  | 0.6345 |
| R_caudalmiddlefrontal      | -0.0002 | 0.0002 | -0.6924 | 0.4887 |
| R_cuneus                   | -0.0003 | 0.0002 | -1.3833 | 0.1666 |
| R_entorhinal               | -0.0005 | 0.0006 | -0.8789 | 0.3795 |
| R_frontalpole              | -0.0003 | 0.0005 | -0.6569 | 0.5112 |

|                            |         |        |         |        |
|----------------------------|---------|--------|---------|--------|
| R_fusiform                 | -0.0003 | 0.0002 | -1.4418 | 0.1494 |
| R_inferiorparietal         | -0.0002 | 0.0003 | -0.8202 | 0.4121 |
| R_inferiortemporal         | -0.0004 | 0.0003 | -1.1445 | 0.2524 |
| R_insula                   | -0.0001 | 0.0002 | -0.3243 | 0.7457 |
| R_isthmuscingulate         | 0.0000  | 0.0003 | -0.1398 | 0.8888 |
| R_lateraloccipital         | -0.0005 | 0.0002 | -2.5310 | 0.0114 |
| R_lateralorbitofrontal     | 0.0003  | 0.0002 | 1.0486  | 0.2943 |
| R_lingual                  | -0.0004 | 0.0002 | -1.7020 | 0.0887 |
| R_medialorbitofrontal      | 0.0000  | 0.0003 | 0.0192  | 0.9847 |
| R_middletemporal           | -0.0002 | 0.0003 | -0.6148 | 0.5387 |
| R_paracentral              | 0.0001  | 0.0002 | 0.4298  | 0.6673 |
| R parahippocampal          | -0.0002 | 0.0004 | -0.3614 | 0.7178 |
| R_parsopercularis          | -0.0002 | 0.0002 | -0.7761 | 0.4377 |
| R_parsorbitalis            | 0.0008  | 0.0003 | 2.2921  | 0.0219 |
| R_parstriangularis         | 0.0002  | 0.0002 | 0.9915  | 0.3214 |
| R_pericalcarine            | -0.0002 | 0.0003 | -0.8538 | 0.3932 |
| R_postcentral              | -0.0002 | 0.0002 | -0.9812 | 0.3265 |
| R_posteriorcingulate       | 0.0001  | 0.0002 | 0.2580  | 0.7964 |
| R_precentral               | -0.0002 | 0.0002 | -0.7935 | 0.4275 |
| R_precuneus                | -0.0002 | 0.0002 | -0.6426 | 0.5205 |
| R_rostralanteriorcingulate | -0.0002 | 0.0004 | -0.4953 | 0.6204 |
| R_rostralmiddlefrontal     | 0.0001  | 0.0002 | 0.3287  | 0.7424 |
| R_superiorfrontal          | -0.0002 | 0.0002 | -0.7724 | 0.4399 |
| R_superiorparietal         | -0.0003 | 0.0002 | -1.3505 | 0.1769 |
| R_superiortemporal         | -0.0005 | 0.0002 | -1.9055 | 0.0567 |
| R_supramarginal            | -0.0004 | 0.0002 | -1.7222 | 0.0850 |
| R_temporalpole             | -0.0003 | 0.0005 | -0.5144 | 0.6070 |
| R_transversetemporal       | -0.0001 | 0.0003 | -0.3257 | 0.7446 |

**Abbreviations:** Beta, correlation beta; SE, standard error; LH, left hemisphere; RH, right hemisphere. See Supplementary Table 3 for a list of cortical abbreviations. All uncorrected p-values are reported.

**Supplementary Table 24.** Full meta-analytical results of the age-by-diagnosis interaction test, controlling for sex and ICV | '1GE' phenotype

| Structure                                                                               | Beta     | SE     | Z value | P value |
|-----------------------------------------------------------------------------------------|----------|--------|---------|---------|
| <b><i>Volume measures – subcortical regions, hippocampi, and lateral ventricles</i></b> |          |        |         |         |
| Accumbens (LH)                                                                          | 0.048    | 0.200  | 0.241   | 0.809   |
| Amygala (LH)                                                                            | -0.105   | 0.560  | -0.187  | 0.852   |
| Caudate (LH)                                                                            | -0.852   | 0.972  | -0.877  | 0.380   |
| Hippocampus (LH)                                                                        | 0.174    | 0.972  | 0.179   | 0.858   |
| Left lateral ventricle                                                                  | -1.083   | 11.764 | -0.092  | 0.927   |
| Pallidum (LH)                                                                           | 0.761    | 0.584  | 1.301   | 0.193   |
| Putamen (LH)                                                                            | 1.412    | 1.507  | 0.937   | 0.349   |
| Thalamus (LH)                                                                           | 1.907    | 2.044  | 0.933   | 0.351   |
| Accumbens (RH)                                                                          | 0.260    | 0.374  | 0.695   | 0.487   |
| Amygdala (RH)                                                                           | -0.855   | 0.815  | -1.049  | 0.294   |
| Caudate (RH)                                                                            | -0.264   | 1.070  | -0.247  | 0.805   |
| Hippocampus (RH)                                                                        | -3.250   | 1.571  | -2.068  | 0.039   |
| Right lateral ventricle                                                                 | 7.740    | 14.339 | 0.540   | 0.589   |
| Pallidum (RH)                                                                           | 0.511    | 0.311  | 1.640   | 0.101   |
| Putamen (RH)                                                                            | -0.076   | 1.908  | -0.040  | 0.968   |
| Thalamus (RH)                                                                           | 1.186    | 1.543  | 0.769   | 0.442   |
| <b><i>Thickness measures – cortical regions</i></b>                                     |          |        |         |         |
| L_bankssts                                                                              | 0.00072  | 0.0003 | 2.2867  | 0.0222  |
| L_caudalanteriorcingulate                                                               | -0.00021 | 0.0006 | -0.3419 | 0.7324  |
| L_caudalmiddlefrontal                                                                   | 0.00021  | 0.0004 | 0.5335  | 0.5937  |
| L_cuneus                                                                                | 0.00005  | 0.0002 | 0.2098  | 0.8338  |
| L_entorhinal                                                                            | -0.00115 | 0.0008 | -1.5244 | 0.1274  |
| L_frontalpole                                                                           | 0.00047  | 0.0006 | 0.8272  | 0.4081  |
| L_fusiform                                                                              | 0.00025  | 0.0003 | 0.9777  | 0.3282  |
| L_inferiorparietal                                                                      | 0.00002  | 0.0003 | 0.0469  | 0.9626  |
| L_inferiortemporal                                                                      | 0.00012  | 0.0004 | 0.3419  | 0.7324  |



|                            |          |        |         |        |
|----------------------------|----------|--------|---------|--------|
| L_insula                   | 0.00057  | 0.0003 | 1.7032  | 0.0885 |
| L_isthmuscingulate         | -0.00016 | 0.0005 | -0.3358 | 0.7370 |
| L_lateraloccipital         | 0.00000  | 0.0002 | -0.0104 | 0.9917 |
| L_lateralorbitofrontal     | -0.00057 | 0.0006 | -0.9499 | 0.3422 |
| L_lingual                  | 0.00016  | 0.0002 | 0.7707  | 0.4409 |
| L_medialorbitofrontal      | -0.00007 | 0.0003 | -0.2326 | 0.8160 |
| L_middletemporal           | -0.00010 | 0.0005 | -0.2019 | 0.8400 |
| L_paracentral              | -0.00001 | 0.0004 | -0.0147 | 0.9883 |
| L parahippocampal          | -0.00005 | 0.0011 | -0.0508 | 0.9595 |
| L_parsopercularis          | -0.00014 | 0.0005 | -0.2676 | 0.7890 |
| L_parsorbitalis            | -0.00002 | 0.0007 | -0.0300 | 0.9761 |
| L_parstriangularis         | -0.00050 | 0.0010 | -0.4935 | 0.6216 |
| L_pericalcarine            | 0.00040  | 0.0002 | 1.8455  | 0.0650 |
| L_postcentral              | 0.00004  | 0.0003 | 0.1239  | 0.9014 |
| L_posteriorcingulate       | -0.00007 | 0.0005 | -0.1353 | 0.8924 |
| L_precentral               | 0.00004  | 0.0002 | 0.1661  | 0.8681 |
| L_precuneus                | 0.00008  | 0.0004 | 0.2013  | 0.8405 |
| L_rostralanteriorcingulate | 0.00003  | 0.0005 | 0.0614  | 0.9511 |
| L_rostralmiddlefrontal     | -0.00031 | 0.0007 | -0.4516 | 0.6516 |
| L_superiorfrontal          | -0.00068 | 0.0007 | -0.9755 | 0.3293 |
| L_superiorparietal         | 0.00034  | 0.0002 | 1.6793  | 0.0931 |
| L_superiortemporal         | -0.00028 | 0.0003 | -0.9662 | 0.3339 |
| L_supramarginal            | 0.00011  | 0.0004 | 0.2764  | 0.7822 |
| L_temporalpole             | -0.00047 | 0.0006 | -0.8352 | 0.4036 |
| L_transversetemporal       | -0.00037 | 0.0005 | -0.7720 | 0.4401 |
| R_bankssts                 | 0.00007  | 0.0006 | 0.1080  | 0.9140 |
| R_caudalanteriorcingulate  | -0.00021 | 0.0007 | -0.2760 | 0.7826 |
| R_caudalmiddlefrontal      | 0.00004  | 0.0005 | 0.0649  | 0.9482 |
| R_cuneus                   | 0.00020  | 0.0002 | 0.8398  | 0.4010 |
| R_entorhinal               | -0.00157 | 0.0009 | -1.8424 | 0.0654 |
| R_frontalpole              | 0.00042  | 0.0007 | 0.6095  | 0.5422 |

|                            |          |        |         |        |
|----------------------------|----------|--------|---------|--------|
| R_fusiform                 | -0.00073 | 0.0004 | -1.7767 | 0.0756 |
| R_inferiorparietal         | -0.00015 | 0.0003 | -0.5601 | 0.5754 |
| R_inferiortemporal         | -0.00042 | 0.0005 | -0.7803 | 0.4352 |
| R_insula                   | 0.00022  | 0.0003 | 0.7864  | 0.4317 |
| R_isthmuscingulate         | 0.00021  | 0.0003 | 0.6040  | 0.5458 |
| R_lateraloccipital         | -0.00039 | 0.0004 | -1.1210 | 0.2623 |
| R_lateralorbitofrontal     | 0.00004  | 0.0004 | 0.1003  | 0.9201 |
| R_lingual                  | -0.00004 | 0.0002 | -0.2011 | 0.8406 |
| R_medialorbitofrontal      | -0.00016 | 0.0004 | -0.4392 | 0.6605 |
| R_middletemporal           | -0.00039 | 0.0005 | -0.8528 | 0.3937 |
| R_paracentral              | 0.00040  | 0.0003 | 1.5586  | 0.1191 |
| R parahippocampal          | -0.00055 | 0.0006 | -0.9803 | 0.3269 |
| R_parsopercularis          | -0.00009 | 0.0003 | -0.3072 | 0.7587 |
| R_parsorbitalis            | 0.00069  | 0.0004 | 1.6965  | 0.0898 |
| R_parstriangularis         | -0.00008 | 0.0006 | -0.1352 | 0.8925 |
| R_pericalcarine            | 0.00034  | 0.0004 | 0.8546  | 0.3928 |
| R_postcentral              | 0.00023  | 0.0002 | 1.0178  | 0.3088 |
| R_posteriorcingulate       | 0.00024  | 0.0003 | 0.8505  | 0.3951 |
| R_precentral               | 0.00005  | 0.0002 | 0.2252  | 0.8218 |
| R_precuneus                | 0.00013  | 0.0002 | 0.5829  | 0.5600 |
| R_rostralanteriorcingulate | -0.00065 | 0.0005 | -1.1865 | 0.2354 |
| R_rostralmiddlefrontal     | -0.00003 | 0.0004 | -0.0742 | 0.9408 |
| R_superiorfrontal          | 0.00001  | 0.0004 | 0.0373  | 0.9703 |
| R_superiorparietal         | -0.00004 | 0.0002 | -0.1895 | 0.8497 |
| R_superiortemporal         | -0.00068 | 0.0003 | -2.3695 | 0.0178 |
| R_supramarginal            | -0.00023 | 0.0004 | -0.5600 | 0.5755 |
| R_temporalpole             | -0.00054 | 0.0010 | -0.5589 | 0.5762 |
| R_transversetemporal       | -0.00004 | 0.0005 | -0.0877 | 0.9302 |

**Abbreviations:** Beta, correlation beta; SE, standard error; LH, left hemisphere; RH, right hemisphere. See Supplementary Table 3 for a list of cortical abbreviations. All uncorrected p-values are reported.

**Supplementary Table 25.** Full meta-analytical results of the age-by-diagnosis interaction test, controlling for sex and ICV | ‘All other epilepsies’

| Structure                                                                               | Beta    | SE     | Z value | P value |
|-----------------------------------------------------------------------------------------|---------|--------|---------|---------|
| <b><i>Volume measures – subcortical regions, hippocampi, and lateral ventricles</i></b> |         |        |         |         |
| Accumbens (LH)                                                                          | 0.07    | 0.18   | 0.37    | 0.71    |
| Amygala (LH)                                                                            | -0.71   | 0.44   | -1.59   | 0.11    |
| Caudate (LH)                                                                            | -0.30   | 0.74   | -0.40   | 0.69    |
| Hippocampus (LH)                                                                        | -0.82   | 0.85   | -0.97   | 0.33    |
| Left lateral ventricle                                                                  | -6.47   | 6.34   | -1.02   | 0.31    |
| Pallidum (LH)                                                                           | 0.10    | 0.47   | 0.22    | 0.82    |
| Putamen (LH)                                                                            | 0.25    | 1.41   | 0.18    | 0.86    |
| Thalamus (LH)                                                                           | -0.43   | 2.19   | -0.20   | 0.84    |
| Accumbens (RH)                                                                          | 0.14    | 0.34   | 0.42    | 0.68    |
| Amygdala (RH)                                                                           | -1.27   | 0.55   | -2.32   | 0.02    |
| Caudate (RH)                                                                            | 0.16    | 0.64   | 0.26    | 0.80    |
| Hippocampus (RH)                                                                        | -4.00   | 1.30   | -3.07   | 0.00    |
| Right lateral ventricle                                                                 | -0.16   | 7.80   | -0.02   | 0.98    |
| Pallidum (RH)                                                                           | 0.22    | 0.27   | 0.80    | 0.43    |
| Putamen (RH)                                                                            | -0.66   | 1.54   | -0.43   | 0.67    |
| Thalamus (RH)                                                                           | -0.37   | 1.51   | -0.25   | 0.81    |
| <b><i>Thickness measures – cortical regions</i></b>                                     |         |        |         |         |
| L_bankssts                                                                              | -0.0007 | 0.0006 | -1.0670 | 0.2860  |
| L_caudalanteriorcingulate                                                               | 0.0004  | 0.0009 | 0.4353  | 0.6633  |
| L_caudalmiddlefrontal                                                                   | 0.0000  | 0.0007 | -0.0541 | 0.9568  |
| L_cuneus                                                                                | -0.0012 | 0.0008 | -1.4519 | 0.1465  |
| L_entorhinal                                                                            | -0.0009 | 0.0014 | -0.6202 | 0.5351  |
| L_frontalpole                                                                           | -0.0010 | 0.0011 | -0.8380 | 0.4020  |
| L_fusiform                                                                              | -0.0004 | 0.0005 | -0.8112 | 0.4173  |
| L_inferiorparietal                                                                      | -0.0010 | 0.0006 | -1.5997 | 0.1097  |
| L_inferiortemporal                                                                      | -0.0005 | 0.0006 | -0.8015 | 0.4228  |
| L_insula                                                                                | 0.0006  | 0.0005 | 1.0968  | 0.2727  |
| L_isthmuscingulate                                                                      | -0.0009 | 0.0009 | -1.0466 | 0.2953  |

|                            |         |        |         |        |
|----------------------------|---------|--------|---------|--------|
| L_lateraloccipital         | -0.0009 | 0.0005 | -1.8602 | 0.0629 |
| L_lateralorbitofrontal     | -0.0005 | 0.0009 | -0.6283 | 0.5298 |
| L_lingual                  | -0.0008 | 0.0004 | -1.8816 | 0.0599 |
| L_medialorbitofrontal      | -0.0006 | 0.0006 | -1.0843 | 0.2782 |
| L_middletemporal           | -0.0007 | 0.0006 | -1.1416 | 0.2536 |
| L_paracentral              | -0.0006 | 0.0006 | -1.0058 | 0.3145 |
| L parahippocampal          | -0.0008 | 0.0013 | -0.5939 | 0.5526 |
| L_parsopercularis          | -0.0005 | 0.0007 | -0.7387 | 0.4601 |
| L_parsorbitalis            | -0.0009 | 0.0008 | -1.1287 | 0.2590 |
| L_parstriangularis         | -0.0002 | 0.0008 | -0.2078 | 0.8354 |
| L_pericalcarine            | -0.0004 | 0.0005 | -0.6798 | 0.4966 |
| L_postcentral              | -0.0004 | 0.0004 | -0.9053 | 0.3653 |
| L_posteriorcingulate       | -0.0007 | 0.0006 | -1.1893 | 0.2343 |
| L_precentral               | -0.0008 | 0.0005 | -1.5999 | 0.1096 |
| L_precuneus                | -0.0010 | 0.0007 | -1.4655 | 0.1428 |
| L_rostralanteriorcingulate | 0.0002  | 0.0012 | 0.1559  | 0.8761 |
| L_rostralmiddlefrontal     | -0.0006 | 0.0008 | -0.7028 | 0.4822 |
| L_superiorfrontal          | -0.0011 | 0.0009 | -1.3072 | 0.1911 |
| L_superiorparietal         | -0.0007 | 0.0005 | -1.5084 | 0.1315 |
| L_superiortemporal         | -0.0017 | 0.0006 | -2.8763 | 0.0040 |
| L_supramarginal            | -0.0008 | 0.0005 | -1.4898 | 0.1363 |
| L_temporalpole             | -0.0022 | 0.0012 | -1.9136 | 0.0557 |
| L_transversetemporal       | -0.0009 | 0.0007 | -1.2276 | 0.2196 |
| R_bankssts                 | -0.0012 | 0.0008 | -1.4480 | 0.1476 |
| R_caudalanteriorcingulate  | -0.0005 | 0.0012 | -0.3845 | 0.7006 |
| R_caudalmiddlefrontal      | -0.0001 | 0.0007 | -0.0919 | 0.9268 |
| R_cuneus                   | -0.0016 | 0.0009 | -1.8425 | 0.0654 |
| R_entorhinal               | -0.0003 | 0.0016 | -0.2011 | 0.8406 |
| R_frontalpole              | 0.0003  | 0.0012 | 0.2506  | 0.8021 |
| R_fusiform                 | -0.0014 | 0.0005 | -2.5991 | 0.0093 |
| R_inferiorparietal         | -0.0013 | 0.0006 | -2.2270 | 0.0259 |
| R_inferiortemporal         | -0.0010 | 0.0006 | -1.6811 | 0.0927 |

|                            |         |        |         |        |
|----------------------------|---------|--------|---------|--------|
| R_insula                   | -0.0003 | 0.0006 | -0.5816 | 0.5608 |
| R_isthmuscingulate         | -0.0010 | 0.0009 | -1.0593 | 0.2895 |
| R_lateraloccipital         | -0.0015 | 0.0005 | -2.9762 | 0.0029 |
| R_lateralorbitofrontal     | -0.0005 | 0.0009 | -0.5337 | 0.5935 |
| R_lingual                  | -0.0012 | 0.0007 | -1.7948 | 0.0727 |
| R_medialorbitofrontal      | -0.0002 | 0.0006 | -0.2774 | 0.7815 |
| R_middletemporal           | -0.0013 | 0.0008 | -1.7078 | 0.0877 |
| R_paracentral              | 0.0003  | 0.0007 | 0.3688  | 0.7122 |
| R parahippocampal          | -0.0008 | 0.0010 | -0.8312 | 0.4059 |
| R_parsopercularis          | -0.0004 | 0.0008 | -0.4805 | 0.6309 |
| R_parsorbitalis            | 0.0008  | 0.0009 | 0.8364  | 0.4029 |
| R_parstriangularis         | 0.0000  | 0.0007 | 0.0442  | 0.9647 |
| R_pericalcarine            | -0.0013 | 0.0005 | -2.6732 | 0.0075 |
| R_postcentral              | -0.0005 | 0.0005 | -1.0434 | 0.2968 |
| R_posteriorcingulate       | 0.0001  | 0.0005 | 0.2492  | 0.8032 |
| R_precentral               | -0.0005 | 0.0005 | -1.1036 | 0.2698 |
| R_precuneus                | -0.0012 | 0.0008 | -1.4186 | 0.1560 |
| R_rostralanteriorcingulate | -0.0013 | 0.0008 | -1.6635 | 0.0962 |
| R_rostralmiddlefrontal     | -0.0001 | 0.0007 | -0.1245 | 0.9009 |
| R_superiorfrontal          | -0.0001 | 0.0008 | -0.1708 | 0.8643 |
| R_superiorparietal         | -0.0009 | 0.0005 | -1.8607 | 0.0628 |
| R_superiortemporal         | -0.0018 | 0.0006 | -3.1373 | 0.0017 |
| R_supramarginal            | -0.0009 | 0.0005 | -1.6960 | 0.0899 |
| R_temporalpole             | 0.0006  | 0.0016 | 0.4052  | 0.6853 |
| R_transversetemporal       | -0.0003 | 0.0008 | -0.4334 | 0.6648 |

**Abbreviations:** Beta, correlation beta; LH, left hemisphere; RH, right hemisphere. See Supplementary Table 3 for a list of cortical abbreviations. All uncorrected p-values are reported.

**Supplementary Table 26.** Full list of case-versus-control effect sizes for subcortical volume differences, including non-significant findings | ‘All epilepsies’ phenotype

| Structure                       | Cohen's <i>d</i> | SE          | Z score      | 95% CI               | <i>P</i> value               | FDR-adjusted <i>P</i> value  | <i>I</i> <sup>2</sup> | Number of controls | Number of cases |
|---------------------------------|------------------|-------------|--------------|----------------------|------------------------------|------------------------------|-----------------------|--------------------|-----------------|
| <b>Thalamus (RH)*</b>           | <b>-0.37</b>     | <b>0.05</b> | <b>-7.48</b> | <b>-0.46 - -0.27</b> | <b>7.67x10<sup>-14</sup></b> | <b>1.29X10<sup>-12</sup></b> | <b>44.82</b>          | <b>1716</b>        | <b>2137</b>     |
| <b>Thalamus (LH)*</b>           | <b>-0.36</b>     | <b>0.07</b> | <b>-4.84</b> | <b>-0.5 - -0.21</b>  | <b>1.31x10<sup>-6</sup></b>  | <b>6.88X10<sup>-6</sup></b>  | <b>75.65</b>          | <b>1687</b>        | <b>2104</b>     |
| <b>Hippocampus (LH)*</b>        | <b>-0.35</b>     | <b>0.07</b> | <b>-5.12</b> | <b>-0.49 - -0.22</b> | <b>3.04x10<sup>-7</sup></b>  | <b>1.82X10<sup>-6</sup></b>  | <b>71.84</b>          | <b>1707</b>        | <b>2125</b>     |
| <b>Hippocampus (RH)*</b>        | <b>-0.34</b>     | <b>0.05</b> | <b>-6.17</b> | <b>-0.44 - -0.23</b> | <b>6.63x10<sup>-10</sup></b> | <b>7.96X10<sup>-9</sup></b>  | <b>54.80</b>          | <b>1719</b>        | <b>2129</b>     |
| <b>Pallidum (RH)*</b>           | <b>-0.32</b>     | <b>0.05</b> | <b>-5.76</b> | <b>-0.42 - -0.21</b> | <b>8.32x10<sup>-9</sup></b>  | <b>6.99X10<sup>-8</sup></b>  | <b>55.58</b>          | <b>1710</b>        | <b>2112</b>     |
| <b>Putamen (LH)*</b>            | <b>-0.25</b>     | <b>0.06</b> | <b>-3.94</b> | <b>-0.37 - -0.12</b> | <b>8.30x10<sup>-5</sup></b>  | <b>2.91X10<sup>-4</sup></b>  | <b>65.34</b>          | <b>1636</b>        | <b>2075</b>     |
| Putamen (RH)                    | -0.24            | 0.08        | -3.17        | -0.39 - -0.09        | 1.53x10 <sup>-3</sup>        | <b>3.89X10<sup>-3</sup></b>  | 76.74                 | 1690               | 2127            |
| Pallidum (LH)                   | -0.17            | 0.08        | -2.11        | -0.33 - -0.01        | 3.53x10 <sup>-2</sup>        | 5.47X10 <sup>-2</sup>        | 79.55                 | 1609               | 1991            |
| Caudate (LH)                    | -0.12            | 0.05        | -2.42        | -0.22 - -0.02        | 1.56x10 <sup>-2</sup>        | 2.79X10 <sup>-2</sup>        | 47.69                 | 1724               | 2135            |
| Caudate (RH)                    | -0.08            | 0.05        | -1.49        | -0.19 - 0.03         | 1.36x10 <sup>-1</sup>        | 1.74X10 <sup>-1</sup>        | 54.70                 | 1725               | 2137            |
| Accumbens (RH)                  | -0.06            | 0.09        | -0.68        | -0.25 - 0.12         | 4.94x10 <sup>-1</sup>        | 5.39X10 <sup>-1</sup>        | 85.16                 | 1702               | 2137            |
| Accumbens (LH)                  | -0.02            | 0.08        | -0.21        | -0.17 - 0.14         | 8.33x10 <sup>-1</sup>        | 8.54X10 <sup>-1</sup>        | 79.23                 | 1707               | 2136            |
| Amygdala (LH)                   | 0.10             | 0.07        | 1.45         | -0.04 - 0.24         | 1.47x10 <sup>-1</sup>        | 1.79X10 <sup>-1</sup>        | 73.59                 | 1717               | 2124            |
| Amygdala (RH)                   | 0.11             | 0.06        | 1.83         | -0.01 - 0.23         | 6.76x10 <sup>-2</sup>        | 9.62X10 <sup>-2</sup>        | 63.44                 | 1693               | 2108            |
| <b>Right lateral ventricle*</b> | <b>0.27</b>      | <b>0.03</b> | <b>7.86</b>  | <b>0.2 - 0.33</b>    | <b>3.73x10<sup>-15</sup></b> | <b>7.83X10<sup>-14</sup></b> | <b>0.00</b>           | <b>1722</b>        | <b>2137</b>     |
| <b>Left lateral ventricle*</b>  | <b>0.29</b>      | <b>0.04</b> | <b>7.02</b>  | <b>0.21 - 0.37</b>   | <b>2.14x10<sup>-12</sup></b> | <b>3.00X10<sup>-11</sup></b> | <b>23.34</b>          | <b>1722</b>        | <b>2135</b>     |

**Abbreviations:** LH, left hemisphere; RH, right hemisphere; SE, standard error; CI, confidence interval; *I*<sup>2</sup>, heterogeneity index. All *p*-values are reported, uncorrected. *P*-values that passed the Bonferroni-adjusted alpha level ( $p < 1.49 \times 10^{-4}$ ) are highlighted in bold red (see Methods for statistical threshold determination). *P*-values that passed adjustment for false discovery rate (FDR) are highlighted in bold.

**Supplementary Table 27.** Full list of case-versus-control effect sizes for subcortical volume differences, including non-significant findings | ‘MTLE-L’ phenotype

| Structure                       | Cohen's <i>d</i> | SE          | Z score     | 95% CI             | <i>P</i> value               | FDR-adjusted<br><i>P</i> value | <i>I</i> <sup>2</sup> | Number of controls | Number of cases |
|---------------------------------|------------------|-------------|-------------|--------------------|------------------------------|--------------------------------|-----------------------|--------------------|-----------------|
| <b>Hippocampus (LH)*</b>        | -1.73            | 0.19        | -9.06       | -2.1 - -1.35       | <b>1.35x10<sup>-19</sup></b> | <b>1.13E-17</b>                | 85.53                 | 1412               | 410             |
| <b>Thalamus (LH)*</b>           | -0.84            | 0.13        | -6.69       | -1.09 - -0.6       | <b>2.19x10<sup>-11</sup></b> | <b>6.13X10-10</b>              | 70.46                 | 1384               | 408             |
| <b>Thalamus (RH)*</b>           | -0.46            | 0.12        | -3.94       | -0.69 - -0.23      | <b>8.12x10<sup>-5</sup></b>  | <b>3.25X10-4</b>               | 67.38                 | 1412               | 414             |
| <b>Pallidum (RH)*</b>           | -0.45            | 0.09        | -5.01       | -0.63 - -0.28      | <b>5.48x10<sup>-7</sup></b>  | <b>3.54X10-6</b>               | 43.98                 | 1406               | 414             |
| <b>Putamen (LH)*</b>            | -0.39            | 0.08        | -4.88       | -0.54 - -0.23      | <b>1.07x10<sup>-6</sup></b>  | <b>6.42X10-6</b>               | 28.47                 | 1352               | 410             |
| Putamen (RH)                    | -0.28            | 0.11        | -2.53       | -0.5 - -0.06       | 1.13x10 <sup>-2</sup>        | <b>2.43X10-2</b>               | 64.26                 | 1386               | 412             |
| Pallidum (LH)                   | -0.27            | 0.15        | -1.80       | -0.56 - 0.02       | 7.25x10 <sup>-2</sup>        | 1.11X10-1                      | 80.31                 | 1332               | 398             |
| Amygdala (LH)                   | -0.22            | 0.09        | -2.32       | -0.4 - -0.03       | 2.03x10 <sup>-2</sup>        | <b>3.88X10-2</b>               | 49.18                 | 1413               | 412             |
| Hippocampus (RH)                | -0.20            | 0.14        | -1.41       | -0.49 - 0.08       | 1.59x10 <sup>-1</sup>        | 2.09X10-1                      | 79.22                 | 1417               | 414             |
| Caudate (LH)                    | -0.18            | 0.12        | -1.55       | -0.41 - 0.05       | 1.22x10 <sup>-1</sup>        | 1.69X10-1                      | 68.17                 | 1418               | 414             |
| Accumbens (RH)                  | -0.12            | 0.16        | -0.76       | -0.44 - 0.19       | 4.47x10 <sup>-1</sup>        | 4.94X10-1                      | 83.08                 | 1396               | 413             |
| Accumbens (LH)                  | -0.10            | 0.13        | -0.78       | -0.36 - 0.15       | 4.36x10 <sup>-1</sup>        | 4.88X10-1                      | 74.43                 | 1402               | 413             |
| Caudate (RH)                    | -0.06            | 0.12        | -0.54       | -0.29 - 0.16       | 5.87x10 <sup>-1</sup>        | 6.16X10-1                      | 67.36                 | 1419               | 413             |
| Amygdala (RH)                   | 0.27             | 0.09        | 2.93        | 0.09 - 0.44        | 3.42x10 <sup>-3</sup>        | <b>8.71X10-3</b>               | 44.66                 | 1387               | 398             |
| <b>Right lateral ventricle*</b> | <b>0.36</b>      | <b>0.09</b> | <b>3.92</b> | <b>0.18 - 0.54</b> | <b>8.95x10<sup>-5</sup></b>  | <b>3.42X10-4</b>               | <b>47.23</b>          | <b>1418</b>        | <b>414</b>      |
| <b>Left lateral ventricle*</b>  | <b>0.47</b>      | <b>0.09</b> | <b>5.20</b> | <b>0.29 - 0.64</b> | <b>1.96x10<sup>-7</sup></b>  | <b>1.83X10-6</b>               | <b>43.12</b>          | <b>1417</b>        | <b>414</b>      |

**Abbreviations:** LH, left hemisphere; RH, right hemisphere; SE, standard error; CI, confidence interval; *I*<sup>2</sup>, heterogeneity index. All *p*-values are reported, uncorrected. *P*-values that passed the Bonferroni-adjusted alpha level ( $p < 1.49 \times 10^{-4}$ ) are highlighted in bold red (see Methods for statistical threshold determination). *P*-values that passed adjustment for false discovery rate (FDR) are highlighted in bold.

**Supplementary Table 28.** Full list of case-versus-control effect sizes for subcortical volume differences, including non-significant findings | ‘MTLE-R’ phenotype

| Structure                       | Cohen's <i>d</i> | SE           | Z score        | 95% CI               | <i>P</i> value               | FDR-adjusted<br><i>P</i> value | <i>I</i> <sup>2</sup> | Number of controls | Number of cases |
|---------------------------------|------------------|--------------|----------------|----------------------|------------------------------|--------------------------------|-----------------------|--------------------|-----------------|
| <b>Hippocampus (RH)*</b>        | <b>-1.906</b>    | <b>0.150</b> | <b>-12.694</b> | <b>-2.2 - -1.61</b>  | <b>6.36x10<sup>-37</sup></b> | <b>5.34E-35</b>                | <b>72.476</b>         | <b>1286</b>        | <b>336</b>      |
| <b>Thalamus (RH)*</b>           | <b>-0.727</b>    | <b>0.103</b> | <b>-7.066</b>  | <b>-0.93 - -0.53</b> | <b>1.60x10<sup>-12</sup></b> | <b>6.72X10-11</b>              | <b>51.499</b>         | <b>1285</b>        | <b>335</b>      |
| Thalamus (LH)                   | -0.472           | 0.209        | -2.256         | -0.88 - -0.06        | 2.41x10 <sup>-2</sup>        | 5.23X10-2                      | 88.785                | 1255               | 316             |
| <b>Putamen (RH)*</b>            | <b>-0.470</b>    | <b>0.135</b> | <b>-3.484</b>  | <b>-0.73 - -0.21</b> | <b>4.94x10<sup>-4</sup></b>  | <b>2.18X10-3</b>               | <b>72.787</b>         | <b>1258</b>        | <b>337</b>      |
| <b>Pallidum (RH)*</b>           | <b>-0.451</b>    | <b>0.089</b> | <b>-5.071</b>  | <b>-0.62 - -0.28</b> | <b>3.96x10<sup>-7</sup></b>  | <b>5.54X10-6</b>               | <b>36.432</b>         | <b>1278</b>        | <b>332</b>      |
| Putamen (LH)                    | -0.302           | 0.127        | -2.382         | -0.55 - -0.05        | 1.72x10 <sup>-2</sup>        | 4.13X10-2                      | 69.055                | 1204               | 330             |
| Pallidum (LH)                   | -0.298           | 0.122        | -2.450         | -0.54 - -0.06        | 1.43x10 <sup>-2</sup>        | 3.64X10-2                      | 65.376                | 1177               | 319             |
| Caudate (LH)                    | -0.196           | 0.091        | -2.152         | -0.37 - -0.02        | 3.14x10 <sup>-2</sup>        | 6.43X10-2                      | 41.090                | 1291               | 337             |
| Caudate (RH)                    | -0.191           | 0.100        | -1.900         | -0.39 - 0.01         | 5.74x10 <sup>-2</sup>        | 9.84X10-2                      | 51.200                | 1292               | 337             |
| Hippocampus (LH)                | -0.169           | 0.088        | -1.913         | -0.34 - 0            | 5.57x10 <sup>-2</sup>        | 9.75X10-2                      | 37.104                | 1277               | 337             |
| Accumbens (RH)                  | -0.026           | 0.135        | -0.195         | -0.29 - 0.24         | 8.45x10 <sup>-1</sup>        | 8.62X10-1                      | 73.035                | 1269               | 336             |
| Amygdala (RH)                   | 0.027            | 0.121        | 0.221          | -0.21 - 0.26         | 8.25x10 <sup>-1</sup>        | 8.56X10-1                      | 66.130                | 1260               | 331             |
| Accumbens (LH)                  | 0.055            | 0.093        | 0.586          | -0.13 - 0.24         | 5.58x10 <sup>-1</sup>        | 6.42X10-1                      | 43.313                | 1275               | 336             |
| Amygdala (LH)                   | 0.228            | 0.080        | 2.860          | 0.07 - 0.38          | 4.24x10 <sup>-3</sup>        | 1.48X10-2                      | 24.820                | 1286               | 334             |
| <b>Left lateral ventricle*</b>  | <b>0.390</b>     | <b>0.081</b> | <b>4.808</b>   | <b>0.23 - 0.55</b>   | <b>1.52x10<sup>-6</sup></b>  | <b>1.60X10-5</b>               | <b>26.750</b>         | <b>1291</b>        | <b>338</b>      |
| <b>Right lateral ventricle*</b> | <b>0.444</b>     | <b>0.065</b> | <b>6.867</b>   | <b>0.32 - 0.57</b>   | <b>6.57x10<sup>-12</sup></b> | <b>1.84X10-10</b>              | <b>0.003</b>          | <b>1292</b>        | <b>338</b>      |

**Abbreviations:** LH, left hemisphere; RH, right hemisphere; SE, standard error; CI, confidence interval; *I*<sup>2</sup>, heterogeneity index. All *p*-values are reported, uncorrected. *P*-values that passed the Bonferroni-adjusted alpha level ( $p < 1.49 \times 10^{-4}$ ) are highlighted in bold red (see Methods for statistical threshold determination). *P*-values that passed adjustment for false discovery rate (FDR) are highlighted in bold.



**Supplementary Table 29.** Full list of case-versus-control effect sizes for subcortical volume differences, including non-significant findings | 'IGE' phenotype

| Structure               | Cohen's <i>d</i> | SE           | Z score       | 95% CI            | <i>P</i> value              | FDR-adjusted <i>P</i> value | <i>I</i> <sup>2</sup> | Number of controls | Number of cases |
|-------------------------|------------------|--------------|---------------|-------------------|-----------------------------|-----------------------------|-----------------------|--------------------|-----------------|
| <b>Thalamus (RH)*</b>   | <b>-0.403</b>    | <b>0.087</b> | <b>-4.633</b> | <b>-0.57-0.23</b> | <b>3.60x10<sup>-6</sup></b> | <b>1.0X10<sup>-4</sup></b>  | <b>39.715</b>         | <b>1210</b>        | <b>363</b>      |
| Thalamus (LH)           | -0.401           | 0.135        | -2.969        | -0.67-0.14        | 2.99x10 <sup>-3</sup>       | <b>2.8X10<sup>-2</sup></b>  | 74.334                | 1181               | 360             |
| <b>Pallidum (RH)*</b>   | <b>-0.349</b>    | <b>0.097</b> | <b>-3.585</b> | <b>-0.54-0.16</b> | <b>3.37x10<sup>-4</sup></b> | <b>7.1X10<sup>-3</sup></b>  | <b>51.278</b>         | <b>1204</b>        | <b>363</b>      |
| Hippocampus (LH)        | -0.319           | 0.136        | -2.345        | -0.59-0.05        | 1.90x10 <sup>-2</sup>       | 1.1X10 <sup>-1</sup>        | 74.899                | 1204               | 363             |
| Putamen (LH)            | -0.285           | 0.089        | -3.212        | -0.46-0.11        | 1.32x10 <sup>-3</sup>       | <b>1.6X10<sup>-2</sup></b>  | 39.930                | 1130               | 353             |
| Caudate (LH)            | -0.248           | 0.076        | -3.267        | -0.4-0.1          | 1.09x10 <sup>-3</sup>       | <b>1.5X10<sup>-2</sup></b>  | 23.174                | 1218               | 362             |
| Hippocampus (RH)        | -0.247           | 0.133        | -1.856        | -0.510.01         | 6.35x10 <sup>-2</sup>       | 2.7X10 <sup>-1</sup>        | 73.934                | 1214               | 361             |
| Putamen (RH)            | -0.234           | 0.113        | -2.061        | -0.46-0.01        | 3.93x10 <sup>-2</sup>       | 2.1X10 <sup>-1</sup>        | 63.221                | 1186               | 358             |
| Caudate (RH)            | -0.198           | 0.081        | -2.425        | -0.36-0.04        | 1.53x10 <sup>-2</sup>       | 9.9X10 <sup>-2</sup>        | 32.687                | 1219               | 363             |
| Pallidum (LH)           | -0.159           | 0.184        | -0.868        | -0.520.2          | 3.85x10 <sup>-1</sup>       | 7.0X10 <sup>-1</sup>        | 85.876                | 1103               | 344             |
| Accumbens (RH)          | -0.148           | 0.086        | -1.706        | -0.320.02         | 8.81x10 <sup>-2</sup>       | 3.2X10 <sup>-1</sup>        | 39.638                | 1199               | 364             |
| Accumbens (LH)          | -0.131           | 0.098        | -1.346        | -0.320.06         | 1.78x10 <sup>-1</sup>       | 4.7X10 <sup>-1</sup>        | 51.808                | 1204               | 364             |
| Amygdala (RH)           | -0.122           | 0.091        | -1.347        | -0.30.06          | 1.78x10 <sup>-1</sup>       | 4.7X10 <sup>-1</sup>        | 44.927                | 1187               | 363             |
| Amygdala (LH)           | -0.050           | 0.134        | -0.372        | -0.310.21         | 7.10x10 <sup>-1</sup>       | 8.9X10 <sup>-1</sup>        | 73.766                | 1214               | 353             |
| Left lateral ventricle  | 0.237            | 0.085        | 2.795         | 0.070.4           | 5.20x10 <sup>-3</sup>       | <b>4.0X10<sup>-2</sup></b>  | 36.912                | 1216               | 360             |
| Right lateral ventricle | 0.265            | 0.080        | 3.313         | 0.110.42          | 9.23x10 <sup>-4</sup>       | <b>1.5X10<sup>-2</sup></b>  | 29.877                | 1216               | 362             |

**Abbreviations:** LH, left hemisphere; RH, right hemisphere; SE, standard error; CI, confidence interval; *I*<sup>2</sup>, heterogeneity index. All *p*-values are reported, uncorrected. *P*-values that passed the Bonferroni-adjusted alpha level ( $p < 1.49 \times 10^{-4}$ ) are highlighted in bold red (see Methods for statistical threshold determination). *P*-values that passed adjustment for false discovery rate (FDR) are highlighted in bold.

**Supplementary Table 30.** Full list of case-versus-control effect sizes for subcortical volume differences, including non-significant findings | ‘All other epilepsies’ phenotype

| Structure                       | Cohen's <i>d</i> | SE    | Z score | 95% CI          | <i>P</i> value               | FDR-adjusted <i>P</i> value | <i>I</i> <sup>2</sup> | Number of controls | Number of cases |
|---------------------------------|------------------|-------|---------|-----------------|------------------------------|-----------------------------|-----------------------|--------------------|-----------------|
| <b>Thalamus (RH)*</b>           | -0.305           | 0.047 | -6.502  | -0.397 - -0.213 | <b>7.92x10<sup>-11</sup></b> | 1.66X10 <sup>-9</sup>       | 4.985                 | 1446               | 998             |
| <b>Pallidum (RH)*</b>           | -0.235           | 0.060 | -3.942  | -0.352 - -0.118 | <b>8.07x10<sup>-05</sup></b> | 5.30X10 <sup>-6</sup>       | 36.141                | 1440               | 976             |
| Thalamus (LH)                   | -0.197           | 0.079 | -2.479  | -0.353 - -0.041 | 0.0132                       | 2.77X10 <sup>-5</sup>       | 63.279                | 1417               | 993             |
| Putamen (LH)                    | -0.193           | 0.082 | -2.361  | -0.353 - -0.033 | 0.0182                       | 5.74X10 <sup>-5</sup>       | 64.184                | 1366               | 955             |
| Pallidum (LH)                   | -0.208           | 0.090 | -2.303  | -0.385 - -0.031 | 0.0213                       | 3.08X10 <sup>-4</sup>       | 70.311                | 1339               | 903             |
| Putamen (RH)                    | -0.166           | 0.083 | -1.998  | -0.329 - -0.003 | 0.0457                       | 5.11X10 <sup>-4</sup>       | 66.530                | 1420               | 993             |
| Caudate (LH)                    | -0.070           | 0.059 | -1.190  | -0.185 - 0.045  | 0.2341                       | 2.84X10 <sup>-2</sup>       | 34.736                | 1453               | 995             |
| Hippocampus (RH)                | -0.041           | 0.046 | -0.875  | -0.131 - 0.05   | 0.3815                       | 3.73X10 <sup>-2</sup>       | 3.179                 | 1448               | 991             |
| Hippocampus (LH)                | -0.021           | 0.056 | -0.374  | -0.132 - 0.09   | 0.7084                       | 4.16X10 <sup>-2</sup>       | 29.722                | 1439               | 988             |
| Accumbens (RH)                  | 0.016            | 0.091 | 0.171   | -0.163 - 0.194  | 0.8642                       | 7.83X10 <sup>-2</sup>       | 72.286                | 1431               | 997             |
| Caudate (RH)                    | -0.009           | 0.062 | -0.149  | -0.131 - 0.112  | 0.8813                       | 2.98X10 <sup>-1</sup>       | 41.439                | 1454               | 997             |
| Accumbens (LH)                  | -0.011           | 0.096 | -0.111  | -0.199 - 0.178  | 0.9118                       | 4.58X10 <sup>-1</sup>       | 75.051                | 1437               | 996             |
| <b>Left lateral ventricle*</b>  | 0.198            | 0.045 | 4.373   | 0.109 - 0.287   | <b>1.23x10<sup>-05</sup></b> | 8.15X10 <sup>-1</sup>       | 0.218                 | 1452               | 996             |
| <b>Right lateral ventricle*</b> | 0.212            | 0.046 | 4.581   | 0.122 - 0.303   | <b>4.62x10<sup>-06</sup></b> | 9.18X10 <sup>-1</sup>       | 3.528                 | 1453               | 996             |
| <b>Amygdala (RH)*</b>           | 0.218            | 0.057 | 3.799   | 0.106 - 0.33    | <b>1.46x10<sup>-04</sup></b> | 9.18X10 <sup>-1</sup>       | 31.256                | 1422               | 989             |
| <b>Amygdala (LH)*</b>           | 0.327            | 0.065 | 5.024   | 0.199 - 0.455   | <b>5.05x10<sup>-07</sup></b> | 9.18X10 <sup>-1</sup>       | 45.470                | 1448               | 998             |

**Abbreviations:** LH, left hemisphere; RH, right hemisphere; SE, standard error; CI, confidence interval; *I*<sup>2</sup>, heterogeneity index. All *p*-values are reported, uncorrected. *P*-values that passed the Bonferroni-adjusted alpha level ( $p < 1.49 \times 10^{-4}$ ) are highlighted in bold red (see Methods for statistical threshold determination).

**Supplementary Table 31.** Full list of case-versus-control effect sizes for cortical thickness differences, including nominal and non-significant findings | 'All epilepsies' phenotype

| Structure                     | Cohen's <i>d</i> | SE   | Z score | 95% CI        | <i>P</i> value               | FDR-adjusted <i>P</i> value | <i>f</i> <sup>2</sup> | Number of controls | Number of cases |
|-------------------------------|------------------|------|---------|---------------|------------------------------|-----------------------------|-----------------------|--------------------|-----------------|
| <b>R_precentral*</b>          | -0.40            | 0.04 | -9.10   | -0.49 - -0.31 | <b>8.85x10<sup>-20</sup></b> | <b>7.43E-18</b>             | <b>27.93</b>          | <b>1649</b>        | <b>2054</b>     |
| <b>L_precentral*</b>          | -0.38            | 0.04 | -8.77   | -0.47 - -0.3  | <b>1.82x10<sup>-18</sup></b> | <b>7.64E-17</b>             | <b>27.65</b>          | <b>1645</b>        | <b>2058</b>     |
| <b>L_caudalmiddlefrontal*</b> | -0.32            | 0.04 | -7.93   | -0.4 - -0.24  | <b>2.11x10<sup>-15</sup></b> | <b>5.91X10-14</b>           | <b>17.11</b>          | <b>1650</b>        | <b>2061</b>     |
| <b>R_paracental*</b>          | -0.32            | 0.05 | -5.98   | -0.42 - -0.21 | <b>2.19x10<sup>-9</sup></b>  | <b>2.04X10-8</b>            | <b>49.26</b>          | <b>1654</b>        | <b>2059</b>     |
| <b>R_superiorparietal</b>     | -0.31            | 0.09 | -3.35   | -0.5 - -0.13  | 8.13x10 <sup>-4</sup>        | <b>2.14X10-3</b>            | 84.46                 | 1653               | 2058            |
| <b>L_paracental</b>           | -0.31            | 0.07 | -4.75   | -0.44 - -0.18 | <b>2.05x10<sup>-6</sup></b>  | <b>1.01X10-5</b>            | <b>67.48</b>          | <b>1650</b>        | <b>2061</b>     |
| <b>R_caudalmiddlefrontal*</b> | -0.31            | 0.05 | -5.99   | -0.41 - -0.21 | <b>2.09x10<sup>-9</sup></b>  | <b>2.04X10-8</b>            | <b>46.44</b>          | <b>1653</b>        | <b>2059</b>     |
| <b>L_superiorparietal</b>     | -0.29            | 0.08 | -3.75   | -0.44 - -0.14 | <b>1.78x10<sup>-4</sup></b>  | <b>5.54X10-4</b>            | 76.42                 | 1645               | 2058            |
| <b>L_superiorfrontal*</b>     | -0.28            | 0.05 | -5.25   | -0.39 - -0.18 | <b>1.51x10<sup>-7</sup></b>  | <b>9.76X10-7</b>            | <b>51.77</b>          | <b>1649</b>        | <b>2059</b>     |
| <b>R_precuneus*</b>           | -0.28            | 0.07 | -4.20   | -0.4 - -0.15  | <b>2.70x10<sup>-5</sup></b>  | <b>1.07X10-4</b>            | <b>67.61</b>          | <b>1654</b>        | <b>2055</b>     |
| <b>R_superiorfrontal*</b>     | -0.27            | 0.06 | -4.59   | -0.38 - -0.15 | <b>4.49x10<sup>-6</sup></b>  | <b>2.10X10-5</b>            | <b>59.48</b>          | <b>1650</b>        | <b>2058</b>     |
| <b>L_entorhinal*</b>          | -0.26            | 0.06 | -4.26   | -0.39 - -0.14 | <b>2.04x10<sup>-5</sup></b>  | <b>8.57X10-5</b>            | <b>56.65</b>          | <b>1402</b>        | <b>1724</b>     |
| <b>L_precuneus</b>            | -0.25            | 0.08 | -3.00   | -0.41 - -0.09 | 2.66x10 <sup>-3</sup>        | <b>6.04X10-3</b>            | 79.94                 | 1649               | 2059            |
| <b>L_supramarginal*</b>       | -0.23            | 0.06 | -3.89   | -0.35 - -0.12 | <b>9.87x10<sup>-5</sup></b>  | <b>3.32X10-4</b>            | <b>59.39</b>          | <b>1606</b>        | <b>1965</b>     |
| <b>R_supramarginal*</b>       | -0.22            | 0.06 | -4.04   | -0.33 - -0.12 | <b>5.24x10<sup>-5</sup></b>  | <b>1.91X10-4</b>            | <b>52.90</b>          | <b>1597</b>        | <b>1971</b>     |
| <b>L_temporalpole</b>         | -0.20            | 0.06 | -3.37   | -0.32 - -0.09 | 7.49x10 <sup>-4</sup>        | <b>2.10X10-3</b>            | 62.12                 | 1643               | 2055            |
| <b>R_cuneus*</b>              | -0.20            | 0.04 | -5.33   | -0.28 - -0.13 | <b>9.68x10<sup>-8</sup></b>  | <b>6.78X10-7</b>            | <b>11.42</b>          | <b>1651</b>        | <b>2057</b>     |
| <b>R_lateraloccipital</b>     | -0.20            | 0.06 | -3.13   | -0.32 - -0.07 | 1.77x10 <sup>-3</sup>        | <b>4.37X10-3</b>            | 65.81                 | 1653               | 2058            |
| <b>L_middletemporal</b>       | -0.20            | 0.07 | -2.88   | -0.33 - -0.06 | 4.01x10 <sup>-3</sup>        | <b>8.64X10-3</b>            | 69.58                 | 1546               | 1955            |
| <b>R_parstriangularis*</b>    | -0.20            | 0.04 | -5.48   | -0.27 - -0.13 | <b>4.25x10<sup>-8</sup></b>  | <b>3.25X10-7</b>            | <b>4.66</b>           | <b>1652</b>        | <b>2058</b>     |
| <b>L_inferiorparietal</b>     | -0.20            | 0.07 | -2.79   | -0.34 - -0.06 | 5.29x10 <sup>-3</sup>        | <b>1.08X10-2</b>            | 72.32                 | 1639               | 2052            |
| <b>R_rostralmiddlefrontal</b> | -0.20            | 0.06 | -3.43   | -0.31 - -0.08 | 5.94x10 <sup>-4</sup>        | <b>1.72X10-3</b>            | 57.60                 | 1654               | 2058            |

|                               |              |             |              |                      |                             |                             |              |             |             |
|-------------------------------|--------------|-------------|--------------|----------------------|-----------------------------|-----------------------------|--------------|-------------|-------------|
| <b>L_transversetemporal*</b>  | <b>-0.19</b> | <b>0.04</b> | <b>-4.41</b> | <b>-0.28 - -0.11</b> | <b>1.05x10<sup>-5</sup></b> | <b>4.64X10<sup>-5</sup></b> | <b>28.18</b> | <b>1647</b> | <b>2061</b> |
| <b>L_parstriangularis*</b>    | <b>-0.19</b> | <b>0.05</b> | <b>-3.83</b> | <b>-0.29 - -0.09</b> | <b>1.29x10<sup>-4</sup></b> | <b>4.17X10<sup>-4</sup></b> | <b>44.41</b> | <b>1650</b> | <b>2060</b> |
| L_lateraloccipital            | -0.19        | 0.09        | -2.10        | -0.37 - -0.01        | 3.58x10 <sup>-2</sup>       | 5.47X10 <sup>-2</sup>       | 83.47        | 1650        | 2060        |
| <b>L_fusiform</b>             | <b>-0.19</b> | <b>0.06</b> | <b>-3.08</b> | <b>-0.31 - -0.07</b> | <b>2.10x10<sup>-3</sup></b> | <b>5.04X10<sup>-3</sup></b> | <b>62.37</b> | <b>1644</b> | <b>2058</b> |
| <b>R_transversetemporal*</b>  | <b>-0.18</b> | <b>0.04</b> | <b>-4.19</b> | <b>-0.27 - -0.1</b>  | <b>2.81x10<sup>-5</sup></b> | <b>1.07X10<sup>-4</sup></b> | <b>27.92</b> | <b>1654</b> | <b>2059</b> |
| <b>R_temporalpole</b>         | <b>-0.18</b> | <b>0.05</b> | <b>-3.45</b> | <b>-0.28 - -0.08</b> | <b>5.51x10<sup>-4</sup></b> | <b>1.65X10<sup>-3</sup></b> | <b>48.99</b> | <b>1648</b> | <b>2048</b> |
| <b>L_superiortemporal</b>     | <b>-0.18</b> | <b>0.08</b> | <b>-2.22</b> | <b>-0.34 - -0.02</b> | <b>2.62x10<sup>-2</sup></b> | <b>4.23X10<sup>-2</sup></b> | <b>77.96</b> | <b>1533</b> | <b>1937</b> |
| L_lingual                     | -0.18        | 0.08        | -2.11        | -0.34 - -0.01        | 3.50x10 <sup>-2</sup>       | 5.47X10 <sup>-2</sup>       | 81.01        | 1649        | 2061        |
| <b>R_parsopercularis*</b>     | <b>-0.18</b> | <b>0.04</b> | <b>-4.98</b> | <b>-0.25 - -0.11</b> | <b>6.48x10<sup>-7</sup></b> | <b>3.63X10<sup>-6</sup></b> | <b>2.62</b>  | <b>1652</b> | <b>2059</b> |
| <b>R_inferiorparietal</b>     | <b>-0.17</b> | <b>0.07</b> | <b>-2.30</b> | <b>-0.32 - -0.03</b> | <b>2.15x10<sup>-2</sup></b> | <b>3.61X10<sup>-2</sup></b> | <b>75.03</b> | <b>1643</b> | <b>2045</b> |
| <b>R_lingual</b>              | <b>-0.16</b> | <b>0.05</b> | <b>-3.35</b> | <b>-0.26 - -0.07</b> | <b>8.14x10<sup>-4</sup></b> | <b>2.14X10<sup>-3</sup></b> | <b>40.47</b> | <b>1653</b> | <b>2056</b> |
| <b>R_entorhinal</b>           | <b>-0.16</b> | <b>0.06</b> | <b>-2.86</b> | <b>-0.27 - -0.05</b> | <b>4.24x10<sup>-3</sup></b> | <b>8.90X10<sup>-3</sup></b> | <b>45.90</b> | <b>1373</b> | <b>1691</b> |
| L_cuneus                      | -0.16        | 0.09        | -1.79        | -0.33 - 0.01         | 7.27x10 <sup>-2</sup>       | 1.02X10 <sup>-1</sup>       | 82.33        | 1648        | 2061        |
| <b>L_parsopercularis</b>      | <b>-0.15</b> | <b>0.06</b> | <b>-2.69</b> | <b>-0.26 - -0.04</b> | <b>7.12x10<sup>-3</sup></b> | <b>1.39X10<sup>-2</sup></b> | <b>56.64</b> | <b>1648</b> | <b>2059</b> |
| <b>L_parsorbitalis</b>        | <b>-0.15</b> | <b>0.05</b> | <b>-3.04</b> | <b>-0.25 - -0.05</b> | <b>2.37x10<sup>-3</sup></b> | <b>5.53X10<sup>-3</sup></b> | <b>42.30</b> | <b>1650</b> | <b>2059</b> |
| <b>L_rostralmiddlefrontal</b> | <b>-0.15</b> | <b>0.06</b> | <b>-2.30</b> | <b>-0.27 - -0.02</b> | <b>2.15x10<sup>-2</sup></b> | <b>3.61X10<sup>-2</sup></b> | <b>65.22</b> | <b>1649</b> | <b>2057</b> |
| <b>R_parsorbitalis</b>        | <b>-0.14</b> | <b>0.05</b> | <b>-2.64</b> | <b>-0.25 - -0.04</b> | <b>8.27x10<sup>-3</sup></b> | <b>1.58X10<sup>-2</sup></b> | <b>51.31</b> | <b>1654</b> | <b>2057</b> |
| <b>R_pericalcarine</b>        | <b>-0.13</b> | <b>0.05</b> | <b>-2.61</b> | <b>-0.23 - -0.03</b> | <b>9.15x10<sup>-3</sup></b> | <b>1.67X10<sup>-2</sup></b> | <b>44.34</b> | <b>1654</b> | <b>2056</b> |
| L_pericalcarine               | -0.13        | 0.09        | -1.46        | -0.3 - 0.04          | 1.43x10 <sup>-1</sup>       | 1.79X10 <sup>-1</sup>       | 82.76        | 1650        | 2059        |
| L_postcentral                 | -0.13        | 0.09        | -1.38        | -0.3 - 0.05          | 1.67x10 <sup>-1</sup>       | 2.00X10 <sup>-1</sup>       | 83.46        | 1647        | 2056        |
| <b>R_middletemporal</b>       | <b>-0.12</b> | <b>0.04</b> | <b>-2.97</b> | <b>-0.21 - -0.04</b> | <b>3.02x10<sup>-3</sup></b> | <b>6.68X10<sup>-3</sup></b> | <b>22.16</b> | <b>1642</b> | <b>2050</b> |
| R_superiortemporal            | -0.12        | 0.06        | -2.07        | -0.24 - -0.01        | 3.84x10 <sup>-2</sup>       | 5.70X10 <sup>-2</sup>       | 58.96        | 1555        | 1958        |
| R_postcentral                 | -0.12        | 0.10        | -1.15        | -0.31 - 0.08         | 2.49x10 <sup>-1</sup>       | 2.87X10 <sup>-1</sup>       | 86.70        | 1648        | 2057        |
| <b>R_fusiform</b>             | <b>-0.12</b> | <b>0.04</b> | <b>-2.63</b> | <b>-0.2 - -0.03</b>  | <b>8.56x10<sup>-3</sup></b> | <b>1.60X10<sup>-2</sup></b> | <b>29.46</b> | <b>1650</b> | <b>2057</b> |
| R_lateralorbitofrontal        | -0.11        | 0.05        | -2.07        | -0.21 - -0.01        | 3.87x10 <sup>-2</sup>       | 5.70X10 <sup>-2</sup>       | 50.33        | 1651        | 2057        |
| <b>R_frontalpole</b>          | <b>-0.11</b> | <b>0.05</b> | <b>-2.26</b> | <b>-0.2 - -0.01</b>  | <b>2.37x10<sup>-2</sup></b> | <b>3.90X10<sup>-2</sup></b> | <b>40.18</b> | <b>1654</b> | <b>2057</b> |
| <b>L parahippocampal</b>      | <b>-0.10</b> | <b>0.04</b> | <b>-2.36</b> | <b>-0.19 - -0.02</b> | <b>1.83x10<sup>-2</sup></b> | <b>3.20X10<sup>-2</sup></b> | <b>28.98</b> | <b>1637</b> | <b>2050</b> |

|                            |       |      |       |               |                       |                             |       |      |      |
|----------------------------|-------|------|-------|---------------|-----------------------|-----------------------------|-------|------|------|
| <b>R_parahippocampal</b>   | -0.09 | 0.03 | -2.70 | -0.16 - -0.03 | 6.95x10 <sup>-3</sup> | <b>1.39X10<sup>-2</sup></b> | 0.00  | 1650 | 2053 |
| L_bankssts                 | -0.09 | 0.08 | -1.16 | -0.25 - 0.06  | 2.45x10 <sup>-1</sup> | 2.86X10 <sup>-1</sup>       | 76.88 | 1584 | 1927 |
| L_inferiortemporal         | -0.09 | 0.06 | -1.49 | -0.2 - 0.03   | 1.37x10 <sup>-1</sup> | 1.74X10 <sup>-1</sup>       | 57.73 | 1648 | 2055 |
| L_posteriorcingulate       | -0.08 | 0.04 | -1.88 | -0.17 - 0     | 6.01x10 <sup>-2</sup> | 8.70X10 <sup>-2</sup>       | 30.06 | 1650 | 2059 |
| L_frontalpole              | -0.08 | 0.05 | -1.63 | -0.17 - 0.02  | 1.04x10 <sup>-1</sup> | 1.39X10 <sup>-1</sup>       | 39.69 | 1648 | 2058 |
| R_inferiortemporal         | -0.07 | 0.04 | -1.73 | -0.15 - 0.01  | 8.36x10 <sup>-2</sup> | 1.15X10 <sup>-1</sup>       | 22.58 | 1652 | 2057 |
| R_posteriorcingulate       | -0.07 | 0.06 | -1.11 | -0.19 - 0.05  | 2.65x10 <sup>-1</sup> | 3.01X10 <sup>-1</sup>       | 64.86 | 1654 | 2056 |
| L_lateralorbitofrontal     | -0.07 | 0.05 | -1.45 | -0.16 - 0.02  | 1.46x10 <sup>-1</sup> | 1.79X10 <sup>-1</sup>       | 33.61 | 1645 | 2060 |
| R_bankssts                 | -0.06 | 0.06 | -0.90 | -0.18 - 0.07  | 3.66x10 <sup>-1</sup> | 4.05X10 <sup>-1</sup>       | 66.15 | 1621 | 2023 |
| R_medialorbitofrontal      | -0.05 | 0.03 | -1.53 | -0.12 - 0.02  | 1.26x10 <sup>-1</sup> | 1.65X10 <sup>-1</sup>       | 0.00  | 1636 | 2025 |
| L_isthmuscingulate         | -0.05 | 0.04 | -1.37 | -0.12 - 0.02  | 1.72x10 <sup>-1</sup> | 2.03X10 <sup>-1</sup>       | 4.69  | 1649 | 2057 |
| R_insula                   | -0.02 | 0.05 | -0.46 | -0.11 - 0.07  | 6.42x10 <sup>-1</sup> | 6.91X10 <sup>-1</sup>       | 35.96 | 1615 | 2032 |
| L_rostralanteriorcingulate | -0.01 | 0.06 | -0.21 | -0.13 - 0.1   | 8.34x10 <sup>-1</sup> | 8.54X10 <sup>-1</sup>       | 58.16 | 1645 | 2048 |
| L_medialorbitofrontal      | 0.01  | 0.03 | 0.15  | -0.06 - 0.07  | 8.82x10 <sup>-1</sup> | 8.82X10 <sup>-1</sup>       | 0.00  | 1632 | 2030 |
| R_isthmuscingulate         | 0.01  | 0.05 | 0.18  | -0.09 - 0.11  | 8.56x10 <sup>-1</sup> | 8.66X10 <sup>-1</sup>       | 43.20 | 1651 | 2057 |
| L_insula                   | 0.01  | 0.05 | 0.29  | -0.08 - 0.11  | 7.73x10 <sup>-1</sup> | 8.22X10 <sup>-1</sup>       | 37.86 | 1610 | 2026 |
| R_caudalanteriorcingulate  | 0.01  | 0.06 | 0.22  | -0.11 - 0.14  | 8.24x10 <sup>-1</sup> | 8.54X10 <sup>-1</sup>       | 64.37 | 1652 | 2056 |
| L_caudalanteriorcingulate  | 0.04  | 0.04 | 0.92  | -0.04 - 0.12  | 3.59x10 <sup>-1</sup> | 4.02X10 <sup>-1</sup>       | 25.12 | 1645 | 2045 |
| R_rostralanteriorcingulate | 0.09  | 0.05 | 1.71  | -0.01 - 0.2   | 8.64x10 <sup>-2</sup> | 1.17X10 <sup>-1</sup>       | 52.42 | 1652 | 2055 |

**Abbreviations:** RH, right hemisphere, LH, left hemisphere, SE, standard error; CI, confidence interval;  $I^2$ , heterogeneity index. Abbreviations for all cortical brain regions are provided in Supplementary Table 4. Uncorrected  $p$ -values are reported. Brain regions are ranked according to effect size (negative to positive). Uncorrected  $P$ -values are listed in the 'P-values' column.  $P$ -values were compared to an adjusted alpha level of  $p < 1.49 \times 10^{-4}$ . Significant brain regions are **highlighted in red with an asterisk (\*)**.  $P$ -values surviving FDR correction are **highlighted in bold**.

**Supplementary Table 32.** Full list of case-versus-control effect sizes for cortical thickness differences, including non-significant findings | ‘MTLE-L’ phenotype

| Structure              | Cohen's <i>d</i> | SE   | Z score | 95% CI        | <i>P</i> value               | FDR-adjusted<br><i>P</i> value | <i>F</i> <sup>2</sup> | Number of controls | Number of cases |
|------------------------|------------------|------|---------|---------------|------------------------------|--------------------------------|-----------------------|--------------------|-----------------|
| L_precuneus*           | -0.54            | 0.14 | -3.96   | -0.8 - -0.27  | <b>7.35x10<sup>-5</sup></b>  | <b>3.087X10<sup>-4</sup></b>   | <b>75.18</b>          | <b>1343</b>        | <b>412</b>      |
| R_precentral*          | -0.49            | 0.08 | -6.34   | -0.64 - -0.34 | <b>2.37x10<sup>-10</sup></b> | <b>4.980X10<sup>-9</sup></b>   | <b>26.33</b>          | <b>1345</b>        | <b>412</b>      |
| R_superiorparietal     | -0.47            | 0.16 | -2.97   | -0.79 - -0.16 | 2.97x10 <sup>-3</sup>        | <b>7.796X10<sup>-3</sup></b>   | 82.40                 | 1347               | 412             |
| R_precuneus*           | -0.47            | 0.10 | -4.56   | -0.68 - -0.27 | <b>5.16x10<sup>-6</sup></b>  | <b>2.550X10<sup>-5</sup></b>   | <b>57.50</b>          | <b>1348</b>        | <b>412</b>      |
| L_superiorparietal     | -0.47            | 0.14 | -3.31   | -0.75 - -0.19 | 9.17x10 <sup>-4</sup>        | <b>2.963X10<sup>-3</sup></b>   | 77.79                 | 1340               | 412             |
| L_precentral*          | -0.47            | 0.08 | -5.76   | -0.63 - -0.31 | <b>8.64x10<sup>-9</sup></b>  | <b>9.070X10<sup>-8</sup></b>   | <b>31.60</b>          | <b>1339</b>        | <b>412</b>      |
| L_entorhinal*          | -0.44            | 0.07 | -6.16   | -0.59 - -0.3  | <b>7.35x10<sup>-10</sup></b> | <b>1.230X10<sup>-8</sup></b>   | <b>0.00</b>           | <b>1102</b>        | <b>303</b>      |
| R_caudalmiddlefrontal* | -0.44            | 0.09 | -5.09   | -0.61 - -0.27 | <b>3.61x10<sup>-7</sup></b>  | <b>2.760X10<sup>-6</sup></b>   | <b>39.44</b>          | <b>1348</b>        | <b>412</b>      |
| L_paracental*          | -0.43            | 0.10 | -4.31   | -0.62 - -0.23 | <b>1.61x10<sup>-5</sup></b>  | <b>7.510X10<sup>-5</sup></b>   | <b>53.17</b>          | <b>1344</b>        | <b>412</b>      |
| L_superiorfrontal*     | -0.41            | 0.06 | -6.80   | -0.53 - -0.29 | <b>1.02x10<sup>-11</sup></b> | <b>4.280X10<sup>-10</sup></b>  | <b>0.00</b>           | <b>1343</b>        | <b>412</b>      |
| L_caudalmiddlefrontal* | -0.40            | 0.07 | -5.79   | -0.54 - -0.27 | <b>7.07x10<sup>-9</sup></b>  | <b>8.480X10<sup>-8</sup></b>   | <b>13.81</b>          | <b>1344</b>        | <b>412</b>      |
| L_superiortemporal     | -0.40            | 0.11 | -3.61   | -0.62 - -0.18 | 3.11x10 <sup>-4</sup>        | <b>1.136X10<sup>-3</sup></b>   | 61.22                 | 1228               | 387             |
| R_paracental*          | -0.38            | 0.08 | -5.02   | -0.53 - -0.23 | <b>5.14x10<sup>-7</sup></b>  | <b>3.540X10<sup>-6</sup></b>   | <b>23.54</b>          | <b>1348</b>        | <b>412</b>      |
| R_superiorfrontal*     | -0.36            | 0.06 | -6.05   | -0.48 - -0.25 | <b>1.44x10<sup>-9</sup></b>  | <b>2.020X10<sup>-8</sup></b>   | <b>0.00</b>           | <b>1345</b>        | <b>412</b>      |
| L_fusiform*            | -0.36            | 0.07 | -5.18   | -0.49 - -0.22 | <b>2.19x10<sup>-7</sup></b>  | <b>1.840X10<sup>-6</sup></b>   | <b>13.46</b>          | <b>1339</b>        | <b>412</b>      |
| L_lingual              | -0.35            | 0.13 | -2.66   | -0.61 - -0.09 | 7.89x10 <sup>-3</sup>        | <b>1.821X10<sup>-2</sup></b>   | 74.50                 | 1343               | 412             |
| R_postcentral          | -0.33            | 0.14 | -2.36   | -0.61 - -0.06 | 1.83x10 <sup>-2</sup>        | <b>3.575X10<sup>-2</sup></b>   | 77.54                 | 1344               | 412             |
| L_postcentral          | -0.33            | 0.14 | -2.39   | -0.6 - -0.06  | 1.67x10 <sup>-2</sup>        | <b>3.421X10<sup>-2</sup></b>   | 76.12                 | 1341               | 411             |
| L_temporalpole*        | -0.31            | 0.07 | -4.65   | -0.45 - -0.18 | <b>3.33x10<sup>-6</sup></b>  | <b>1.750X10<sup>-5</sup></b>   | <b>10.90</b>          | <b>1341</b>        | <b>410</b>      |
| L_lateraloccipital     | -0.31            | 0.15 | -2.07   | -0.61 - -0.02 | 3.88x10 <sup>-2</sup>        | <b>6.651X10<sup>-2</sup></b>   | 80.53                 | 1344               | 412             |
| R_supramarginal        | -0.30            | 0.09 | -3.41   | -0.48 - -0.13 | 6.53x10 <sup>-4</sup>        | <b>2.286X10<sup>-3</sup></b>   | 41.23                 | 1292               | 400             |

|                            |              |             |              |                      |                                         |                                          |              |             |            |
|----------------------------|--------------|-------------|--------------|----------------------|-----------------------------------------|------------------------------------------|--------------|-------------|------------|
| <b>L_parahippocampal*</b>  | <b>-0.30</b> | <b>0.07</b> | <b>-4.11</b> | <b>-0.44 - -0.16</b> | <b><math>3.95 \times 10^{-5}</math></b> | <b><math>1.746 \times 10^{-4}</math></b> | <b>19.37</b> | <b>1335</b> | <b>410</b> |
| L_middletemporal           | -0.29        | 0.09        | -3.02        | -0.47 - -0.1         | $2.50 \times 10^{-3}$                   | $7.140 \times 10^{-3}$                   | 47.68        | 1241        | 386        |
| L_supramarginal            | -0.29        | 0.10        | -2.97        | -0.47 - -0.1         | $2.95 \times 10^{-3}$                   | $7.796 \times 10^{-3}$                   | 49.78        | 1300        | 395        |
| <b>R_parstriangularis*</b> | <b>-0.28</b> | <b>0.06</b> | <b>-4.74</b> | <b>-0.4 - -0.17</b>  | <b><math>2.16 \times 10^{-6}</math></b> | <b><math>1.210 \times 10^{-5}</math></b> | <b>0.00</b>  | <b>1346</b> | <b>412</b> |
| L_parstriangularis         | -0.28        | 0.09        | -3.05        | -0.46 - -0.1         | $2.30 \times 10^{-3}$                   | $6.900 \times 10^{-3}$                   | 47.12        | 1344        | 411        |
| R_inferiorparietal         | -0.28        | 0.12        | -2.41        | -0.51 - -0.05        | $1.61 \times 10^{-2}$                   | $3.381 \times 10^{-2}$                   | 66.56        | 1337        | 411        |
| R_lateraloccipital         | -0.25        | 0.12        | -2.09        | -0.49 - -0.02        | $3.64 \times 10^{-2}$                   | $6.506 \times 10^{-2}$                   | 69.72        | 1347        | 412        |
| L_inferiorparietal         | -0.24        | 0.13        | -1.87        | -0.5 - 0.01          | $6.13 \times 10^{-2}$                   | $9.715 \times 10^{-2}$                   | 73.10        | 1333        | 410        |
| R_rostralmiddlefrontal     | -0.24        | 0.09        | -2.55        | -0.43 - -0.06        | $1.07 \times 10^{-2}$                   | $2.365 \times 10^{-2}$                   | 49.71        | 1348        | 412        |
| L_inferiortemporal         | -0.21        | 0.07        | -2.77        | -0.35 - -0.06        | $5.65 \times 10^{-3}$                   | $1.396 \times 10^{-2}$                   | 22.59        | 1342        | 412        |
| L_rostralmiddlefrontal     | -0.20        | 0.10        | -2.01        | -0.4 - -0.01         | $4.41 \times 10^{-2}$                   | $7.409 \times 10^{-2}$                   | 55.49        | 1344        | 412        |
| L_parsopercularis          | -0.20        | 0.09        | -2.11        | -0.39 - -0.01        | $3.50 \times 10^{-2}$                   | $6.506 \times 10^{-2}$                   | 49.80        | 1342        | 411        |
| R_cuneus                   | -0.20        | 0.07        | -2.65        | -0.35 - -0.05        | $8.02 \times 10^{-3}$                   | $1.821 \times 10^{-2}$                   | 23.09        | 1345        | 412        |
| L_pericalcarine            | -0.20        | 0.12        | -1.62        | -0.44 - 0.04         | $1.05 \times 10^{-1}$                   | $1.521 \times 10^{-1}$                   | 70.05        | 1344        | 411        |
| R_fusiform                 | -0.20        | 0.06        | -3.29        | -0.31 - -0.08        | $1.00 \times 10^{-3}$                   | $3.111 \times 10^{-3}$                   | 0.00         | 1344        | 412        |
| L_cuneus                   | -0.19        | 0.13        | -1.50        | -0.44 - 0.06         | $1.34 \times 10^{-1}$                   | $1.815 \times 10^{-1}$                   | 72.19        | 1342        | 412        |
| R_superiortemporal         | -0.16        | 0.06        | -2.68        | -0.28 - -0.04        | $7.44 \times 10^{-3}$                   | $1.786 \times 10^{-2}$                   | 0.00         | 1249        | 398        |
| R_pericalcarine            | -0.16        | 0.08        | -2.08        | -0.32 - -0.01        | $3.73 \times 10^{-2}$                   | $6.528 \times 10^{-2}$                   | 28.72        | 1348        | 411        |
| R_transversetemporal       | -0.16        | 0.07        | -2.38        | -0.29 - -0.03        | $1.72 \times 10^{-2}$                   | $3.440 \times 10^{-2}$                   | 11.12        | 1348        | 412        |
| R_parsopercularis          | -0.16        | 0.08        | -1.94        | -0.31 - 0            | $5.21 \times 10^{-2}$                   | $8.578 \times 10^{-2}$                   | 31.30        | 1347        | 412        |
| R_lingual                  | -0.16        | 0.10        | -1.58        | -0.35 - 0.04         | $1.14 \times 10^{-1}$                   | $1.623 \times 10^{-1}$                   | 53.53        | 1348        | 412        |
| R_posteriorcingulate       | -0.15        | 0.10        | -1.54        | -0.34 - 0.04         | $1.23 \times 10^{-1}$                   | $1.694 \times 10^{-1}$                   | 52.26        | 1348        | 411        |
| L_parsorbitalis            | -0.15        | 0.09        | -1.64        | -0.33 - 0.03         | $1.02 \times 10^{-1}$                   | $1.503 \times 10^{-1}$                   | 46.44        | 1344        | 412        |
| L_transversetemporal       | -0.14        | 0.07        | -2.10        | -0.27 - -0.01        | $3.58 \times 10^{-2}$                   | $6.506 \times 10^{-2}$                   | 10.53        | 1341        | 412        |
| R_parsorbitalis            | -0.14        | 0.08        | -1.80        | -0.29 - 0.01         | $7.20 \times 10^{-2}$                   | $1.107 \times 10^{-1}$                   | 26.87        | 1348        | 412        |
| R_parahippocampal          | -0.13        | 0.09        | -1.45        | -0.3 - 0.04          | $1.46 \times 10^{-1}$                   | $1.947 \times 10^{-1}$                   | 40.53        | 1344        | 412        |
| R_lateralorbitofrontal     | -0.12        | 0.10        | -1.17        | -0.31 - 0.08         | $2.40 \times 10^{-1}$                   | $3.055 \times 10^{-1}$                   | 54.02        | 1347        | 412        |

|                            |       |      |       |              |                       |                                          |       |      |     |
|----------------------------|-------|------|-------|--------------|-----------------------|------------------------------------------|-------|------|-----|
| R_bankssts                 | -0.11 | 0.10 | -1.15 | -0.31 - 0.08 | $2.51 \times 10^{-1}$ | $3.138 \times 10^{-1}$                   | 52.54 | 1315 | 406 |
| R_frontalpole              | -0.10 | 0.06 | -1.67 | -0.22 - 0.02 | $9.53 \times 10^{-2}$ | $1.430 \times 10^{-1}$                   | 0.00  | 1348 | 411 |
| L_bankssts                 | -0.10 | 0.11 | -0.89 | -0.32 - 0.12 | $3.72 \times 10^{-1}$ | $4.401 \times 10^{-1}$                   | 62.31 | 1279 | 383 |
| R_entorhinal               | -0.09 | 0.09 | -1.02 | -0.28 - 0.09 | $3.10 \times 10^{-1}$ | $3.720 \times 10^{-1}$                   | 31.74 | 1069 | 296 |
| R_medialorbitofrontal      | -0.07 | 0.06 | -1.22 | -0.19 - 0.04 | $2.23 \times 10^{-1}$ | $2.882 \times 10^{-1}$                   | 0.00  | 1348 | 410 |
| R_middletemporal           | -0.07 | 0.08 | -0.82 | -0.23 - 0.09 | $4.13 \times 10^{-1}$ | $4.688 \times 10^{-1}$                   | 32.68 | 1336 | 410 |
| L_frontalpole              | -0.06 | 0.06 | -1.05 | -0.18 - 0.05 | $2.96 \times 10^{-1}$ | $3.603 \times 10^{-1}$                   | 0.00  | 1343 | 410 |
| L_lateralorbitofrontal     | -0.06 | 0.07 | -0.82 | -0.2 - 0.08  | $4.11 \times 10^{-1}$ | $4.688 \times 10^{-1}$                   | 19.52 | 1343 | 412 |
| R_caudalanteriorcingulate  | -0.06 | 0.11 | -0.56 | -0.27 - 0.15 | $5.76 \times 10^{-1}$ | $6.164 \times 10^{-1}$                   | 60.23 | 1346 | 411 |
| R_inferiortemporal         | -0.05 | 0.07 | -0.64 | -0.19 - 0.1  | $5.22 \times 10^{-1}$ | $5.695 \times 10^{-1}$                   | 21.85 | 1346 | 412 |
| R_temporalpole             | -0.03 | 0.06 | -0.55 | -0.15 - 0.08 | $5.86 \times 10^{-1}$ | $6.164 \times 10^{-1}$                   | 0.00  | 1344 | 410 |
| L_isthmuscingulate         | -0.02 | 0.08 | -0.26 | -0.18 - 0.13 | $7.91 \times 10^{-1}$ | $8.103 \times 10^{-1}$                   | 29.21 | 1343 | 411 |
| L_posteriorcingulate       | -0.01 | 0.06 | -0.20 | -0.13 - 0.11 | $8.45 \times 10^{-1}$ | $8.552 \times 10^{-1}$                   | 0.00  | 1344 | 411 |
| R_isthmuscingulate         | -0.01 | 0.08 | -0.09 | -0.17 - 0.15 | $9.31 \times 10^{-1}$ | $9.310 \times 10^{-1}$                   | 33.62 | 1345 | 411 |
| L_medialorbitofrontal      | 0.04  | 0.08 | 0.51  | -0.12 - 0.2  | $6.13 \times 10^{-1}$ | $6.357 \times 10^{-1}$                   | 33.86 | 1344 | 412 |
| L_rostralanteriorcingulate | 0.06  | 0.07 | 0.86  | -0.08 - 0.2  | $3.88 \times 10^{-1}$ | $4.527 \times 10^{-1}$                   | 15.87 | 1342 | 411 |
| R_insula                   | 0.07  | 0.06 | 1.14  | -0.05 - 0.19 | $2.54 \times 10^{-1}$ | $3.138 \times 10^{-1}$                   | 0.00  | 1323 | 405 |
| L_insula                   | 0.15  | 0.08 | 1.93  | 0 - 0.31     | $5.31 \times 10^{-2}$ | $8.578 \times 10^{-2}$                   | 29.34 | 1320 | 402 |
| L_caudalanteriorcingulate  | 0.18  | 0.06 | 3.02  | 0.06 - 0.3   | $2.55 \times 10^{-3}$ | <b><math>7.140 \times 10^{-3}</math></b> | 0.00  | 1343 | 411 |
| R_rostralanteriorcingulate | 0.20  | 0.06 | 3.33  | 0.08 - 0.32  | $8.80 \times 10^{-4}$ | <b><math>2.957 \times 10^{-3}</math></b> | 0.00  | 1348 | 411 |

**Abbreviations:** SE, standard error; CI, confidence interval;  $I^2$ , heterogeneity index. Abbreviations for all cortical brain regions are provided in Supplementary Table 4. Uncorrected  $p$ -values are reported. Brain regions are ranked according to effect size (negative to positive).  $P$ -values were compared to an adjusted alpha level of  $p < 1.49 \times 10^{-4}$ . Significant brain regions are highlighted in red with an asterisk (\*).



**Supplementary Table 33.** Full list of case-versus-control effect sizes for cortical thickness differences, including non-significant findings | 'MTLE-R' phenotype

| Structure                    | Cohen's <i>d</i> | SE          | Z score      | 95% CI               | <i>P</i> value               | FDR-adjusted <i>P</i> value | <i>r</i> <sup>2</sup> | Number of controls | Number of cases |
|------------------------------|------------------|-------------|--------------|----------------------|------------------------------|-----------------------------|-----------------------|--------------------|-----------------|
| <b>R_precentral*</b>         | <b>-0.52</b>     | <b>0.09</b> | <b>-6.07</b> | <b>-0.69 - -0.35</b> | <b>1.25x10<sup>-9</sup></b>  | <b>2.10X10<sup>-8</sup></b> | <b>33.29</b>          | <b>1293</b>        | <b>337</b>      |
| <b>L_paracental*</b>         | <b>-0.50</b>     | <b>0.10</b> | <b>-4.94</b> | <b>-0.7 - -0.3</b>   | <b>7.67x10<sup>-7</sup></b>  | <b>9.20X10<sup>-6</sup></b> | <b>52.28</b>          | <b>1292</b>        | <b>338</b>      |
| R_superiorparietal           | -0.49            | 0.17        | -2.80        | -0.83 - -0.15        | 5.03x10 <sup>-3</sup>        | 1.62X10 <sup>-2</sup>       | 83.96                 | 1295               | 338             |
| R_precuneus                  | -0.46            | 0.12        | -3.74        | -0.7 - -0.22         | 1.87x10 <sup>-4</sup>        | 1.09X10 <sup>-3</sup>       | 67.50                 | 1296               | 338             |
| <b>R_paracental*</b>         | <b>-0.42</b>     | <b>0.06</b> | <b>-6.54</b> | <b>-0.55 - -0.3</b>  | <b>6.24x10<sup>-11</sup></b> | <b>1.31X10<sup>-9</sup></b> | <b>0.41</b>           | <b>1296</b>        | <b>338</b>      |
| <b>L_precentral*</b>         | <b>-0.42</b>     | <b>0.09</b> | <b>-4.60</b> | <b>-0.59 - -0.24</b> | <b>4.31x10<sup>-6</sup></b>  | <b>4.02X10<sup>-5</sup></b> | <b>40.04</b>          | <b>1287</b>        | <b>338</b>      |
| L_superiorparietal           | -0.40            | 0.12        | -3.22        | -0.65 - -0.16        | 1.27x10 <sup>-3</sup>        | 5.08X10 <sup>-3</sup>       | 68.40                 | 1289               | 338             |
| L_lingual                    | -0.38            | 0.14        | -2.79        | -0.65 - -0.11        | 5.22x10 <sup>-3</sup>        | 1.62X10 <sup>-2</sup>       | 74.27                 | 1291               | 338             |
| L_precuneus                  | -0.38            | 0.11        | -3.41        | -0.6 - -0.16         | 6.47x10 <sup>-4</sup>        | 2.72X10 <sup>-3</sup>       | 61.08                 | 1291               | 338             |
| R_lateraloccipital           | -0.37            | 0.10        | -3.75        | -0.56 - -0.17        | 1.79x10 <sup>-4</sup>        | 1.09X10 <sup>-3</sup>       | 48.50                 | 1295               | 338             |
| L_supramarginal              | -0.36            | 0.10        | -3.69        | -0.55 - -0.17        | 2.25x10 <sup>-4</sup>        | 1.16X10 <sup>-3</sup>       | 46.34                 | 1248               | 321             |
| R_postcentral                | -0.36            | 0.15        | -2.35        | -0.66 - -0.06        | 1.87x10 <sup>-2</sup>        | 4.36X10 <sup>-2</sup>       | 79.09                 | 1292               | 338             |
| L_superiorfrontal            | <b>-0.35</b>     | <b>0.09</b> | <b>-3.78</b> | <b>-0.54 - -0.17</b> | <b>1.59x10<sup>-4</sup></b>  | <b>1.09X10<sup>-3</sup></b> | <b>43.90</b>          | <b>1291</b>        | <b>337</b>      |
| L_postcentral                | -0.33            | 0.15        | -2.25        | -0.62 - -0.04        | 2.43x10 <sup>-2</sup>        | 5.23X10 <sup>-2</sup>       | 77.84                 | 1289               | 338             |
| <b>L_transversetemporal*</b> | <b>-0.31</b>     | <b>0.07</b> | <b>-4.25</b> | <b>-0.46 - -0.17</b> | <b>2.15x10<sup>-5</sup></b>  | <b>1.81X10<sup>-4</sup></b> | <b>15.61</b>          | <b>1289</b>        | <b>338</b>      |
| R_caudalmiddlefrontal        | -0.31            | 0.08        | -3.61        | -0.47 - -0.14        | 3.03x10 <sup>-4</sup>        | 1.41X10 <sup>-3</sup>       | 32.66                 | 1296               | 338             |
| L_caudalmiddlefrontal        | -0.30            | 0.10        | -3.07        | -0.49 - -0.11        | 2.15x10 <sup>-3</sup>        | 8.21X10 <sup>-3</sup>       | 48.96                 | 1292               | 338             |
| R_superiorfrontal            | -0.30            | 0.12        | -2.53        | -0.53 - -0.07        | 1.14x10 <sup>-2</sup>        | 3.09X10 <sup>-2</sup>       | 64.86                 | 1293               | 338             |
| L_cuneus                     | -0.29            | 0.14        | -2.10        | -0.55 - -0.02        | 3.58x10 <sup>-2</sup>        | 7.16X10 <sup>-2</sup>       | 74.04                 | 1290               | 338             |
| R_temporalpole               | -0.28            | 0.10        | -2.73        | -0.48 - -0.08        | 6.41x10 <sup>-3</sup>        | 1.79X10 <sup>-2</sup>       | 53.29                 | 1291               | 333             |
| R_lingual                    | -0.28            | 0.08        | -3.68        | -0.43 - -0.13        | 2.35x10 <sup>-4</sup>        | 1.16X10 <sup>-3</sup>       | 19.15                 | 1295               | 338             |

|                           |              |             |              |                      |                             |                  |              |             |            |
|---------------------------|--------------|-------------|--------------|----------------------|-----------------------------|------------------|--------------|-------------|------------|
| R_supramarginal           | -0.27        | 0.10        | -2.73        | -0.47 - -0.08        | 6.33x10 <sup>-3</sup>       | <b>1.79X10-2</b> | 50.10        | 1240        | 326        |
| <b>R_parsopercularis*</b> | <b>-0.27</b> | <b>0.07</b> | <b>-3.80</b> | <b>-0.41 - -0.13</b> | <b>1.45x10<sup>-4</sup></b> | <b>1.09X10-3</b> | <b>12.11</b> | <b>1295</b> | <b>338</b> |
| L_pericalcarine           | -0.26        | 0.16        | -1.58        | -0.58 - 0.06         | 1.14x10 <sup>-1</sup>       | 1.77X10-1        | 81.95        | 1292        | 338        |
| L_lateraloccipital        | -0.25        | 0.12        | -2.03        | -0.49 - -0.01        | 4.25x10 <sup>-2</sup>       | 8.11X10-2        | 68.39        | 1292        | 338        |
| R_cuneus                  | -0.25        | 0.08        | -2.94        | -0.41 - -0.08        | 3.31x10 <sup>-3</sup>       | <b>1.21X10-2</b> | 32.45        | 1293        | 338        |
| R_inferiorparietal        | -0.24        | 0.14        | -1.73        | -0.52 - 0.03         | 8.41x10 <sup>-2</sup>       | 1.36X10-1        | 75.92        | 1285        | 338        |
| R_transversetemporal      | -0.24        | 0.06        | -3.73        | -0.36 - -0.11        | 1.94x10 <sup>-4</sup>       | <b>1.09X10-3</b> | 0.00         | 1296        | 338        |
| L_inferiorparietal        | -0.24        | 0.13        | -1.88        | -0.48 - 0.01         | 6.04x10 <sup>-2</sup>       | 1.01X10-1        | 69.21        | 1281        | 336        |
| R_pericalcarine           | -0.23        | 0.08        | -2.85        | -0.39 - -0.07        | 4.39x10 <sup>-3</sup>       | <b>1.48X10-2</b> | 26.42        | 1296        | 338        |
| R_superiortemporal        | -0.23        | 0.10        | -2.29        | -0.42 - -0.03        | 2.21x10 <sup>-2</sup>       | 5.02X10-2        | 48.26        | 1197        | 322        |
| L_bankssts                | -0.22        | 0.15        | -1.46        | -0.51 - 0.08         | 1.44x10 <sup>-1</sup>       | 2.03X10-1        | 77.76        | 1228        | 322        |
| L_parsorbitalis           | -0.19        | 0.10        | -1.94        | -0.38 - 0            | 5.27x10 <sup>-2</sup>       | 9.75X10-2        | 48.79        | 1292        | 338        |
| R_entorhinal              | -0.18        | 0.10        | -1.80        | -0.38 - 0.02         | 7.23x10 <sup>-2</sup>       | 1.19X10-1        | 35.11        | 1017        | 240        |
| R_bankssts                | -0.18        | 0.09        | -1.92        | -0.36 - 0            | 5.48x10 <sup>-2</sup>       | 9.75X10-2        | 43.51        | 1263        | 333        |
| R parahippocampal         | -0.18        | 0.06        | -2.75        | -0.3 - -0.05         | 6.05x10 <sup>-3</sup>       | <b>1.79X10-2</b> | 0.00         | 1292        | 338        |
| R_fusiform                | -0.17        | 0.08        | -2.24        | -0.32 - -0.02        | 2.51x10 <sup>-2</sup>       | 5.27X10-2        | 18.62        | 1292        | 338        |
| R_parstriangularis        | -0.17        | 0.09        | -1.93        | -0.33 - 0            | 5.41x10 <sup>-2</sup>       | 9.75X10-2        | 34.31        | 1294        | 337        |
| L_fusiform                | -0.16        | 0.06        | -2.52        | -0.29 - -0.04        | 1.18x10 <sup>-2</sup>       | <b>3.10X10-2</b> | 0.00         | 1287        | 337        |
| R_middletemporal          | -0.16        | 0.11        | -1.47        | -0.38 - 0.05         | 1.41x10 <sup>-1</sup>       | 2.03X10-1        | 59.15        | 1284        | 337        |
| L_rostralmiddlefrontal    | -0.16        | 0.12        | -1.27        | -0.4 - 0.08          | 2.04x10 <sup>-1</sup>       | 2.76X10-1        | 67.51        | 1292        | 337        |
| R_parsorbitalis           | -0.15        | 0.16        | -0.99        | -0.46 - 0.15         | 3.20x10 <sup>-1</sup>       | 3.95X10-1        | 80.30        | 1296        | 338        |
| L_parsopercularis         | -0.15        | 0.10        | -1.47        | -0.36 - 0.05         | 1.43x10 <sup>-1</sup>       | 2.03X10-1        | 55.57        | 1290        | 338        |
| L_parstriangularis        | -0.15        | 0.10        | -1.46        | -0.35 - 0.05         | 1.43x10 <sup>-1</sup>       | 2.03X10-1        | 54.17        | 1292        | 338        |
| L_temporalpole            | -0.15        | 0.07        | -2.04        | -0.29 - -0.01        | 4.16x10 <sup>-2</sup>       | 8.11X10-2        | 13.08        | 1287        | 337        |
| L_superiortemporal        | -0.14        | 0.12        | -1.11        | -0.38 - 0.11         | 2.67x10 <sup>-1</sup>       | 3.56X10-1        | 66.85        | 1177        | 315        |
| L_entorhinal              | -0.11        | 0.08        | -1.51        | -0.26 - 0.03         | 1.31x10 <sup>-1</sup>       | 2.00X10-1        | 0.00         | 1050        | 252        |
| L_middletemporal          | -0.11        | 0.11        | -1.01        | -0.33 - 0.11         | 3.13x10 <sup>-1</sup>       | 3.92X10-1        | 59.15        | 1190        | 320        |

|                            |       |      |       |              |                       |                             |       |      |     |
|----------------------------|-------|------|-------|--------------|-----------------------|-----------------------------|-------|------|-----|
| R_inferiortemporal         | -0.11 | 0.10 | -1.09 | -0.31 - 0.09 | 2.77x10 <sup>-1</sup> | 3.64X10 <sup>-1</sup>       | 53.35 | 1294 | 338 |
| R_insula                   | -0.11 | 0.10 | -1.06 | -0.31 - 0.09 | 2.89x10 <sup>-1</sup> | 3.73X10 <sup>-1</sup>       | 53.43 | 1257 | 333 |
| R_posteriorcingulate       | -0.09 | 0.10 | -0.83 | -0.29 - 0.12 | 4.07x10 <sup>-1</sup> | 4.75X10 <sup>-1</sup>       | 55.26 | 1296 | 337 |
| L_frontalpole              | -0.08 | 0.09 | -0.89 | -0.25 - 0.09 | 3.71x10 <sup>-1</sup> | 4.39X10 <sup>-1</sup>       | 36.44 | 1290 | 338 |
| L_inferiortemporal         | -0.06 | 0.06 | -0.92 | -0.18 - 0.07 | 3.59x10 <sup>-1</sup> | 4.37X10 <sup>-1</sup>       | 0.01  | 1290 | 338 |
| L_posteriorcingulate       | -0.06 | 0.06 | -0.90 | -0.18 - 0.07 | 3.70x10 <sup>-1</sup> | 4.39X10 <sup>-1</sup>       | 0.00  | 1292 | 338 |
| R_frontalpole              | -0.03 | 0.10 | -0.29 | -0.23 - 0.17 | 7.76x10 <sup>-1</sup> | 8.37X10 <sup>-1</sup>       | 51.78 | 1296 | 338 |
| R_rostralmiddlefrontal     | -0.03 | 0.10 | -0.25 | -0.23 - 0.18 | 8.04x10 <sup>-1</sup> | 8.55X10 <sup>-1</sup>       | 55.61 | 1296 | 338 |
| L_insula                   | -0.02 | 0.06 | -0.36 | -0.15 - 0.1  | 7.17x10 <sup>-1</sup> | 8.03X10 <sup>-1</sup>       | 0.00  | 1254 | 332 |
| L_caudalanteriorcingulate  | -0.02 | 0.08 | -0.28 | -0.17 - 0.13 | 7.77x10 <sup>-1</sup> | 8.37X10 <sup>-1</sup>       | 23.29 | 1287 | 337 |
| L_lateralorbitofrontal     | -0.02 | 0.08 | -0.23 | -0.17 - 0.13 | 8.20x10 <sup>-1</sup> | 8.56X10 <sup>-1</sup>       | 21.73 | 1288 | 338 |
| L parahippocampal          | -0.02 | 0.08 | -0.19 | -0.18 - 0.15 | 8.52x10 <sup>-1</sup> | 8.62X10 <sup>-1</sup>       | 29.23 | 1283 | 337 |
| L_rostralanteriorcingulate | 0.00  | 0.09 | 0.03  | -0.18 - 0.18 | 9.73x10 <sup>-1</sup> | 9.73X10 <sup>-1</sup>       | 41.58 | 1287 | 335 |
| R_lateralorbitofrontal     | 0.03  | 0.08 | 0.34  | -0.13 - 0.18 | 7.36x10 <sup>-1</sup> | 8.13X10 <sup>-1</sup>       | 22.24 | 1293 | 338 |
| R_caudalanteriorcingulate  | 0.06  | 0.12 | 0.50  | -0.18 - 0.3  | 6.17x10 <sup>-1</sup> | 7.00X10 <sup>-1</sup>       | 66.90 | 1294 | 337 |
| L_isthmuscingulate         | 0.08  | 0.08 | 1.03  | -0.07 - 0.24 | 3.05x10 <sup>-1</sup> | 3.88X10 <sup>-1</sup>       | 25.30 | 1291 | 338 |
| L_medialorbitofrontal      | 0.08  | 0.06 | 1.29  | -0.04 - 0.21 | 1.98x10 <sup>-1</sup> | 2.73X10 <sup>-1</sup>       | 0.00  | 1274 | 336 |
| R_isthmuscingulate         | 0.14  | 0.10 | 1.46  | -0.05 - 0.34 | 1.45x10 <sup>-1</sup> | 2.03X10 <sup>-1</sup>       | 50.11 | 1293 | 338 |
| R_medialorbitofrontal      | 0.15  | 0.09 | 1.63  | -0.03 - 0.32 | 1.02x10 <sup>-1</sup> | 1.62X10 <sup>-1</sup>       | 40.09 | 1278 | 336 |
| R_rostralanteriorcingulate | 0.25  | 0.11 | 2.40  | 0.05 - 0.46  | 1.63x10 <sup>-2</sup> | <b>4.03X10<sup>-2</sup></b> | 56.47 | 1296 | 337 |

**Abbreviations:** SE, standard error; CI, confidence interval;  $I^2$ , heterogeneity index. Abbreviations for all cortical brain regions are provided in Supplementary Table 4. Uncorrected  $p$ -values are reported. Brain regions are ranked according to effect size (negative to positive).  $P$ -values were compared to an adjusted alpha level of  $p < 1.49 \times 10^{-4}$ . Significant brain regions are **highlighted in red with an asterisk (\*)**.

**Supplementary Table 34.** Full list of case-versus-control effect sizes for cortical thickness differences, including non-significant findings | 'IGE' phenotype

| Structure              | Cohen's <i>d</i> | SE          | Z score      | 95% CI               | <i>P</i> value              | FDR-adjusted <i>P</i> value | <i>f</i> <sup>2</sup> | Number of controls | Number of cases |
|------------------------|------------------|-------------|--------------|----------------------|-----------------------------|-----------------------------|-----------------------|--------------------|-----------------|
| <b>R_precentral*</b>   | <b>-0.39</b>     | <b>0.07</b> | <b>-5.44</b> | <b>-0.53 - -0.25</b> | <b>5.27x10<sup>-8</sup></b> | <b>4.4X10<sup>-6</sup></b>  | <b>0.01</b>           | <b>1044</b>        | <b>295</b>      |
| <b>L_precentral*</b>   | <b>-0.34</b>     | <b>0.07</b> | <b>-4.78</b> | <b>-0.48 - -0.2</b>  | <b>1.75x10<sup>-6</sup></b> | <b>7.4X10<sup>-5</sup></b>  | <b>0.00</b>           | <b>1043</b>        | <b>297</b>      |
| R_temporalpole         | -0.28            | 0.09        | -2.99        | -0.46 - -0.09        | 2.82x10 <sup>-3</sup>       | <b>2.8X10<sup>-2</sup></b>  | 33.03                 | 1045               | 296             |
| L_caudalmiddlefrontal  | -0.20            | 0.07        | -2.80        | -0.34 - -0.06        | 5.08x10 <sup>-3</sup>       | <b>4.0X10<sup>-2</sup></b>  | 1.52                  | 1047               | 297             |
| L_entorhinal           | -0.19            | 0.08        | -2.30        | -0.35 - -0.03        | 2.15x10 <sup>-2</sup>       | 1.2X10 <sup>-1</sup>        | 0.00                  | 820                | 242             |
| L_paracental           | -0.18            | 0.07        | -2.50        | -0.32 - -0.04        | 1.25x10 <sup>-2</sup>       | 8.8X10 <sup>-2</sup>        | 0.00                  | 1047               | 297             |
| R_caudalmiddlefrontal  | -0.17            | 0.09        | -1.83        | -0.36 - 0.01         | 6.66x10 <sup>-2</sup>       | 2.7X10 <sup>-1</sup>        | 36.20                 | 1048               | 297             |
| L_temporalpole         | -0.17            | 0.08        | -2.00        | -0.33 - 0            | 4.53x10 <sup>-2</sup>       | 2.2X10 <sup>-1</sup>        | 20.13                 | 1041               | 297             |
| R_entorhinal           | -0.15            | 0.13        | -1.14        | -0.41 - 0.11         | 2.54x10 <sup>-1</sup>       | 5.5X10 <sup>-1</sup>        | 55.22                 | 810                | 240             |
| L_supramarginal        | -0.14            | 0.08        | -1.84        | -0.3 - 0.01          | 6.57x10 <sup>-2</sup>       | 2.7X10 <sup>-1</sup>        | 6.04                  | 1003               | 274             |
| R_superiorparietal     | -0.13            | 0.07        | -1.89        | -0.27 - 0            | 5.81x10 <sup>-2</sup>       | 2.7X10 <sup>-1</sup>        | 0.00                  | 1048               | 297             |
| L_superiorparietal     | -0.13            | 0.09        | -1.56        | -0.3 - 0.03          | 1.18x10 <sup>-1</sup>       | 4.1X10 <sup>-1</sup>        | 24.25                 | 1045               | 297             |
| R_paracental           | -0.13            | 0.10        | -1.32        | -0.33 - 0.06         | 1.86x10 <sup>-1</sup>       | 4.7X10 <sup>-1</sup>        | 43.15                 | 1049               | 297             |
| L_inferiorparietal     | -0.13            | 0.09        | -1.43        | -0.3 - 0.05          | 1.52x10 <sup>-1</sup>       | 4.5X10 <sup>-1</sup>        | 28.42                 | 1036               | 297             |
| L_lateraloccipital     | -0.13            | 0.15        | -0.83        | -0.42 - 0.17         | 4.05x10 <sup>-1</sup>       | 7.2X10 <sup>-1</sup>        | 74.54                 | 1047               | 296             |
| R_parsorbitalis        | -0.12            | 0.07        | -1.71        | -0.26 - 0.02         | 8.70x10 <sup>-2</sup>       | 3.2X10 <sup>-1</sup>        | 0.00                  | 1049               | 297             |
| L_middletemporal       | -0.11            | 0.07        | -1.52        | -0.26 - 0.03         | 1.28x10 <sup>-1</sup>       | 4.3X10 <sup>-1</sup>        | 0.00                  | 963                | 279             |
| L_fusiform             | -0.11            | 0.09        | -1.15        | -0.29 - 0.08         | 2.50x10 <sup>-1</sup>       | 5.5X10 <sup>-1</sup>        | 34.99                 | 1044               | 296             |
| R_lateralorbitofrontal | -0.11            | 0.07        | -1.51        | -0.25 - 0.03         | 1.32x10 <sup>-1</sup>       | 4.3X10 <sup>-1</sup>        | 0.00                  | 1046               | 297             |
| R_medialorbitofrontal  | -0.11            | 0.07        | -1.48        | -0.25 - 0.03         | 1.39x10 <sup>-1</sup>       | 4.3X10 <sup>-1</sup>        | 0.00                  | 1031               | 292             |
| L_transversetemporal   | -0.10            | 0.07        | -1.42        | -0.24 - 0.04         | 1.56x10 <sup>-1</sup>       | 4.5X10 <sup>-1</sup>        | 0.00                  | 1044               | 297             |
| R_superiorfrontal      | -0.10            | 0.08        | -1.21        | -0.26 - 0.06         | 2.27x10 <sup>-1</sup>       | 5.4X10 <sup>-1</sup>        | 19.57                 | 1045               | 297             |

|                            |       |      |       |              |                       |                      |       |      |     |
|----------------------------|-------|------|-------|--------------|-----------------------|----------------------|-------|------|-----|
| R_inferiortemporal         | -0.09 | 0.07 | -1.33 | -0.23 - 0.04 | $1.84 \times 10^{-1}$ | $4.7 \times 10^{-1}$ | 0.00  | 1047 | 297 |
| R_precuneus                | -0.09 | 0.08 | -1.18 | -0.24 - 0.06 | $2.39 \times 10^{-1}$ | $5.4 \times 10^{-1}$ | 12.37 | 1049 | 297 |
| L_cuneus                   | -0.09 | 0.10 | -0.96 | -0.28 - 0.1  | $3.38 \times 10^{-1}$ | $6.8 \times 10^{-1}$ | 37.23 | 1045 | 297 |
| R_parsopercularis          | -0.08 | 0.07 | -1.18 | -0.22 - 0.06 | $2.37 \times 10^{-1}$ | $5.4 \times 10^{-1}$ | 0.00  | 1047 | 297 |
| R_cuneus                   | -0.08 | 0.08 | -0.99 | -0.24 - 0.08 | $3.25 \times 10^{-1}$ | $6.7 \times 10^{-1}$ | 16.96 | 1047 | 297 |
| L_bankssts                 | -0.08 | 0.11 | -0.67 | -0.3 - 0.15  | $5.03 \times 10^{-1}$ | $8.0 \times 10^{-1}$ | 52.46 | 1014 | 272 |
| R_pericalcarine            | -0.07 | 0.12 | -0.63 | -0.3 - 0.15  | $5.26 \times 10^{-1}$ | $8.2 \times 10^{-1}$ | 57.30 | 1049 | 296 |
| R_transversetemporal       | -0.07 | 0.10 | -0.71 | -0.27 - 0.13 | $4.76 \times 10^{-1}$ | $7.8 \times 10^{-1}$ | 43.52 | 1049 | 297 |
| R_supramarginal            | -0.07 | 0.08 | -0.93 | -0.22 - 0.08 | $3.51 \times 10^{-1}$ | $6.8 \times 10^{-1}$ | 0.00  | 993  | 270 |
| R_middletemporal           | -0.07 | 0.07 | -0.92 | -0.2 - 0.07  | $3.58 \times 10^{-1}$ | $6.8 \times 10^{-1}$ | 0.00  | 1042 | 296 |
| L_insula                   | -0.06 | 0.07 | -0.88 | -0.2 - 0.08  | $3.78 \times 10^{-1}$ | $7.0 \times 10^{-1}$ | 0.01  | 1008 | 293 |
| R_lingual                  | -0.06 | 0.10 | -0.59 | -0.26 - 0.14 | $5.54 \times 10^{-1}$ | $8.2 \times 10^{-1}$ | 44.32 | 1048 | 296 |
| R_lateraloccipital         | -0.05 | 0.13 | -0.35 | -0.31 - 0.21 | $7.23 \times 10^{-1}$ | $8.9 \times 10^{-1}$ | 67.05 | 1048 | 297 |
| R_rostralmiddlefrontal     | -0.05 | 0.07 | -0.62 | -0.19 - 0.1  | $5.35 \times 10^{-1}$ | $8.2 \times 10^{-1}$ | 6.69  | 1049 | 297 |
| L_pericalcarine            | -0.04 | 0.10 | -0.43 | -0.25 - 0.16 | $6.67 \times 10^{-1}$ | $8.8 \times 10^{-1}$ | 46.90 | 1047 | 297 |
| L_inferiortemporal         | -0.04 | 0.08 | -0.46 | -0.2 - 0.12  | $6.45 \times 10^{-1}$ | $8.8 \times 10^{-1}$ | 20.41 | 1046 | 296 |
| L_rostralanteriorcingulate | -0.04 | 0.11 | -0.35 | -0.25 - 0.17 | $7.24 \times 10^{-1}$ | $8.9 \times 10^{-1}$ | 49.26 | 1042 | 294 |
| L_precuneus                | -0.04 | 0.08 | -0.43 | -0.2 - 0.13  | $6.66 \times 10^{-1}$ | $8.8 \times 10^{-1}$ | 19.43 | 1046 | 297 |
| R_insula                   | -0.03 | 0.07 | -0.42 | -0.17 - 0.11 | $6.74 \times 10^{-1}$ | $8.8 \times 10^{-1}$ | 0.00  | 1010 | 290 |
| R_inferiorparietal         | -0.03 | 0.09 | -0.30 | -0.2 - 0.14  | $7.61 \times 10^{-1}$ | $9.0 \times 10^{-1}$ | 26.09 | 1038 | 293 |
| R_rostralanteriorcingulate | -0.03 | 0.08 | -0.32 | -0.18 - 0.13 | $7.47 \times 10^{-1}$ | $9.0 \times 10^{-1}$ | 16.78 | 1047 | 297 |
| L_superiortemporal         | -0.03 | 0.10 | -0.25 | -0.22 - 0.17 | $7.99 \times 10^{-1}$ | $9.1 \times 10^{-1}$ | 36.07 | 944  | 266 |
| L_parsopercularis          | -0.02 | 0.11 | -0.22 | -0.24 - 0.19 | $8.23 \times 10^{-1}$ | $9.1 \times 10^{-1}$ | 50.93 | 1046 | 297 |
| R_parstriangularis         | -0.02 | 0.07 | -0.30 | -0.16 - 0.12 | $7.63 \times 10^{-1}$ | $9.0 \times 10^{-1}$ | 0.00  | 1047 | 297 |
| L_frontalpole              | -0.02 | 0.09 | -0.20 | -0.19 - 0.15 | $8.40 \times 10^{-1}$ | $9.1 \times 10^{-1}$ | 25.35 | 1045 | 297 |
| L_parstriangularis         | -0.01 | 0.08 | -0.19 | -0.17 - 0.14 | $8.51 \times 10^{-1}$ | $9.1 \times 10^{-1}$ | 10.44 | 1047 | 297 |
| L_superiorfrontal          | -0.01 | 0.08 | -0.19 | -0.16 - 0.13 | $8.53 \times 10^{-1}$ | $9.1 \times 10^{-1}$ | 7.27  | 1046 | 297 |

|                           |      |      |       |              |                       |                      |       |      |     |
|---------------------------|------|------|-------|--------------|-----------------------|----------------------|-------|------|-----|
| L_lingual                 | 0.00 | 0.10 | -0.03 | -0.19 - 0.19 | 9.72x10 <sup>-1</sup> | 9.9X10 <sup>-1</sup> | 39.38 | 1046 | 297 |
| L_medialorbitofrontal     | 0.00 | 0.07 | -0.02 | -0.14 - 0.14 | 9.84x10 <sup>-1</sup> | 9.9X10 <sup>-1</sup> | 0.01  | 1029 | 293 |
| R parahippocampal         | 0.00 | 0.07 | 0.01  | -0.14 - 0.14 | 9.89x10 <sup>-1</sup> | 9.9X10 <sup>-1</sup> | 0.00  | 1045 | 293 |
| L_parsorbitalis           | 0.00 | 0.07 | 0.03  | -0.14 - 0.14 | 9.77x10 <sup>-1</sup> | 9.9X10 <sup>-1</sup> | 0.00  | 1047 | 296 |
| L_isthmuscingulate        | 0.00 | 0.11 | 0.04  | -0.21 - 0.22 | 9.68x10 <sup>-1</sup> | 9.9X10 <sup>-1</sup> | 49.72 | 1046 | 296 |
| L_rostralmiddlefrontal    | 0.02 | 0.09 | 0.22  | -0.15 - 0.19 | 8.30x10 <sup>-1</sup> | 9.1X10 <sup>-1</sup> | 24.37 | 1046 | 295 |
| R_isthmuscingulate        | 0.02 | 0.10 | 0.21  | -0.18 - 0.22 | 8.37x10 <sup>-1</sup> | 9.1X10 <sup>-1</sup> | 44.09 | 1046 | 297 |
| R_fusiform                | 0.03 | 0.10 | 0.26  | -0.17 - 0.22 | 7.96x10 <sup>-1</sup> | 9.1X10 <sup>-1</sup> | 39.10 | 1049 | 296 |
| L_posteriorcingulate      | 0.03 | 0.09 | 0.36  | -0.14 - 0.2  | 7.23x10 <sup>-1</sup> | 8.9X10 <sup>-1</sup> | 28.25 | 1047 | 297 |
| R_frontalpole             | 0.04 | 0.07 | 0.55  | -0.1 - 0.18  | 5.82x10 <sup>-1</sup> | 8.4X10 <sup>-1</sup> | 0.00  | 1049 | 297 |
| L parahippocampal         | 0.04 | 0.09 | 0.44  | -0.14 - 0.22 | 6.60x10 <sup>-1</sup> | 8.8X10 <sup>-1</sup> | 30.33 | 1038 | 294 |
| R_superiortemporal        | 0.04 | 0.10 | 0.43  | -0.15 - 0.24 | 6.71x10 <sup>-1</sup> | 8.8X10 <sup>-1</sup> | 34.28 | 955  | 265 |
| R_caudalanteriorcingulate | 0.05 | 0.09 | 0.61  | -0.12 - 0.22 | 5.44x10 <sup>-1</sup> | 8.2X10 <sup>-1</sup> | 25.74 | 1047 | 297 |
| L_postcentral             | 0.05 | 0.07 | 0.77  | -0.08 - 0.19 | 4.43x10 <sup>-1</sup> | 7.6X10 <sup>-1</sup> | 0.00  | 1044 | 296 |
| R_postcentral             | 0.06 | 0.09 | 0.66  | -0.11 - 0.23 | 5.07x10 <sup>-1</sup> | 8.0X10 <sup>-1</sup> | 25.80 | 1043 | 297 |
| R_posteriorcingulate      | 0.08 | 0.11 | 0.71  | -0.14 - 0.31 | 4.75x10 <sup>-1</sup> | 7.8X10 <sup>-1</sup> | 55.40 | 1049 | 296 |
| L_caudalanteriorcingulate | 0.09 | 0.08 | 1.03  | -0.08 - 0.25 | 3.02x10 <sup>-1</sup> | 6.3X10 <sup>-1</sup> | 21.80 | 1042 | 296 |
| L_lateralorbitofrontal    | 0.09 | 0.07 | 1.30  | -0.05 - 0.23 | 1.94x10 <sup>-1</sup> | 4.8X10 <sup>-1</sup> | 0.00  | 1042 | 297 |
| R_bankssts                | 0.10 | 0.12 | 0.82  | -0.13 - 0.33 | 4.10x10 <sup>-1</sup> | 7.2X10 <sup>-1</sup> | 56.54 | 1029 | 287 |

**Abbreviations:** SE, standard error; CI, confidence interval;  $I^2$ , heterogeneity index. Abbreviations for all cortical brain regions are provided in Supplementary Table 4. All uncorrected  $p$ -values are reported. Brain regions are ranked according to effect size (negative to positive).  $P$ -values were compared to an adjusted alpha level of  $p < 1.49 \times 10^{-4}$ . Significant brain regions are highlighted in red with an asterisk (\*).

**Supplementary Table 35.** Full list of case-versus-control effect sizes for cortical thickness differences, including non-significant findings | ‘All other epilepsies’ phenotype

| Structure                      | Cohen's <i>d</i> | SE    | Z score | 95% CI          | <i>P</i> value               | FDR-adjusted <i>P</i> value  | <i>r</i> <sup>2</sup> | Number of controls | Number of cases |
|--------------------------------|------------------|-------|---------|-----------------|------------------------------|------------------------------|-----------------------|--------------------|-----------------|
| <b>L_precentral*</b>           | -0.375           | 0.046 | -8.237  | -0.464 - -0.286 | <b>1.76x10<sup>-16</sup></b> | <b>1.48X10<sup>-14</sup></b> | 0.006                 | 1442               | 997             |
| <b>R_paracental*</b>           | -0.351           | 0.045 | -7.733  | -0.44 - -0.262  | <b>1.05x10<sup>-14</sup></b> | <b>4.41X10<sup>-13</sup></b> | 0.003                 | 1451               | 998             |
| <b>R_precentral*</b>           | -0.348           | 0.045 | -7.672  | -0.437 - -0.259 | <b>1.70x10<sup>-14</sup></b> | <b>4.76X10<sup>-13</sup></b> | 0.000                 | 1448               | 996             |
| <b>L_caudalmiddlefrontal*</b>  | -0.291           | 0.045 | -6.425  | -0.38 - -0.202  | <b>1.32x10<sup>-10</sup></b> | <b>2.22X10<sup>-9</sup></b>  | 0.000                 | 1447               | 1000            |
| <b>L_paracental*</b>           | -0.257           | 0.045 | -5.680  | -0.346 - -0.168 | <b>1.34x10<sup>-08</sup></b> | <b>1.88X10<sup>-7</sup></b>  | 0.000                 | 1447               | 1000            |
| <b>L_superiorfrontal*</b>      | -0.243           | 0.059 | -4.138  | -0.358 - -0.128 | <b>3.51x10<sup>-05</sup></b> | <b>1.55X10<sup>-4</sup></b>  | 34.545                | 1446               | 999             |
| <b>R_precuneus*</b>            | -0.238           | 0.053 | -4.471  | -0.343 - -0.134 | <b>7.78x10<sup>-06</sup></b> | <b>4.08X10<sup>-5</sup></b>  | 22.378                | 1451               | 994             |
| <b>R_superiorfrontal*</b>      | -0.235           | 0.052 | -4.489  | -0.337 - -0.132 | <b>7.15x10<sup>-06</sup></b> | <b>4.00X10<sup>-5</sup></b>  | 20.049                | 1448               | 997             |
| <b>R_cuneus*</b>               | -0.234           | 0.045 | -5.186  | -0.323 - -0.146 | <b>2.15x10<sup>-07</sup></b> | <b>2.58X10<sup>-6</sup></b>  | 0.000                 | 1449               | 996             |
| <b>L_superiorparietal*</b>     | -0.224           | 0.045 | -4.954  | -0.313 - -0.136 | <b>7.27x10<sup>-07</sup></b> | <b>6.79X10<sup>-6</sup></b>  | 0.001                 | 1444               | 996             |
| <b>R_superiorparietal*</b>     | -0.220           | 0.045 | -4.864  | -0.309 - -0.131 | <b>1.15x10<sup>-06</sup></b> | <b>9.66X10<sup>-6</sup></b>  | 0.002                 | 1450               | 997             |
| <b>R_caudalmiddlefrontal*</b>  | -0.212           | 0.045 | -4.699  | -0.301 - -0.124 | <b>2.62x10<sup>-06</sup></b> | <b>2.00X10<sup>-5</sup></b>  | 0.000                 | 1451               | 998             |
| <b>R_lateraloccipital*</b>     | -0.211           | 0.045 | -4.659  | -0.299 - -0.122 | <b>3.18x10<sup>-06</sup></b> | <b>2.15X10<sup>-5</sup></b>  | 0.003                 | 1450               | 997             |
| <b>R_parstriangularis*</b>     | -0.210           | 0.045 | -4.650  | -0.299 - -0.122 | <b>3.32x10<sup>-06</sup></b> | <b>2.15X10<sup>-5</sup></b>  | 0.003                 | 1449               | 998             |
| <b>R_supramarginal*</b>        | -0.206           | 0.047 | -4.418  | -0.297 - -0.115 | <b>9.95x10<sup>-06</sup></b> | <b>4.92X10<sup>-5</sup></b>  | 0.000                 | 1395               | 961             |
| <b>L_transversetemporal</b>    | -0.200           | 0.059 | -3.405  | -0.316 - -0.085 | 6.62x10 <sup>-04</sup>       | <b>2.14X10<sup>-3</sup></b>  | 34.852                | 1444               | 1000            |
| <b>R_rostralmiddlefrontal*</b> | -0.198           | 0.052 | -3.778  | -0.3 - -0.095   | 1.58x10 <sup>-04</sup>       | 5.31X10 <sup>-4</sup>        | 19.944                | 1451               | 997             |
| <b>R_entorhinal*</b>           | -0.197           | 0.058 | -3.378  | -0.312 - -0.083 | 7.30x10 <sup>-04</sup>       | <b>2.27X10<sup>-3</sup></b>  | 23.333                | 1183               | 901             |
| <b>R_transversetemporal*</b>   | -0.180           | 0.045 | -3.982  | -0.269 - -0.091 | <b>6.84x10<sup>-05</sup></b> | <b>2.85X10<sup>-4</sup></b>  | 0.012                 | 1451               | 998             |

|                               |        |       |        |                 |                   |                  |        |      |      |
|-------------------------------|--------|-------|--------|-----------------|-------------------|------------------|--------|------|------|
| <b>R_lingual*</b>             | -0.180 | 0.045 | -3.972 | -0.268 - -0.091 | <b>7.12x10-05</b> | <b>2.85X10-4</b> | 0.013  | 1450 | 996  |
| <b>L_precuneus*</b>           | -0.178 | 0.047 | -3.819 | -0.27 - -0.087  | <b>1.34x10-04</b> | <b>4.89X10-4</b> | 4.474  | 1446 | 998  |
| <b>R_lateralorbitofrontal</b> | -0.167 | 0.055 | -3.069 | -0.274 - -0.06  | 2.15x10-03        | <b>5.83X10-3</b> | 25.473 | 1448 | 996  |
| <b>L_pericalcarine</b>        | -0.160 | 0.054 | -2.957 | -0.266 - -0.054 | 3.10x10-03        | <b>7.89X10-3</b> | 24.415 | 1447 | 999  |
| <b>R_pericalcarine</b>        | -0.158 | 0.048 | -3.300 | -0.252 - -0.064 | 9.68x10-04        | <b>2.90X10-3</b> | 8.516  | 1451 | 997  |
| <b>R_parsorbitalis</b>        | -0.156 | 0.052 | -3.001 | -0.258 - -0.054 | 2.69x10-03        | <b>7.06X10-3</b> | 19.313 | 1451 | 996  |
| <b>L_lateraloccipital</b>     | -0.153 | 0.048 | -3.197 | -0.247 - -0.059 | 1.39x10-03        | <b>4.03X10-3</b> | 8.160  | 1447 | 1000 |
| <b>L_entorhinal</b>           | -0.149 | 0.084 | -1.770 | -0.314 - 0.016  | 0.077             | 1.22X10-1        | 61.910 | 1210 | 913  |
| <b>L_cuneus</b>               | -0.142 | 0.049 | -2.893 | -0.239 - -0.046 | 0.004             | <b>9.88X10-3</b> | 11.914 | 1445 | 1000 |
| <b>L_parstriangularis</b>     | -0.141 | 0.045 | -3.116 | -0.229 - -0.052 | 0.002             | <b>5.60X10-3</b> | 0.002  | 1447 | 1000 |
| <b>L_supramarginal</b>        | -0.138 | 0.059 | -2.346 | -0.254 - -0.023 | 0.019             | <b>3.80X10-2</b> | 31.971 | 1403 | 961  |
| <b>L_parsorbitalis</b>        | -0.128 | 0.045 | -2.840 | -0.216 - -0.04  | 0.005             | <b>1.20X10-2</b> | 0.005  | 1447 | 999  |
| <b>R_temporalpole</b>         | -0.126 | 0.047 | -2.680 | -0.218 - -0.034 | 0.007             | <b>1.63X10-2</b> | 5.439  | 1448 | 995  |
| <b>R_parsopercularis</b>      | -0.125 | 0.047 | -2.643 | -0.217 - -0.032 | 0.008             | <b>1.82X10-2</b> | 6.373  | 1450 | 998  |
| <b>L_parsopercularis</b>      | -0.122 | 0.047 | -2.578 | -0.215 - -0.029 | 0.010             | <b>2.21X10-2</b> | 6.861  | 1445 | 999  |
| <b>R_inferiorparietal</b>     | -0.118 | 0.050 | -2.372 | -0.216 - -0.021 | 0.018             | <b>3.73X10-2</b> | 13.162 | 1440 | 989  |
| <b>R_superiortemporal</b>     | -0.110 | 0.059 | -1.888 | -0.225 - 0.004  | 0.059             | 9.72X10-2        | 30.871 | 1354 | 959  |
| <b>R_middletemporal</b>       | -0.102 | 0.045 | -2.261 | -0.191 - -0.014 | 0.024             | <b>4.58X10-2</b> | 0.000  | 1440 | 993  |
| <b>R_medialorbitofrontal</b>  | -0.101 | 0.054 | -1.848 | -0.207 - 0.006  | 0.065             | 1.05X10-1        | 24.276 | 1433 | 973  |
| <b>L_lingual</b>              | -0.099 | 0.045 | -2.201 | -0.188 - -0.011 | 0.028             | 5.23X10-2        | 0.001  | 1446 | 1000 |
| <b>R_frontalpole</b>          | -0.098 | 0.045 | -2.170 | -0.186 - -0.009 | 0.030             | 5.48X10-2        | 0.002  | 1451 | 997  |
| <b>L_rostralmiddlefrontal</b> | -0.097 | 0.062 | -1.570 | -0.218 - 0.024  | 0.116             | 1.71X10-1        | 40.582 | 1447 | 999  |
| <b>L_inferiorparietal</b>     | -0.096 | 0.045 | -2.122 | -0.185 - -0.007 | 0.034             | 6.08X10-2        | 0.011  | 1436 | 995  |
| <b>L_fusiform</b>             | -0.095 | 0.045 | -2.106 | -0.184 - -0.007 | 0.035             | 6.13X10-2        | 0.002  | 1445 | 999  |
| <b>L_isthmuscingulate</b>     | -0.093 | 0.057 | -1.629 | -0.204 - 0.019  | 0.103             | 1.57X10-1        | 31.030 | 1446 | 998  |
| <b>L_superiortemporal</b>     | -0.092 | 0.059 | -1.543 | -0.208 - 0.025  | 0.123             | 1.78X10-1        | 32.164 | 1330 | 952  |
| <b>L_frontalpole</b>          | -0.089 | 0.046 | -1.954 | -0.179 - 0      | 0.051             | 8.57X10-2        | 2.096  | 1445 | 999  |



|                            |        |       |        |                |       |                       |        |      |     |
|----------------------------|--------|-------|--------|----------------|-------|-----------------------|--------|------|-----|
| L_posteriorcingulate       | -0.089 | 0.061 | -1.456 | -0.209 - 0.031 | 0.145 | 2.03X10 <sup>-1</sup> | 39.803 | 1447 | 999 |
| L_temporalpole             | -0.088 | 0.069 | -1.282 | -0.223 - 0.047 | 0.200 | 2.60X10 <sup>-1</sup> | 51.484 | 1442 | 997 |
| R_fusiform                 | -0.086 | 0.062 | -1.393 | -0.207 - 0.035 | 0.164 | 2.22X10 <sup>-1</sup> | 40.231 | 1451 | 997 |
| R_bankssts                 | -0.081 | 0.063 | -1.279 | -0.205 - 0.043 | 0.201 | 2.60X10 <sup>-1</sup> | 42.124 | 1421 | 983 |
| R parahippocampal          | -0.076 | 0.045 | -1.679 | -0.164 - 0.013 | 0.093 | 1.45X10 <sup>-1</sup> | 0.000  | 1447 | 996 |
| L_middletemporal           | -0.074 | 0.046 | -1.590 | -0.165 - 0.017 | 0.112 | 1.68X10 <sup>-1</sup> | 0.014  | 1345 | 958 |
| R_insula                   | -0.069 | 0.046 | -1.518 | -0.159 - 0.02  | 0.129 | 1.84X10 <sup>-1</sup> | 0.018  | 1412 | 990 |
| L_postcentral              | -0.065 | 0.045 | -1.434 | -0.153 - 0.024 | 0.152 | 2.09X10 <sup>-1</sup> | 0.005  | 1444 | 997 |
| L_lateralorbitofrontal     | -0.065 | 0.064 | -1.005 | -0.191 - 0.061 | 0.315 | 3.95X10 <sup>-1</sup> | 44.841 | 1443 | 999 |
| R_posteriorcingulate       | -0.061 | 0.062 | -0.986 | -0.184 - 0.061 | 0.324 | 4.00X10 <sup>-1</sup> | 41.687 | 1451 | 998 |
| L parahippocampal          | -0.060 | 0.045 | -1.328 | -0.149 - 0.029 | 0.184 | 2.45X10 <sup>-1</sup> | 0.000  | 1438 | 995 |
| R_inferiortemporal         | -0.035 | 0.049 | -0.701 | -0.131 - 0.062 | 0.483 | 5.71X10 <sup>-1</sup> | 12.480 | 1449 | 996 |
| R_postcentral              | -0.024 | 0.045 | -0.529 | -0.112 - 0.065 | 0.597 | 6.97X10 <sup>-1</sup> | 0.000  | 1447 | 996 |
| L_rostralanteriorcingulate | -0.023 | 0.068 | -0.344 | -0.156 - 0.109 | 0.731 | 8.22X10 <sup>-1</sup> | 49.941 | 1442 | 994 |
| R_isthmuscingulate         | -0.016 | 0.055 | -0.287 | -0.124 - 0.092 | 0.774 | 8.37X10 <sup>-1</sup> | 27.792 | 1448 | 997 |
| L_insula                   | -0.015 | 0.053 | -0.284 | -0.118 - 0.088 | 0.777 | 8.37X10 <sup>-1</sup> | 20.025 | 1409 | 985 |
| L_medialorbitofrontal      | -0.014 | 0.046 | -0.313 | -0.104 - 0.075 | 0.754 | 8.33X10 <sup>-1</sup> | 0.000  | 1429 | 975 |
| L_bankssts                 | -0.007 | 0.064 | -0.103 | -0.132 - 0.119 | 0.918 | 9.18X10 <sup>-1</sup> | 40.639 | 1381 | 937 |
| L_inferiortemporal         | -0.007 | 0.054 | -0.121 | -0.112 - 0.099 | 0.903 | 9.18X10 <sup>-1</sup> | 24.312 | 1446 | 996 |
| R_caudalanteriorcingulate  | 0.007  | 0.048 | 0.140  | -0.088 - 0.102 | 0.888 | 9.18X10 <sup>-1</sup> | 9.893  | 1449 | 997 |
| R_rostralanteriorcingulate | 0.023  | 0.067 | 0.340  | -0.108 - 0.154 | 0.734 | 8.22X10 <sup>-1</sup> | 48.820 | 1450 | 996 |
| L_caudalanteriorcingulate  | 0.050  | 0.052 | 0.962  | -0.052 - 0.153 | 0.336 | 4.09X10 <sup>-1</sup> | 20.078 | 1442 | 987 |

**Abbreviations:** SE, standard error; CI, confidence interval;  $I^2$ , heterogeneity index. Abbreviations for all cortical brain regions are provided in Supplementary Table 4. All uncorrected  $p$ -values are reported. Brain regions are ranked according to effect size (negative to positive).  $P$ -values were compared to an adjusted alpha level of  $p < 1.49 \times 10^{-4}$ . Significant brain regions are highlighted in red with an asterisk (\*).

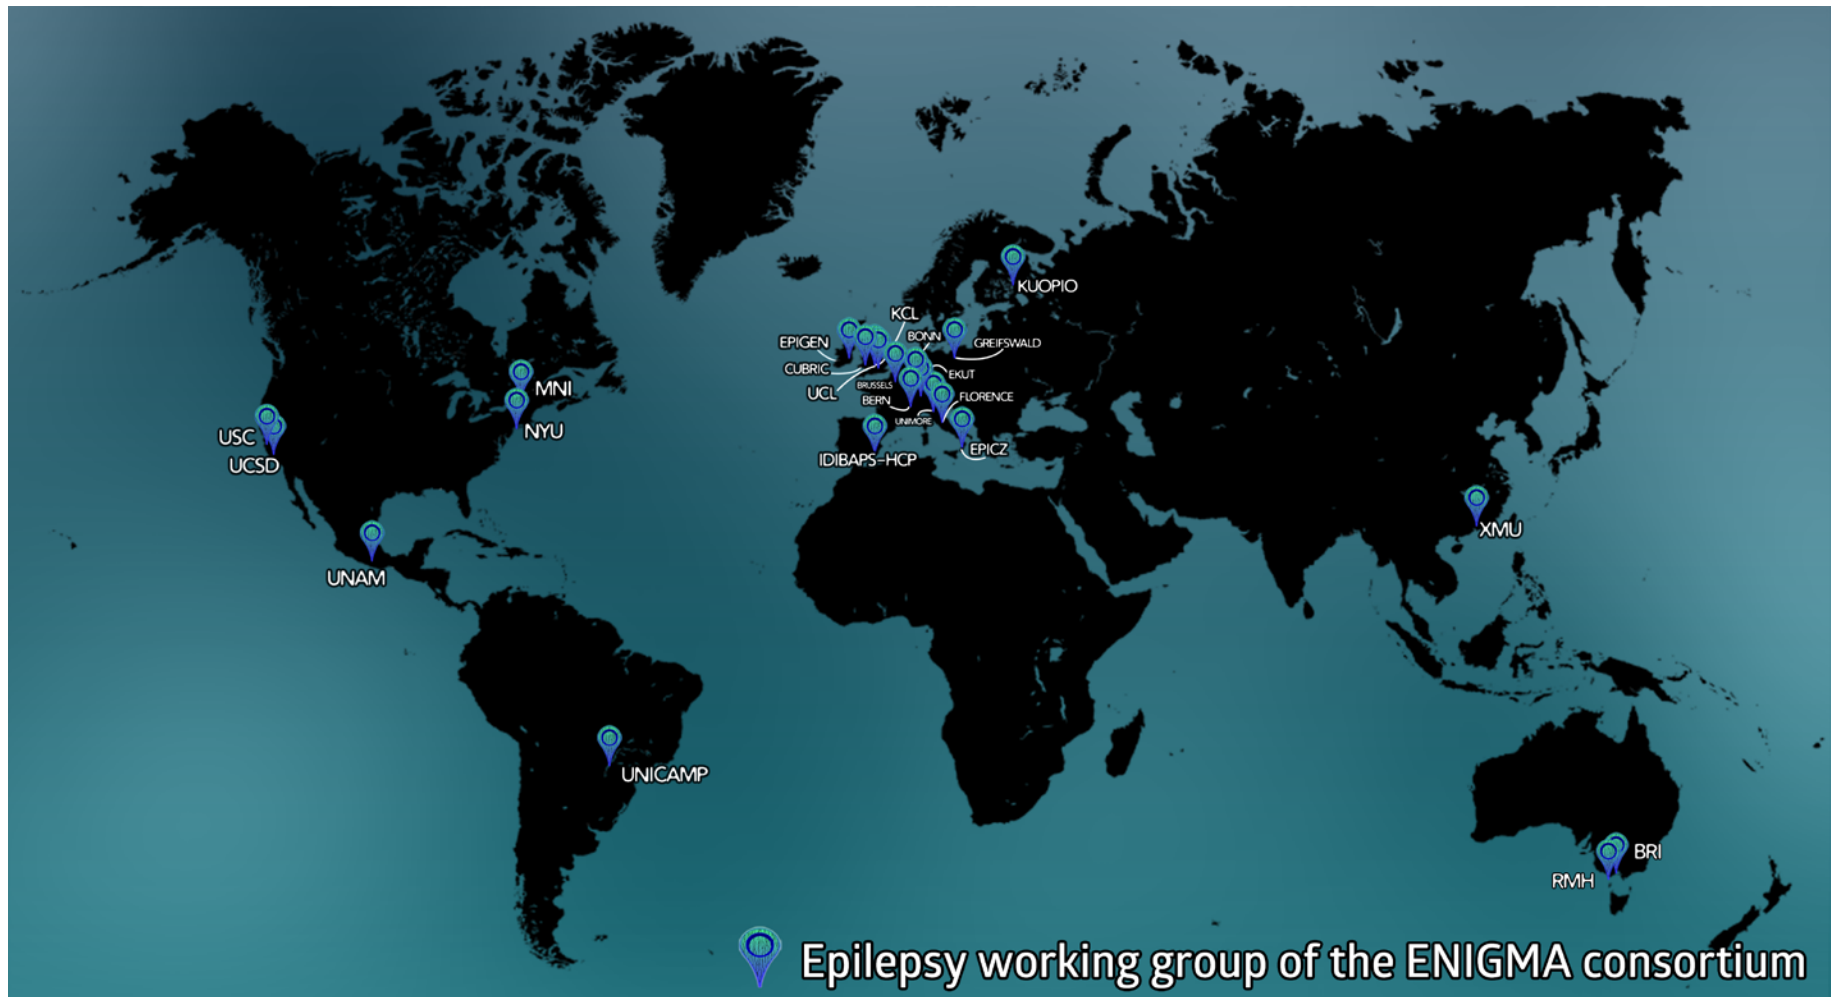

**Supplementary Figure 1.** ENIGMA-Epilepsy Worldwide Map. The initiative unites **24 research centres** from Europe (Barcelona, IDIBAPS; Bern; Bonn; Brussels; Cardiff, CUBRIC; Cantazaro, EPICZ; Dublin, EPIGEN; King's College London, KCL; Kuopio; Florence; Greifswald; Modena, UNIMORE; Tübingen), Australia (Royal Melbourne Hospital, RMH; Brain Research Institute, BRI), North America (University of California San Diego, UCSD; New York University, NYU), Central America (University Autonomous de Mexico, UNAM), South America (University of Campinas, UNICAMP) and South East Asia (Xiamen, XMU). The effort is coordinated by Christopher Whelan at the University of Southern California (USC) and Sanjay Sisodiya at University College London (UCL).

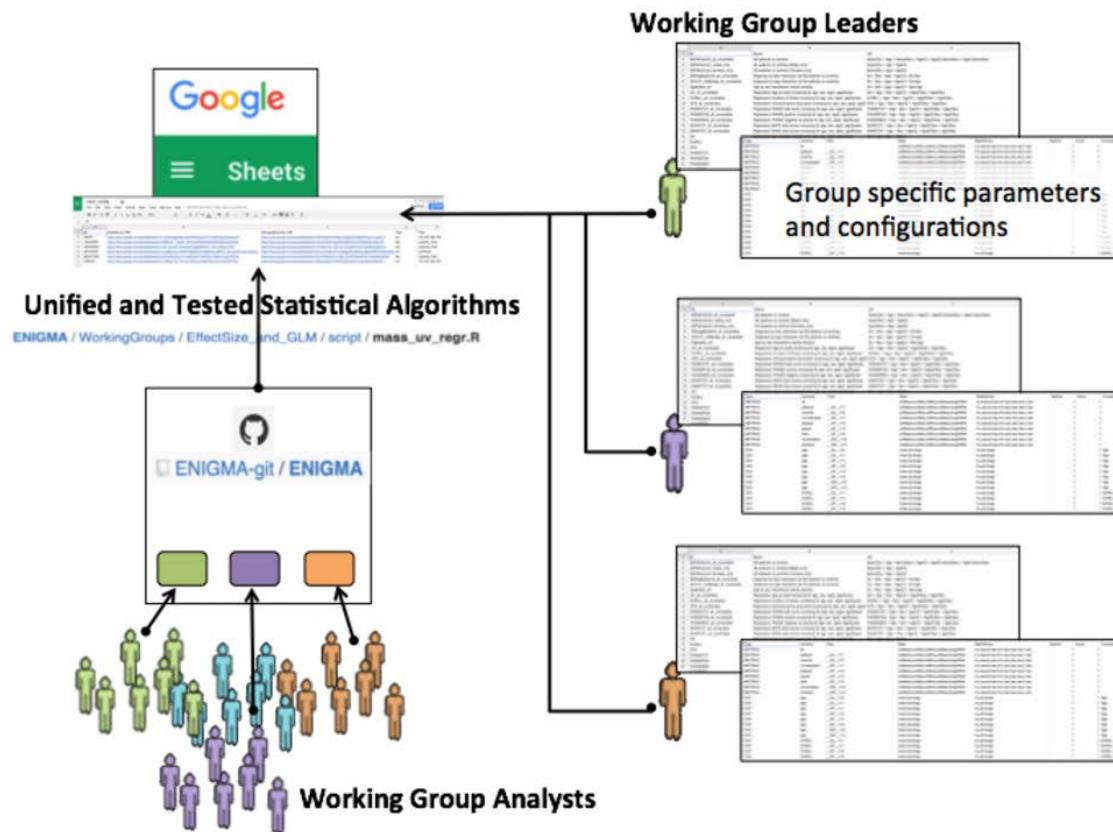

**Supplementary Figure 2.** Illustration and description of the coordinated ENIGMA meta-analysis framework. A standardized ENIGMA bash script is circulated to all ENIGMA-Epilepsy Working Group Analysts. The ENIGMA-Epilepsy Working Group leader configures any statistical tests or variables specific to their analysis using an online Google Sheet, and sets the tests they wish to run using a binary “ACTIVE” variable (0=do not run this test; 1=run this test). The local Working Group Analysts then execute their ENIGMA bash scripts, receiving statistical outputs for all ‘ACTIVE’ algorithms. The Google Sheet can be updated to include additional tests, without any requirement for re-circulation or re-configuration of the script by the local Working Group Analysts.

**Supplementary Figures 3-12** are available via the ENIGMA-Epilepsy website, at: <http://enigma.ini.usc.edu/ongoing/enigma-epilepsy/enigma-epilepsy-gm/>
